# Supplementary material for: Environmentally induced plasticity of programmed DNA elimination boosts somatic variability in Paramecium tetraurelia
Source: HighWire-hosted journal article supplement (doi:10.1101/gr.245332.118), 2019-09-23
Supplement: Supplemental_Figures_and_Tables.zip [file Supplemental_Fig_S2.pdf › Supplemental_Figures_and_Tables/Supplemental_Fig_S2.pdf]

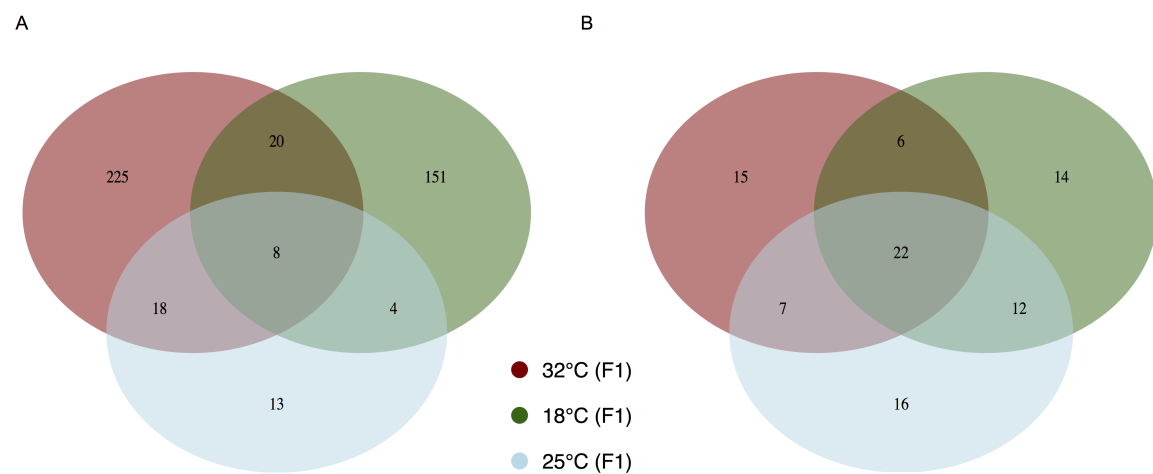

**Figure S2.** Sample intersections for IESs excised with reduced efficiency ( $IRS_{F1} > IRS_{F0}$ , Binomial test,  $P_{adj} < 0.05$ ) (A) and increased efficiency ( $IRS_{F1} < IRS_{F0}$ , Binomial test,  $P_{adj} < 0.05$ ) (B) after nuclear replacement.
