# Supplementary material for: Environmentally induced plasticity of programmed DNA elimination boosts somatic variability in Paramecium tetraurelia
Source: HighWire-hosted journal article supplement (doi:10.1101/gr.245332.118), 2019-09-23
Supplement: Supplemental_Figures_and_Tables.zip [file Supplemental_Fig_S3.pdf › Supplemental_Figures_and_Tables/Supplemental_Fig_S3.pdf]

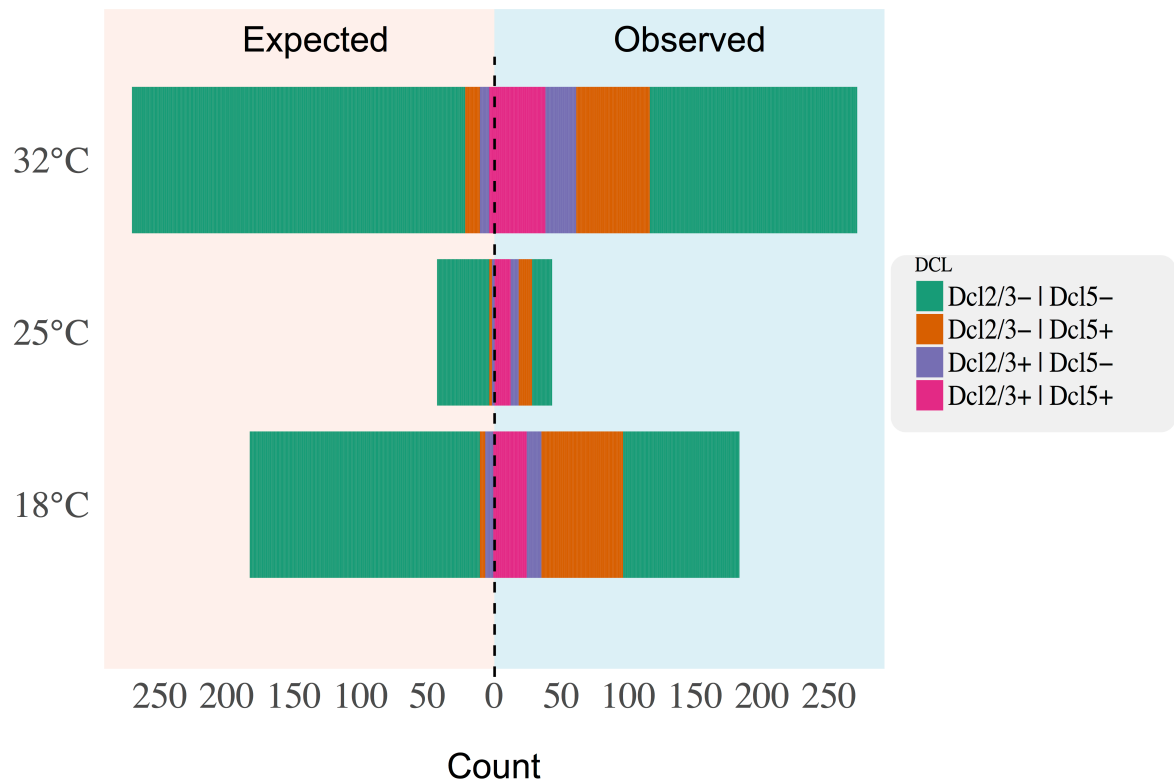

**Figure S3. A large excess of incompletely spliced IESs is epigenetically regulated.**

Back to back stacked bar chart showing the number of significantly retained IESs after nuclear differentiation at all investigated temperatures. For each temperature, IES counts are broken down into Dcl2/3-controlled IESs (Dcl2/3<sup>+</sup> | Dcl5<sup>-</sup>, Purple), Dcl5-controlled IESs (Dcl2/3<sup>-</sup> | Dcl5<sup>+</sup>, Orange), Dcl2/3-Dcl5-co-controlled IESs (Dcl2/3<sup>+</sup> | Dcl5<sup>+</sup>, Fuchsia) and Dcl-independent IESs (Dcl2/3<sup>-</sup> | Dcl5<sup>-</sup>, green). Expected proportion of Dcl-dependent IESs for random samples of the same size (left side) are shown back to back with the observed data (right side). Two proportions z-test returns a p-value<0.01 for all expected/observed contrasts.
