# Supplementary material for: Environmentally induced plasticity of programmed DNA elimination boosts somatic variability in Paramecium tetraurelia
Source: HighWire-hosted journal article supplement (doi:10.1101/gr.245332.118), 2019-09-23
Supplement: Supplemental_Figures_and_Tables.zip [file Supplemental_Fig_S4.pdf › Supplemental_Figures_and_Tables/Supplemental_Fig_S4.pdf]

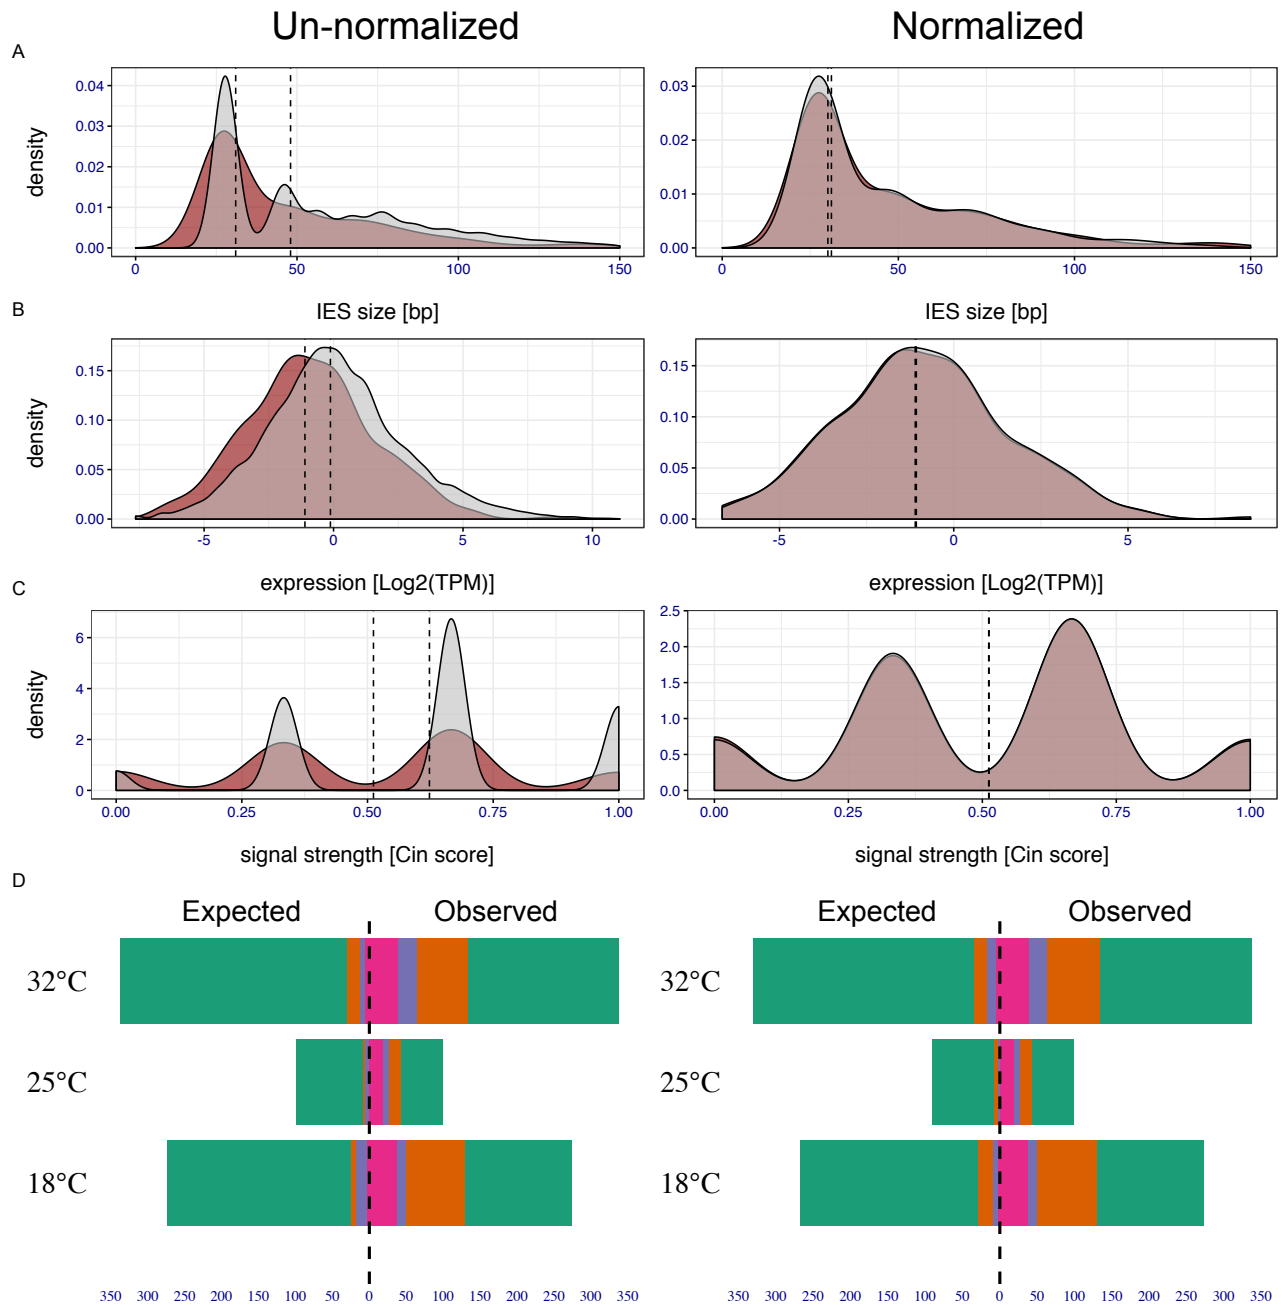

**Figure S4. Overrepresentation of epigenetically controlled IESs in the somatic set before (left) and after (right) normalization of potentially confounding variables.** (A) IES size, (B) TPM (of somatic-IES bearing genes), and (C)  $C_{in}$  score (proxy for splicing signal strength) distributions for the 32°C-experimental sample (red) and a random sample of the same size extracted from the PGM-set (blue), before (left) and after (right) normalization. (D) Back to back stacked bar chart showing the number of intra-exonic somatic IESs before and after normalization. For each temperature, IES counts are broken down into Dcl2/3-controlled IESs ( $Dcl2/3^+ | Dcl5^-$ , Purple), Dcl5-controlled IESs ( $Dcl2/3^- | Dcl5^+$ , Orange), Dcl2/3-Dcl5-co-controlled IESs ( $Dcl2/3^+ | Dcl5^+$ , Fuchsia) and Dcl-independent IESs ( $Dcl2/3^- | Dcl5^-$ , green). Expected proportion of Dcl-dependent IESs for random samples of the same size (expected) extracted from the PGM-set are shown back to back with the observed data (observed). Two proportions z-test returns a  $p$ -value  $< 0.01$  for all expected/observed contrasts before and after normalization. For all temperatures, IES



size, TPM and  $C_{in}$  score distributions of the random sample were matched to the observed distributions using a value-matching procedure during drawing ([FigS4\\_script.R](#)).
