# Supplementary material for: Environmentally induced plasticity of programmed DNA elimination boosts somatic variability in Paramecium tetraurelia
Source: HighWire-hosted journal article supplement (doi:10.1101/gr.245332.118), 2019-09-23
Supplement: Supplemental_Figures_and_Tables.zip [file Supplemental_Fig_S5.pdf › Supplemental_Figures_and_Tables/Supplemental_Fig_S5.pdf]

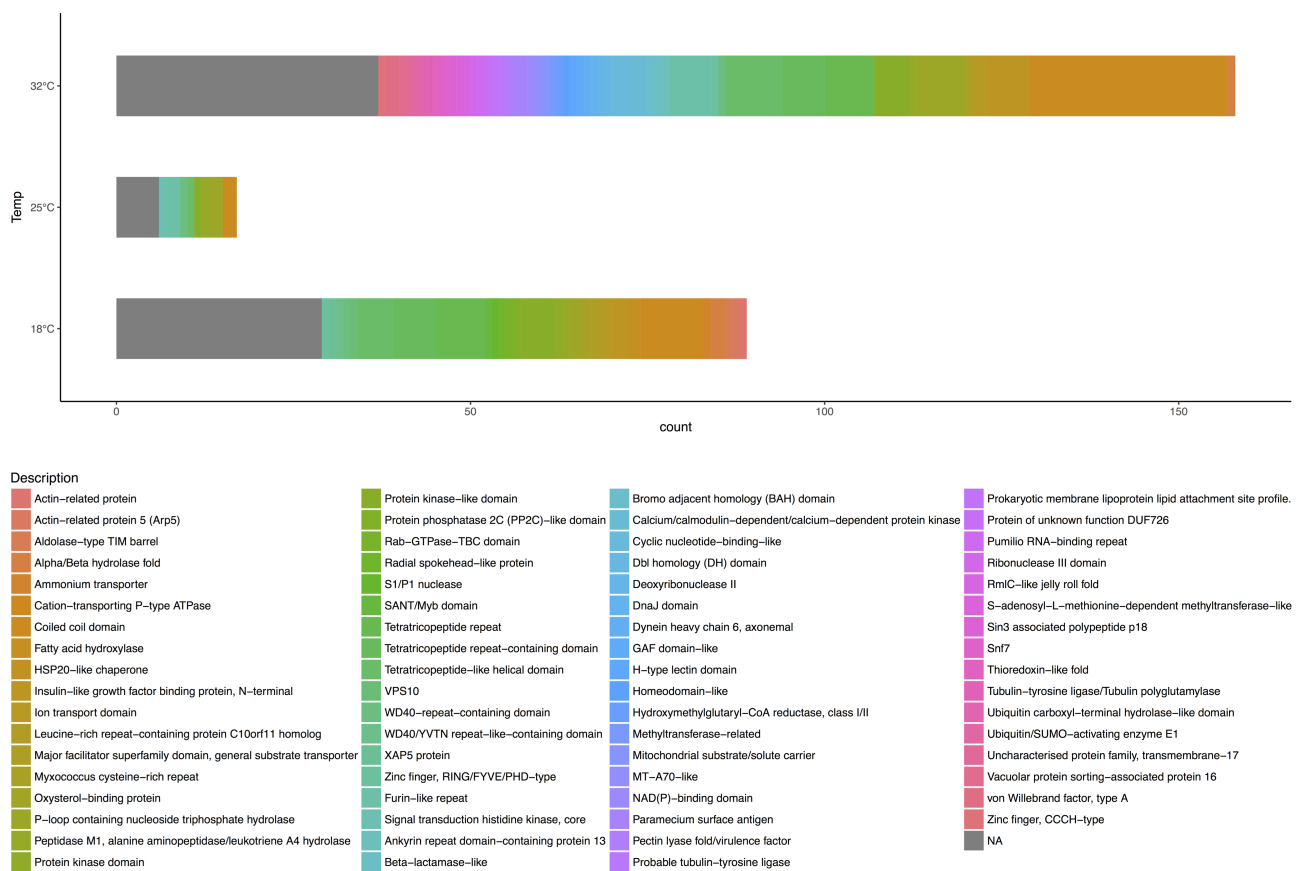

**Figure S5.** Counts and functional categorization of genes affected by significant IES retention after nuclear differentiation at different temperatures.
