# Supplementary material for: Environmentally induced plasticity of programmed DNA elimination boosts somatic variability in Paramecium tetraurelia
Source: HighWire-hosted journal article supplement (doi:10.1101/gr.245332.118), 2019-09-23
Supplement: Supplemental_Figures_and_Tables.zip [file Supplemental_Fig_S6.pdf › Supplemental_Figures_and_Tables/Supplemental_Fig_S6.pdf]

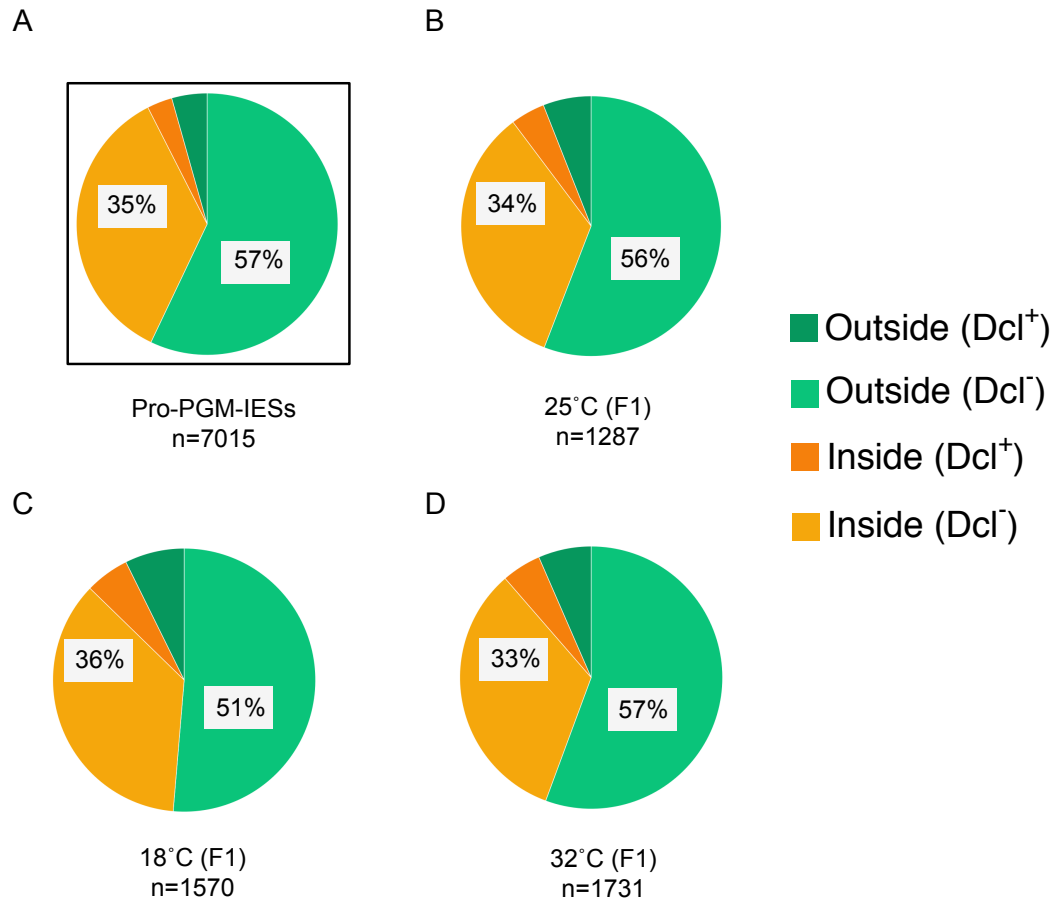

**Figure S6. Incompletely excised IESs inside conserved protein sequence domain.** (A) Fraction of productive IESs (CDS-mapping and ORF-preserving) in the PGM set. Of 7015 productive PGM-IESs, 2704 (39%) fall inside a conserved protein sequence domain. In addition, 526 of the 7015 PGM-IESs under exam are also Dcl2/3-5 sensitive (Dcl<sup>+</sup>), with 219 (42%) of them mapping to a conserved domain (Inside (Dcl<sup>+</sup>)). (B-D) Fraction of productive IESs in the set of incompletely excised IESs (IRS>0) retrieved at (B) 25°C, (C) 18°C or (D) 32°C. Comparable estimates are obtained for the experimental samples (38–41%). Likewise, a similar fraction of Dcl2/3-5 sensitive IESs is found within encoded domains (18°C: 43%, 32°C: 43%, 25°C: 42%). Sample size is indicated in brackets below each pie chart. Percentages below 10% are not indicated. Productive insertion is inferred at the DNA level.
