# Supplementary material for: Environmentally induced plasticity of programmed DNA elimination boosts somatic variability in Paramecium tetraurelia
Source: HighWire-hosted journal article supplement (doi:10.1101/gr.245332.118), 2019-09-23
Supplement: Supplemental_Figures_and_Tables.zip [file Supplemental_Fig_S7.pdf › Supplemental_Figures_and_Tables/Supplemental_Fig_S7.pdf]

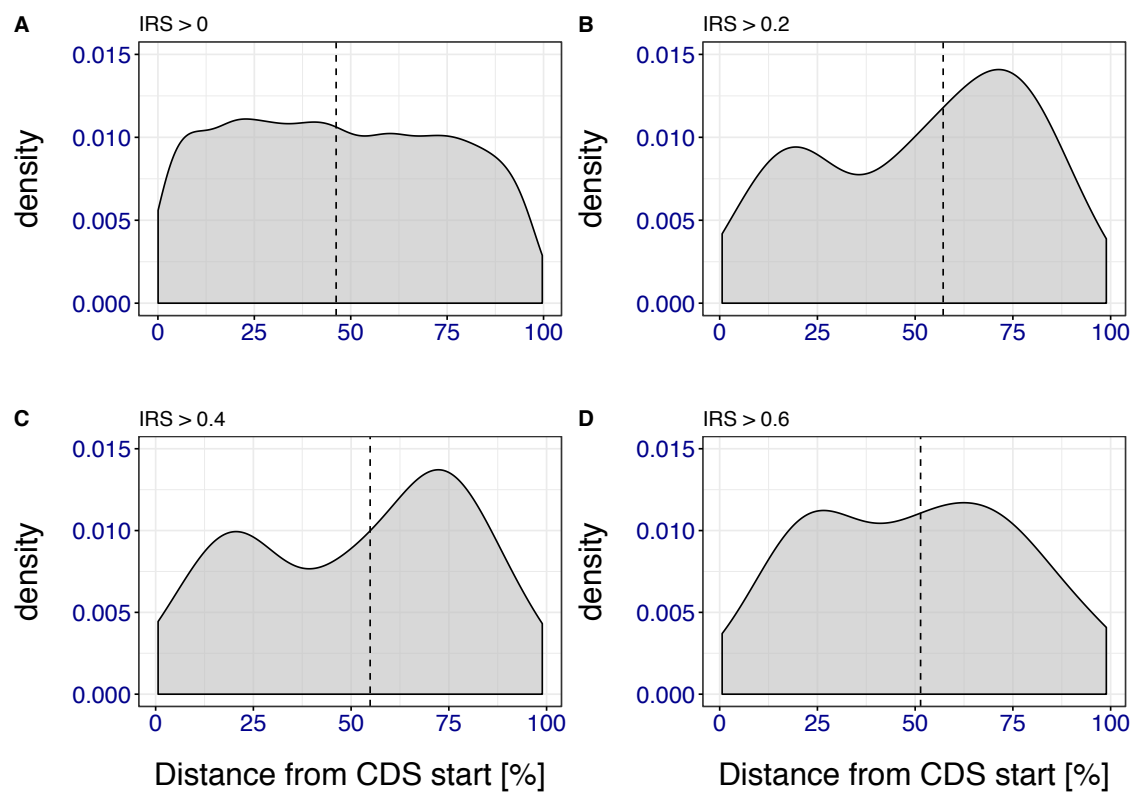

**Figure S7. Positional distribution of PTC-inducing IESs along genes (CDS).** The distribution is shown for different IRS thresholds (indicated at the top of each panel) for the 32°C sample. Corresponding values of skewness are (A) 0.07, (B) -0.26, (C) -0.21 and (D) 0.07.
