# Supplementary material for: Environmentally induced plasticity of programmed DNA elimination boosts somatic variability in Paramecium tetraurelia
Source: HighWire-hosted journal article supplement (doi:10.1101/gr.245332.118), 2019-09-23
Supplement: Supplemental_Figures_and_Tables.zip [file Supplemental_Table_S1.xlsx]

## Sheet: Table S1
DELETION_ID	DS_18F1	DS_25F0	DS_25F1	DS_32F1	SD	SCAFFOLD	START	END	DELETION_TYPE	STABILITY	GENE_ID1	GENE_ID2	GENE_ID3
MILORD.1.6478.6503	0.03	0.033	0.039	0.036	0.00387298	1	6478	6503	Gene_del_Partial	NA	PTET.51.1.G0010005
MILORD.1.8275.8300	0.049	0.019	0.02	0.018	0.0150222	1	8275	8300	Gene_del_Partial	NA	PTET.51.1.G0010005
MILORD.1.974796.974821	0.029	0.014	0.018	0.034	0.00932291	1	974796	974821	Gene_del_Partial	NA	PTET.51.1.G0010584
MILORD.1.977155.977266	0.143	0.217	0.067	0.333	0.113308	1	977155	977266	Gene_del_Partial	NA	PTET.51.1.G0010586
MILORD.10.669284.669341	0.022	0.013	0.013	0.024	0.00583095	10	669284	669341	Gene_del_Partial	NA	PTET.51.1.G0100413
MILORD.100.139907.140103	0.089	0.124	0.067	0.038	0.0362813	100	139907	140103	Gene_del_Partial	NA	PTET.51.1.G1000082
MILORD.100.1695.1816	0.03	0.017	0.02	0.025	0.00571548	100	1695	1816	Gene_del_Partial	NA	PTET.51.1.G1000002
MILORD.100.282350.282358	0.045	0.017	0.04	0.017	0.0148633	100	282350	282358	Gene_del_Partial	NA	PTET.51.1.G1000148
MILORD.101.288015.288022	0.078	0.034	0.026	0.096	0.0338772	101	288015	288022	Gene_del_Partial	NA	PTET.51.1.G1010192
MILORD.102.18151.18201	0.079	0.111	0.149	0.133	0.0303095	102	18151	18201	Gene_del_Partial	NA	PTET.51.1.G1020012
MILORD.102.286570.286589	0.033	0.039	0.028	0.038	0.00506623	102	286570	286589	Gene_del_Partial	NA	PTET.51.1.G1020188
MILORD.103.179248.179291	0.024	0.015	0.024	0.033	0.00734847	103	179248	179291	Gene_del_Partial	NA	PTET.51.1.G1030103
MILORD.103.247242.247286	0.016	0.011	0.013	0.022	0.00479583	103	247242	247286	Gene_del_Partial	NA	PTET.51.1.G1030148
MILORD.103.297720.297746	0.103	0.016	0.056	0.014	0.0418997	103	297720	297746	Gene_del_Partial	NA	PTET.51.1.G1030184
MILORD.104.17730.17757	0.018	0.014	0.018	0.013	0.00262996	104	17730	17757	Gene_del_Partial	NA	PTET.51.1.G1040007
MILORD.104.230676.230680	0.017	0.013	0.011	0.013	0.00251661	104	230676	230680	Gene_del_Partial	NA	PTET.51.1.G1040130
MILORD.105.212545.212572	0.024	0.015	0.019	0.035	0.00865544	105	212545	212572	Gene_del_Partial	NA	PTET.51.1.G1050137
MILORD.105.34016.34024	0.413	0.511	0.267	0.742	0.199517	105	34016	34024	Gene_del_Partial	NA	PTET.51.1.G1050023
MILORD.107.226660.226686	0.032	0.014	0.014	0.012	0.00938083	107	226660	226686	Gene_del_Partial	NA	PTET.51.1.G1070132
MILORD.107.3942.3967	0.031	0.018	0.067	0.028	0.0214009	107	3942	3967	Gene_del_Partial	NA	PTET.51.1.G1070002
MILORD.108.172755.172781	0.103	0.018	0.021	0.022	0.0413683	108	172755	172781	Gene_del_Partial	NA	PTET.51.1.G1080119
MILORD.108.236770.236778	0.023	0.013	0.059	0.065	0.0258457	108	236770	236778	Gene_del_Partial	NA	PTET.51.1.G1080170
MILORD.108.279891.279918	0.037	0.016	0.033	0.021	0.00987843	108	279891	279918	Gene_del_Partial	NA	PTET.51.1.G1080196
MILORD.109.2747.2773	0.07	0.101	0.15	0.08	0.0355938	109	2747	2773	Gene_del_Partial	NA	PTET.51.1.G1090002
MILORD.11.677505.677660	0.039	0.018	0.023	0.037	0.0103401	11	677505	677660	Gene_del_Partial	NA	PTET.51.1.G0110443
MILORD.110.285359.285405	0.032	0.047	0.019	0.027	0.0117863	110	285359	285405	Gene_del_Partial	NA	PTET.51.1.G1100178
MILORD.110.55944.56035	0.562	0.846	1	1	0.206514	110	55944	56035	Gene_del_Partial	Stable	PTET.51.1.G1100034
MILORD.111.105471.105480	0.043	0.028	0.017	0.011	0.0140564	111	105471	105480	Gene_del_Partial	NA	PTET.51.1.G1110050
MILORD.111.201650.201675	0.045	0.011	0.02	0.024	0.0143991	111	201650	201675	Gene_del_Partial	NA	PTET.51.1.G1110114
MILORD.111.292376.292985	0.273	0.071	0.083	0.036	0.106713	111	292376	292985	Gene_del_Partial	NA	PTET.51.1.G1110171
MILORD.112.129283.129349	0.018	0.01	0.032	0.032	0.0108934	112	129283	129349	Gene_del_Partial	NA	PTET.51.1.G1120078
MILORD.112.45962.45967	0.019	0.014	0.017	0.029	0.0065	112	45962	45967	Gene_del_Partial	NA	PTET.51.1.G1120026
MILORD.113.133598.133602	0.047	0.045	0.031	0.147	0.0534759	113	133598	133602	Gene_del_Partial	NA	PTET.51.1.G1130072
MILORD.113.274775.274898	0.043	0.018	0.023	0.089	0.0323561	113	274775	274898	Gene_del_Partial	NA	PTET.51.1.G1130158
MILORD.114.115394.115468	0.186	0.176	0.133	0.173	0.0233381	114	115394	115468	Gene_del_Partial	NA	PTET.51.1.G1140069
MILORD.114.3151.3317	0.031	0.015	0.023	0.045	0.0127932	114	3151	3317	Gene_del_Partial	NA	PTET.51.1.G1140002
MILORD.115.188730.188755	0.015	0.011	0.017	0.037	0.0116046	115	188730	188755	Gene_del_Partial	NA	PTET.51.1.G1150113
MILORD.116.134682.134710	0.012	0.015	0.015	0.012	0.00173205	116	134682	134710	Gene_del_Partial	NA	PTET.51.1.G1160082
MILORD.116.15043.15088	0.647	0.6	1	0.8	0.18033	116	15043	15088	Gene_del_Partial	Stable	PTET.51.1.G1160012
MILORD.116.227155.227160	0.025	0.09	0.017	0.038	0.0328278	116	227155	227160	Gene_del_Partial	NA	PTET.51.1.G1160136
MILORD.116.7834.7847	0.054	0.019	0.019	0.011	0.0192072	116	7834	7847	Gene_del_Partial	NA	PTET.51.1.G1160006
MILORD.117.283184.284884	0.035	0.025	0.027	0.026	0.00457347	117	283184	284884	Gene_del_Partial	NA	PTET.51.1.G1170173
MILORD.118.282234.282259	0.117	0.583	0.048	0.031	0.261491	118	282234	282259	Gene_del_Partial	Unstable	PTET.51.1.G1180178
MILORD.12.122875.122879	0.385	0.043	0.467	0.471	0.202908	12	122875	122879	Gene_del_Partial	NA	PTET.51.1.G0120071
MILORD.12.302789.302809	0.018	0.026	0.062	0.014	0.0219089	12	302789	302809	Gene_del_Partial	NA	PTET.51.1.G0120187
MILORD.12.303011.303045	0.014	0.022	0.015	0.017	0.00355903	12	303011	303045	Gene_del_Partial	NA	PTET.51.1.G0120187
MILORD.12.637874.637901	0.028	0.029	0.015	0.021	0.00655108	12	637874	637901	Gene_del_Partial	NA	PTET.51.1.G0120388
MILORD.121.44056.44071	0.106	0.017	0.025	0.048	0.0402078	121	44056	44071	Gene_del_Partial	NA	PTET.51.1.G1210026
MILORD.122.9866.9918	0.054	0.086	0.067	0.294	0.113265	122	9866	9918	Gene_del_Partial	NA	PTET.51.1.G1220006
MILORD.123.20732.20790	0.016	0.013	0.022	0.121	0.0521344	123	20732	20790	Gene_del_Partial	NA	PTET.51.1.G1230010
MILORD.124.266469.266497	0.017	0.02	0.045	0.014	0.0142127	124	266469	266497	Gene_del_Partial	NA	PTET.51.1.G1240161
MILORD.124.266591.266716	0.018	0.031	0.019	0.051	0.0153487	124	266591	266716	Gene_del_Partial	NA	PTET.51.1.G1240161
MILORD.124.78981.79024	0.023	0.056	0.105	0.023	0.0387589	124	78981	79024	Gene_del_Partial	NA	PTET.51.1.G1240042
MILORD.125.262901.262946	0.045	0.018	0.036	0.029	0.0114018	125	262901	262946	Gene_del_Partial	NA	PTET.51.1.G1250179
MILORD.126.9562.9588	0.034	0.036	0.013	0.013	0.0127279	126	9562	9588	Gene_del_Partial	NA	PTET.51.1.G1260002
MILORD.127.264461.264505	0.013	0.012	0.013	0.012	0.00057735	127	264461	264505	Gene_del_Partial	NA	PTET.51.1.G1270154	PTET.51.1.G1270155
MILORD.128.16914.17357	1	0.724	1	0.889	0.130454	128	16914	17357	Gene_del_Partial	Stable	PTET.51.1.G1280006
MILORD.128.82573.82619	0.024	0.017	0.015	0.011	0.00543906	128	82573	82619	Gene_del_Partial	NA	PTET.51.1.G1280050
MILORD.13.10498.10523	0.05	0.011	0.052	0.024	0.0200728	13	10498	10523	Gene_del_Partial	NA	PTET.51.1.G0130005
MILORD.13.14675.14700	0.043	0.011	0.051	0.033	0.0173109	13	14675	14700	Gene_del_Partial	NA	PTET.51.1.G0130007
MILORD.13.274681.274745	0.012	0.024	0.011	0.012	0.00618466	13	274681	274745	Gene_del_Partial	NA	PTET.51.1.G0130169
MILORD.13.569536.569580	0.562	0.7	0.25	0.017	0.307773	13	569536	569580	Gene_del_Partial	Unstable	PTET.51.1.G0130354
MILORD.13.641945.641973	0.02	0.013	0.029	0.018	0.00668331	13	641945	641973	Gene_del_Partial	NA	PTET.51.1.G0130396
MILORD.13.658188.658351	1	0.333	0.667	0.273	0.335993	13	658188	658351	Gene_del_Partial	Stable	PTET.51.1.G0130403
MILORD.13.8284.8438	0.282	0.206	0.4	0.862	0.29404	13	8284	8438	Gene_del_Partial	Unstable	PTET.51.1.G0130004
MILORD.130.182898.182925	0.018	0.027	0.014	0.029	0.00716473	130	182898	182925	Gene_del_Partial	NA	PTET.51.1.G1300114
MILORD.130.78308.78334	0.05	0.022	0.077	0.027	0.0251529	130	78308	78334	Gene_del_Partial	NA	PTET.51.1.G1300051
MILORD.131.147878.147882	0.017	0.013	0.022	0.026	0.00568624	131	147878	147882	Gene_del_Partial	NA	PTET.51.1.G1310084
MILORD.133.112039.112046	0.013	0.013	0.027	0.014	0.00684957	133	112039	112046	Gene_del_Partial	NA	PTET.51.1.G1330073
MILORD.133.140699.140703	0.042	0.056	0.029	0.044	0.0110567	133	140699	140703	Gene_del_Partial	NA	PTET.51.1.G1330091
MILORD.135.219098.219125	0.032	0.013	0.02	0.012	0.00921502	135	219098	219125	Gene_del_Partial	NA	PTET.51.1.G1350106
MILORD.135.30571.30681	0.031	0.013	0.031	0.062	0.0203531	135	30571	30681	Gene_del_Partial	NA	PTET.51.1.G1350012
MILORD.136.54168.54181	0.067	0.015	0.012	0.029	0.0252768	136	54168	54181	Gene_del_Partial	NA	PTET.51.1.G1360030
MILORD.137.55858.55865	0.103	0.016	0.023	0.026	0.0408819	137	55858	55865	Gene_del_Partial	NA	PTET.51.1.G1370033
MILORD.138.15269.15309	0.024	0.017	0.016	0.028	0.0057373	138	15269	15309	Gene_del_Partial	NA	PTET.51.1.G1380006
MILORD.139.196743.196757	0.012	0.026	0.012	0.024	0.00754983	139	196743	196757	Gene_del_Partial	NA	PTET.51.1.G1390127
MILORD.139.245594.245622	0.032	0.027	0.019	0.015	0.00767572	139	245594	245622	Gene_del_Partial	NA	PTET.51.1.G1390146
MILORD.139.7281.7398	0.017	0.022	0.034	0.037	0.00953939	139	7281	7398	Gene_del_Partial	NA	PTET.51.1.G1390004
MILORD.14.356840.356845	0.475	0.2	0.517	0.529	0.155236	14	356840	356845	Gene_del_Partial	NA	PTET.51.1.G0140206
MILORD.14.463567.463644	0.025	0.012	0.011	0.032	0.0102307	14	463567	463644	Gene_del_Partial	NA	PTET.51.1.G0140275
MILORD.140.2193.2373	0.2	0.714	0.167	0.067	0.290229	140	2193	2373	Gene_del_Partial	NA	PTET.51.1.G1400002
MILORD.140.94640.94649	0.1	0.014	0.104	0.02	0.049163	140	94640	94649	Gene_del_Partial	NA	PTET.51.1.G1400072
MILORD.141.172005.172030	0.021	0.019	0.011	0.011	0.00525991	141	172005	172030	Gene_del_Partial	NA	PTET.51.1.G1410084
MILORD.141.75329.75363	0.021	0.028	0.014	0.014	0.00670199	141	75329	75363	Gene_del_Partial	NA	PTET.51.1.G1410046
MILORD.144.108967.111114	0.095	0.417	0.077	0.111	0.16193	144	108967	111114	Gene_del_Total	NA	PTET.51.1.G1440055	PTET.51.1.G1440056	PTET.51.1.G1440057
MILORD.144.126947.127023	0.108	0.021	0.158	0.3	0.1168	144	126947	127023	Gene_del_Partial	NA	PTET.51.1.G1440070
MILORD.146.10701.10725	0.016	0.024	0.017	0.031	0.00697615	146	10701	10725	Gene_del_Partial	NA	PTET.51.1.G1460006
MILORD.146.240527.240615	0.05	0.548	0.024	0.02	0.258675	146	240527	240615	Gene_del_Partial	Unstable	PTET.51.1.G1460128
MILORD.147.114255.114583	0.032	0.029	0.024	0.015	0.00743864	147	114255	114583	Gene_del_Partial	NA	PTET.51.1.G1470085
MILORD.147.4285.4313	0.075	0.021	0.018	0.066	0.0296985	147	4285	4313	Gene_del_Partial	NA	PTET.51.1.G1470003
MILORD.149.1461.1489	0.155	0.032	0.047	0.025	0.0608626	149	1461	1489	Gene_del_Partial	NA	PTET.51.1.G1490002
MILORD.15.380459.380484	0.034	0.034	0.021	0.014	0.00994569	15	380459	380484	Gene_del_Partial	NA	PTET.51.1.G0150214
MILORD.150.179089.179135	0.042	0.013	0.03	0.011	0.0147196	150	179089	179135	Gene_del_Partial	NA	PTET.51.1.G1500096
MILORD.150.228721.228769	0.051	0.014	0.014	0.025	0.0174547	150	228721	228769	Gene_del_Partial	NA	PTET.51.1.G1500129
MILORD.150.2471.2500	0.022	0.018	0.021	0.022	0.00189297	150	2471	2500	Gene_del_Partial	NA	PTET.51.1.G1500001
MILORD.151.147893.147938	0.068	0.029	0.04	0.169	0.0638148	151	147893	147938	Gene_del_Partial	NA	PTET.51.1.G1510101
MILORD.151.167284.167288	0.226	0.011	0.053	0.051	0.0958067	151	167284	167288	Gene_del_Partial	NA	PTET.51.1.G1510110
MILORD.152.102264.102290	0.025	0.043	0.015	0.018	0.0125532	152	102264	102290	Gene_del_Partial	NA	PTET.51.1.G1520056
MILORD.152.6245.6271	0.053	0.158	0.053	0.042	0.0545802	152	6245	6271	Gene_del_Partial	NA	PTET.51.1.G1520002
MILORD.155.96163.96221	0.02	0.028	0.029	0.019	0.00522813	155	96163	96221	Gene_del_Partial	NA	PTET.51.1.G1550055
MILORD.156.130863.130890	0.059	0.018	0.021	0.049	0.0203695	156	130863	130890	Gene_del_Partial	NA	PTET.51.1.G1560077
MILORD.156.130869.130893	0.062	0.019	0.045	0.017	0.0216545	156	130869	130893	Gene_del_Partial	NA	PTET.51.1.G1560077
MILORD.156.35689.35761	0.031	0.02	0.056	0.038	0.0151079	156	35689	35761	Gene_del_Partial	NA	PTET.51.1.G1560024
MILORD.158.201279.201891	0.9	1	1	0.909	0.0552592	158	201279	201891	Gene_del_Partial	Stable	PTET.51.1.G1580097
MILORD.158.201279.201893	0.818	1	1	0.5	0.235827	158	201279	201893	Gene_del_Partial	Stable	PTET.51.1.G1580097
MILORD.159.143571.143576	0.048	0.081	0.111	0.074	0.0259037	159	143571	143576	Gene_del_Partial	NA	PTET.51.1.G1590092
MILORD.159.143571.143579	0.31	0.056	0.13	0.038	0.124219	159	143571	143579	Gene_del_Partial	NA	PTET.51.1.G1590092
MILORD.16.266232.266259	0.014	0.011	0.016	0.014	0.00206155	16	266232	266259	Gene_del_Partial	NA	PTET.51.1.G0160167
MILORD.16.4662.4690	0.017	0.016	0.015	0.013	0.00170783	16	4662	4690	Gene_del_Partial	NA	PTET.51.1.G0160004
MILORD.161.12024.12071	0.031	0.05	0.014	0.014	0.0171537	161	12024	12071	Gene_del_Partial	NA	PTET.51.1.G1610007
MILORD.161.3269.3346	0.061	0.013	0.028	0.018	0.021587	161	3269	3346	Gene_del_Partial	NA	PTET.51.1.G1610001
MILORD.161.78922.78950	0.414	0.153	0.025	0.028	0.182678	161	78922	78950	Gene_del_Partial	NA	PTET.51.1.G1610051
MILORD.162.119746.119771	0.028	0.011	0.028	0.039	0.0115614	162	119746	119771	Gene_del_Partial	NA	PTET.51.1.G1620073
MILORD.163.7205.7254	0.015	0.009	0.013	0.017	0.00341565	163	7205	7254	Gene_del_Partial	NA	PTET.51.1.G1630002
MILORD.165.132890.132908	0.02	0.019	0.017	0.015	0.00221736	165	132890	132908	Gene_del_Partial	NA	PTET.51.1.G1650090
MILORD.167.154097.154101	0.015	0.036	0.016	0.014	0.0105317	167	154097	154101	Gene_del_Partial	NA	PTET.51.1.G1670090
MILORD.167.91923.91931	0.063	0.016	0.029	0.079	0.029239	167	91923	91931	Gene_del_Partial	NA	PTET.51.1.G1670067
MILORD.168.184986.185012	0.016	0.025	0.019	0.018	0.00387298	168	184986	185012	Gene_del_Partial	NA	PTET.51.1.G1680107
MILORD.17.113737.113791	0.333	0.243	0.149	0.176	0.0819853	17	113737	113791	Gene_del_Partial	NA	PTET.51.1.G0170068
MILORD.17.621042.621110	0.064	0.069	0.043	0.067	0.0120104	17	621042	621110	Gene_del_Partial	NA	PTET.51.1.G0170359
MILORD.171.137272.137280	0.046	0.047	0.043	0.104	0.0293825	171	137272	137280	Gene_del_Partial	NA	PTET.51.1.G1710075
MILORD.175.132882.132894	0.018	0.033	0.038	0.132	0.0518676	175	132882	132894	Gene_del_Partial	NA	PTET.51.1.G1750080
MILORD.175.31165.31210	0.038	0.03	0.013	0.025	0.0104722	175	31165	31210	Gene_del_Partial	NA	PTET.51.1.G1750023
MILORD.176.132397.132421	0.226	0.017	0.167	0.048	0.0985173	176	132397	132421	Gene_del_Partial	NA	PTET.51.1.G1760080
MILORD.176.3532.3548	0.018	0.015	0.023	0.018	0.00331662	176	3532	3548	Gene_del_Partial	NA	PTET.51.1.G1760003
MILORD.177.62961.62966	0.022	0.022	0.016	0.08	0.030133	177	62961	62966	Gene_del_Partial	NA	PTET.51.1.G1770036
MILORD.177.94845.94871	0.021	0.012	0.029	0.011	0.00846069	177	94845	94871	Gene_del_Partial	NA	PTET.51.1.G1770055
MILORD.18.162888.162936	0.015	0.013	0.012	0.013	0.00125831	18	162888	162936	Gene_del_Partial	NA	PTET.51.1.G0180080
MILORD.18.295017.295025	0.769	0.83	0.826	0.962	0.0817287	18	295017	295025	Gene_del_Partial	Stable	PTET.51.1.G0180164
MILORD.18.323457.323521	0.034	0.034	0.015	0.011	0.0122338	18	323457	323521	Gene_del_Partial	NA	PTET.51.1.G0180183
MILORD.187.15305.15353	0.029	0.013	0.014	0.013	0.0078475	187	15305	15353	Gene_del_Partial	NA	PTET.51.1.G1870010
MILORD.188.23165.23173	0.156	0.176	0.307	0.14	0.0762687	188	23165	23173	Gene_del_Partial	NA	PTET.51.1.G1880008
MILORD.188.33532.33575	0.014	0.008	0.012	0.043	0.0160286	188	33532	33575	Gene_del_Partial	NA	PTET.51.1.G1880015
MILORD.19.18513.18601	0.909	1	1	0.478	0.249548	19	18513	18601	Gene_del_Partial	Stable	PTET.51.1.G0190018
MILORD.19.362658.362702	0.041	0.029	0.038	0.062	0.0139642	19	362658	362702	Gene_del_Partial	NA	PTET.51.1.G0190218
MILORD.19.375994.376049	0.625	0.871	0.418	0.013	0.363239	19	375994	376049	Gene_del_Partial	Unstable	PTET.51.1.G0190225
MILORD.19.587487.587495	0.111	0.214	0.39	0.186	0.118128	19	587487	587495	Gene_del_Partial	NA	PTET.51.1.G0190348
MILORD.192.1386.1411	0.048	0.056	0.056	0.023	0.0156285	192	1386	1411	Gene_del_Partial	NA	PTET.51.1.G1920001
MILORD.192.1392.1508	0.1	0.108	0.081	0.06	0.0214068	192	1392	1508	Gene_del_Partial	NA	PTET.51.1.G1920001
MILORD.192.1437.1508	0.048	0.061	0.091	0.035	0.0239774	192	1437	1508	Gene_del_Partial	NA	PTET.51.1.G1920001
MILORD.197.18977.19009	0.089	0.087	0.167	0.059	0.0464004	197	18977	19009	Gene_del_Partial	NA	PTET.51.1.G1970005
MILORD.198.6320.6339	0.63	0.793	0.455	0.73	0.147488	198	6320	6339	Gene_del_Partial	NA	PTET.51.1.G1980002
MILORD.2.386506.386571	0.015	0.012	0.012	0.016	0.00206155	2	386506	386571	Gene_del_Partial	NA	PTET.51.1.G0020207
MILORD.2.479393.479468	0.018	0.045	0.015	0.015	0.0145688	2	479393	479468	Gene_del_Partial	NA	PTET.51.1.G0020256	PTET.51.1.G0020257
MILORD.2.666259.666304	0.094	0.015	0.021	0.143	0.0614241	2	666259	666304	Gene_del_Partial	NA	PTET.51.1.G0020387
MILORD.2.674366.674396	0.014	0.012	0.017	0.029	0.00761577	2	674366	674396	Gene_del_Partial	NA	PTET.51.1.G0020390
MILORD.2.725173.725199	0.118	0.127	0.184	0.033	0.0622816	2	725173	725199	Gene_del_Partial	NA	PTET.51.1.G0020427
MILORD.20.264547.264572	0.041	0.021	0.016	0.011	0.0131498	20	264547	264572	Gene_del_Partial	NA	PTET.51.1.G0200151
MILORD.20.288456.288483	0.071	0.25	0.041	0.084	0.0940727	20	288456	288483	Gene_del_Partial	NA	PTET.51.1.G0200165
MILORD.20.351050.351106	0.029	0.014	0.023	0.02	0.006245	20	351050	351106	Gene_del_Partial	NA	PTET.51.1.G0200200
MILORD.20.418936.418961	0.032	0.016	0.019	0.038	0.0104682	20	418936	418961	Gene_del_Partial	NA	PTET.51.1.G0200248
MILORD.20.482315.482331	0.031	0.031	0.016	0.014	0.00927362	20	482315	482331	Gene_del_Partial	NA	PTET.51.1.G0200283
MILORD.20.88131.88142	0.07	0.027	0.024	0.164	0.0653063	20	88131	88142	Gene_del_Partial	NA	PTET.51.1.G0200051
MILORD.21.505968.505993	0.023	0.013	0.013	0.011	0.00541603	21	505968	505993	Gene_del_Partial	NA	PTET.51.1.G0210281
MILORD.21.517026.517053	0.053	0.017	0.024	0.029	0.0156285	21	517026	517053	Gene_del_Partial	NA	PTET.51.1.G0210288
MILORD.22.221103.221141	0.719	0.824	0.75	0.25	0.260912	22	221103	221141	Gene_del_Partial	Stable	PTET.51.1.G0220150
MILORD.22.477364.477585	0.778	0.5	0.737	0.3	0.222596	22	477364	477585	Gene_del_Partial	Unstable	PTET.51.1.G0220310
MILORD.22.94794.94866	0.015	0.049	0.017	0.014	0.0168795	22	94794	94866	Gene_del_Partial	NA	PTET.51.1.G0220065
MILORD.23.563121.563205	0.512	0.455	0.226	0.2	0.158254	23	563121	563205	Gene_del_Partial	NA	PTET.51.1.G0230332
MILORD.25.175694.175698	0.079	0.016	0.141	0.102	0.0523482	25	175694	175698	Gene_del_Partial	NA	PTET.51.1.G0250088
MILORD.25.2535.2575	0.824	0.76	0.091	0.189	0.379453	25	2535	2575	Gene_del_Partial	Unstable	PTET.51.1.G0250003
MILORD.250.6729.6750	0.227	0.071	0.125	0.231	0.0787972	250	6729	6750	Gene_del_Partial	NA	PTET.51.1.G2500004
MILORD.26.300778.300874	0.455	1	0.667	0.032	0.405384	26	300778	300874	Gene_del_Partial	Unstable	PTET.51.1.G0260179
MILORD.27.200333.200377	0.013	0.009	0.021	0.015	0.005	27	200333	200377	Gene_del_Partial	NA	PTET.51.1.G0270120
MILORD.27.290214.290224	0.017	0.015	0.023	0.014	0.00403113	27	290214	290224	Gene_del_Partial	NA	PTET.51.1.G0270160
MILORD.28.104034.104045	0.061	0.161	0.056	0.14	0.0538424	28	104034	104045	Gene_del_Partial	NA	PTET.51.1.G0280071
MILORD.28.297840.297851	0.066	0.039	0.033	0.014	0.0214942	28	297840	297851	Gene_del_Partial	NA	PTET.51.1.G0280174
MILORD.29.306253.306592	0.022	0.026	0.021	0.037	0.00732575	29	306253	306592	Gene_del_Partial	NA	PTET.51.1.G0290179
MILORD.29.355834.355848	0.058	0.054	0.082	0.054	0.013466	29	355834	355848	Gene_del_Partial	NA	PTET.51.1.G0290205
MILORD.29.413268.413317	0.04	0.009	0.01	0.013	0.0147648	29	413268	413317	Gene_del_Partial	NA	PTET.51.1.G0290246
MILORD.29.441258.441262	0.041	0.013	0.014	0.013	0.0138414	29	441258	441262	Gene_del_Partial	NA	PTET.51.1.G0290258
MILORD.295.3042.3086	0.043	0.016	0.042	0.024	0.0134009	295	3042	3086	Gene_del_Partial	NA	PTET.51.1.G2950002
MILORD.296.6841.6917	0.034	0.039	0.031	0.188	0.0767376	296	6841	6917	Gene_del_Partial	NA	PTET.51.1.G2960002
MILORD.3.671506.671549	0.017	0.026	0.025	0.017	0.00492443	3	671506	671549	Gene_del_Partial	NA	PTET.51.1.G0030401
MILORD.30.368642.368653	0.089	0.096	0.194	0.091	0.0510849	30	368642	368653	Gene_del_Partial	NA	PTET.51.1.G0300227
MILORD.307.8853.8916	0.034	0.033	0.071	0.045	0.0176895	307	8853	8916	Gene_del_Partial	NA	PTET.51.1.G3070004
MILORD.312.1553.1566	0.019	0.024	0.038	0.053	0.0152862	312	1553	1566	Gene_del_Partial	NA	PTET.51.1.G3120001
MILORD.32.278115.278132	0.125	0.059	0.091	0.25	0.0836276	32	278115	278132	Gene_del_Partial	NA	PTET.51.1.G0320157
MILORD.32.278122.278132	0.455	0.263	0.267	0.6	0.162713	32	278122	278132	Gene_del_Partial	NA	PTET.51.1.G0320157
MILORD.32.406273.406334	0.75	0.731	0.65	0.643	0.0548969	32	406273	406334	Gene_del_Partial	Stable	PTET.51.1.G0320237
MILORD.323.1571.1576	0.167	0.227	0.3	0.286	0.060866	323	1571	1576	Gene_del_Partial	NA	PTET.51.1.G3230001
MILORD.33.520946.520989	0.021	0.062	0.023	0.065	0.0240052	33	520946	520989	Gene_del_Partial	NA	PTET.51.1.G0330356
MILORD.33.89177.89201	0.02	0.016	0.021	0.022	0.00262996	33	89177	89201	Gene_del_Partial	NA	PTET.51.1.G0330055
MILORD.34.134024.134028	0.025	0.078	0.15	0.29	0.114887	34	134024	134028	Gene_del_Partial	NA	PTET.51.1.G0340083
MILORD.35.376312.376334	0.061	0.024	0.018	0.037	0.0190613	35	376312	376334	Gene_del_Partial	NA	PTET.51.1.G0350237
MILORD.35.6126.6130	0.246	0.029	0.073	0.039	0.101267	35	6126	6130	Gene_del_Partial	NA	PTET.51.1.G0350003
MILORD.36.10973.11103	0.053	0.175	0.132	0.255	0.0843144	36	10973	11103	Gene_del_Partial	NA	PTET.51.1.G0360003
MILORD.36.271670.271698	0.015	0.053	0.044	0.114	0.0416213	36	271670	271698	Gene_del_Partial	NA	PTET.51.1.G0360142
MILORD.37.499411.499490	0.565	0.81	0.158	0.087	0.342422	37	499411	499490	Gene_del_Partial	Unstable	PTET.51.1.G0370302
MILORD.38.439336.439354	0.014	0.013	0.024	0.016	0.00499166	38	439336	439354	Gene_del_Partial	NA	PTET.51.1.G0380268
MILORD.38.97090.97106	0.3	0.41	0.75	0.298	0.213513	38	97090	97106	Gene_del_Partial	Unstable	PTET.51.1.G0380063
MILORD.39.118802.118829	0.019	0.01	0.017	0.02	0.00450925	39	118802	118829	Gene_del_Partial	NA	PTET.51.1.G0390074
MILORD.4.227152.227182	0.028	0.028	0.015	0.016	0.00722842	4	227152	227182	Gene_del_Partial	NA	PTET.51.1.G0040127
MILORD.40.288110.288126	0.082	0.113	0.187	0.121	0.0441616	40	288110	288126	Gene_del_Partial	NA	PTET.51.1.G0400178
MILORD.40.329280.329333	0.051	0.018	0.029	0.012	0.0171756	40	329280	329333	Gene_del_Partial	NA	PTET.51.1.G0400204
MILORD.40.329903.329962	0.308	0.036	0.077	0.181	0.121448	40	329903	329962	Gene_del_Partial	NA	PTET.51.1.G0400204
MILORD.41.185909.185920	0.023	0.014	0.019	0.076	0.0289021	41	185909	185920	Gene_del_Partial	NA	PTET.51.1.G0410100
MILORD.41.481909.481980	0.017	0.069	0.033	0.059	0.0237978	41	481909	481980	Gene_del_Partial	NA	PTET.51.1.G0410292
MILORD.41.85964.86009	0.026	0.017	0.016	0.026	0.0055	41	85964	86009	Gene_del_Partial	NA	PTET.51.1.G0410044
MILORD.42.268119.268166	0.016	0.012	0.015	0.02	0.00330404	42	268119	268166	Gene_del_Partial	NA	PTET.51.1.G0420173
MILORD.42.8804.8829	0.016	0.051	0.057	0.286	0.123662	42	8804	8829	Gene_del_Partial	NA	PTET.51.1.G0420011
MILORD.43.474455.474555	0.091	0.026	0.042	0.014	0.0338366	43	474455	474555	Gene_del_Partial	NA	PTET.51.1.G0430293
MILORD.43.474519.474588	0.056	0.102	0.1	0.019	0.03966	43	474519	474588	Gene_del_Partial	NA	PTET.51.1.G0430293
MILORD.44.340819.340895	0.02	0.033	0.031	0.072	0.0227303	44	340819	340895	Gene_del_Partial	NA	PTET.51.1.G0440203
MILORD.44.7252.7280	0.014	0.02	0.042	0.09	0.0345012	44	7252	7280	Gene_del_Partial	NA	PTET.51.1.G0440004
MILORD.45.86407.86417	0.02	0.033	0.027	0.011	0.00946485	45	86407	86417	Gene_del_Partial	NA	PTET.51.1.G0450055
MILORD.46.222017.222136	0.018	0.016	0.014	0.044	0.0140949	46	222017	222136	Gene_del_Partial	NA	PTET.51.1.G0460148
MILORD.46.472895.472923	0.026	0.022	0.029	0.027	0.00294392	46	472895	472923	Gene_del_Partial	NA	PTET.51.1.G0460301
MILORD.47.14682.14707	1	1	1	1	0	47	14682	14707	Gene_del_Partial	NA	PTET.51.1.G0470006
MILORD.474.2854.2859	0.132	0.02	0.049	0.25	0.103077	474	2854	2859	Gene_del_Partial	NA	PTET.51.1.G4740002
MILORD.48.215633.215675	0.015	0.091	0.019	0.045	0.0349619	48	215633	215675	Gene_del_Partial	NA	PTET.51.1.G0480117
MILORD.48.397102.397260	0.067	0.018	0.077	0.095	0.0329381	48	397102	397260	Gene_del_Partial	NA	PTET.51.1.G0480221
MILORD.489.1435.1445	0.24	0.023	0.025	0.039	0.10574	489	1435	1445	Gene_del_Partial	NA	PTET.51.1.G4890001
MILORD.49.337775.337814	0.021	0.012	0.029	0.015	0.0075	49	337775	337814	Gene_del_Partial	NA	PTET.51.1.G0490198
MILORD.49.460812.460827	0.085	0.062	0.152	0.101	0.0381838	49	460812	460827	Gene_del_Partial	NA	PTET.51.1.G0490276
MILORD.49.463383.463464	0.043	0.938	0.096	0.259	0.413024	49	463383	463464	Gene_del_Partial	Unstable	PTET.51.1.G0490277
MILORD.49.95590.95620	0.019	0.015	0.013	0.013	0.00282843	49	95590	95620	Gene_del_Partial	NA	PTET.51.1.G0490057
MILORD.5.370593.370653	0.111	0.024	0.02	0.055	0.0420198	5	370593	370653	Gene_del_Partial	NA	PTET.51.1.G0050231
MILORD.5.677781.677807	0.024	0.013	0.02	0.016	0.00478714	5	677781	677807	Gene_del_Partial	NA	PTET.51.1.G0050403
MILORD.50.305118.305135	0.065	0.114	0.065	0.026	0.0360416	50	305118	305135	Gene_del_Partial	NA	PTET.51.1.G0500193
MILORD.50.305166.305183	0.16	0.226	0.056	0.071	0.0797094	50	305166	305183	Gene_del_Partial	NA	PTET.51.1.G0500193
MILORD.50.343322.343386	0.023	0.026	0.031	0.027	0.00330404	50	343322	343386	Gene_del_Partial	NA	PTET.51.1.G0500219
MILORD.51.119302.119353	0.053	0.065	0.13	0.111	0.0366731	51	119302	119353	Gene_del_Partial	NA	PTET.51.1.G0510060
MILORD.51.420802.420840	0.042	0.012	0.014	0.016	0.0140949	51	420802	420840	Gene_del_Partial	NA	PTET.51.1.G0510207
MILORD.51.447933.447971	0.019	0.011	0.019	0.015	0.00382971	51	447933	447971	Gene_del_Partial	NA	PTET.51.1.G0510220
MILORD.52.132998.133028	0.016	0.022	0.015	0.013	0.00387298	52	132998	133028	Gene_del_Partial	NA	PTET.51.1.G0520092
MILORD.53.123664.123858	1	1	1	0.935	0.0325	53	123664	123858	Gene_del_Partial	Stable	PTET.51.1.G0530071
MILORD.54.228186.228223	0.282	0.1	0.052	0.071	0.105693	54	228186	228223	Gene_del_Partial	NA	PTET.51.1.G0540125
MILORD.55.109908.109944	0.016	0.017	0.017	0.015	0.000957427	55	109908	109944	Gene_del_Partial	NA	PTET.51.1.G0550078
MILORD.55.39404.39428	0.036	0.016	0.014	0.011	0.0113541	55	39404	39428	Gene_del_Partial	NA	PTET.51.1.G0550025
MILORD.55.39404.39478	0.022	0.039	0.034	0.023	0.00834666	55	39404	39478	Gene_del_Partial	NA	PTET.51.1.G0550025	PTET.51.1.G0550026
MILORD.56.215143.215196	0.026	0.024	0.061	0.02	0.0189978	56	215143	215196	Gene_del_Partial	NA	PTET.51.1.G0560140
MILORD.56.351143.351176	0.077	0.014	0.045	0.014	0.0301164	56	351143	351176	Gene_del_Partial	NA	PTET.51.1.G0560214
MILORD.56.413616.413660	0.015	0.011	0.048	0.308	0.142634	56	413616	413660	Gene_del_Partial	NA	PTET.51.1.G0560256
MILORD.56.420565.420590	0.032	0.09	0.138	0.055	0.0461402	56	420565	420590	Gene_del_Partial	NA	PTET.51.1.G0560260
MILORD.57.2152.2258	0.011	0.013	0.014	0.023	0.00531507	57	2152	2258	Gene_del_Partial	NA	PTET.51.1.G0570002
MILORD.57.309643.309669	0.171	0.158	0.151	0.105	0.0287214	57	309643	309669	Gene_del_Partial	NA	PTET.51.1.G0570172
MILORD.57.448837.448850	0.016	0.021	0.023	0.016	0.00355903	57	448837	448850	Gene_del_Partial	NA	PTET.51.1.G0570241
MILORD.57.92874.92919	0.183	0.793	0.714	0.492	0.273201	57	92874	92919	Gene_del_Partial	Unstable	PTET.51.1.G0570048
MILORD.58.313907.314094	0.083	0.038	0.286	0.037	0.118623	58	313907	314094	Gene_del_Partial	NA	PTET.51.1.G0580170
MILORD.58.320244.320292	0.08	0.015	0.014	0.02	0.0319414	58	320244	320292	Gene_del_Partial	NA	PTET.51.1.G0580173
MILORD.6.236571.236597	0.112	0.052	0.037	0.023	0.0391663	6	236571	236597	Gene_del_Partial	NA	PTET.51.1.G0060148
MILORD.6.53239.53283	0.167	0.111	0.125	0.25	0.0625373	6	53239	53283	Gene_del_Partial	NA	PTET.51.1.G0060037
MILORD.60.254487.254513	0.025	0.013	0.032	0.016	0.00866025	60	254487	254513	Gene_del_Partial	NA	PTET.51.1.G0600136
MILORD.60.255285.255345	0.524	0.6	0.03	0.065	0.299004	60	255285	255345	Gene_del_Partial	Unstable	PTET.51.1.G0600137
MILORD.60.28189.28194	0.171	0.033	0.256	0.15	0.0919076	60	28189	28194	Gene_del_Partial	NA	PTET.51.1.G0600015
MILORD.60.424863.424891	0.077	0.188	0.111	0.034	0.0651281	60	424863	424891	Gene_del_Partial	NA	PTET.51.1.G0600244
MILORD.61.5985.6032	1	0.182	0.412	0.394	0.351221	61	5985	6032	Gene_del_Partial	Stable	PTET.51.1.G0610005
MILORD.61.5988.6032	1	0.533	0.636	0.6	0.209559	61	5988	6032	Gene_del_Partial	Stable	PTET.51.1.G0610005
MILORD.61.6988.7015	0.026	0.062	0.017	0.03	0.0196023	61	6988	7015	Gene_del_Partial	NA	PTET.51.1.G0610007
MILORD.62.221216.221262	0.016	0.013	0.017	0.022	0.00374166	62	221216	221262	Gene_del_Partial	NA	PTET.51.1.G0620145
MILORD.62.225709.225750	0.035	0.017	0.032	0.026	0.00793725	62	225709	225750	Gene_del_Partial	NA	PTET.51.1.G0620148
MILORD.62.337846.337851	0.086	0.015	0.031	0.012	0.0343608	62	337846	337851	Gene_del_Partial	NA	PTET.51.1.G0620209
MILORD.62.337852.337856	0.442	0.074	0.079	0.023	0.19333	62	337852	337856	Gene_del_Partial	NA	PTET.51.1.G0620209
MILORD.62.408386.408395	0.029	0.035	0.018	0.045	0.0112953	62	408386	408395	Gene_del_Partial	NA	PTET.51.1.G0620256
MILORD.63.369369.369373	0.1	0.015	0.014	0.034	0.0405576	63	369369	369373	Gene_del_Partial	NA	PTET.51.1.G0630220
MILORD.63.46461.46476	0.047	0.013	0.014	0.026	0.0158114	63	46461	46476	Gene_del_Partial	NA	PTET.51.1.G0630033
MILORD.64.270435.270477	0.017	0.011	0.028	0.019	0.00704154	64	270435	270477	Gene_del_Partial	NA	PTET.51.1.G0640160
MILORD.65.235807.235815	0.028	0.012	0.027	0.114	0.0464139	65	235807	235815	Gene_del_Partial	NA	PTET.51.1.G0650133
MILORD.65.243823.243852	0.015	0.035	0.032	0.034	0.0094163	65	243823	243852	Gene_del_Partial	NA	PTET.51.1.G0650137
MILORD.66.333722.333764	0.016	0.011	0.013	0.014	0.00208167	66	333722	333764	Gene_del_Partial	NA	PTET.51.1.G0660216
MILORD.66.351616.351664	0.027	0.012	0.023	0.014	0.00716473	66	351616	351664	Gene_del_Partial	NA	PTET.51.1.G0660230
MILORD.68.184995.185099	0.167	0.143	0.25	0.167	0.0468855	68	184995	185099	Gene_del_Partial	NA	PTET.51.1.G0680108
MILORD.68.185055.185130	0.25	0.111	0.2	0.158	0.0592867	68	185055	185130	Gene_del_Partial	NA	PTET.51.1.G0680108
MILORD.68.384940.385018	0.538	0.75	0.167	0.619	0.250083	68	384940	385018	Gene_del_Partial	Unstable	PTET.51.1.G0680203
MILORD.68.392853.392897	0.045	0.143	0.082	0.136	0.0464937	68	392853	392897	Gene_del_Partial	NA	PTET.51.1.G0680206
MILORD.69.214444.214931	0.044	0.01	0.05	0.018	0.019485	69	214444	214931	Gene_del_Partial	NA	PTET.51.1.G0690107
MILORD.69.379467.379510	0.026	0.022	0.023	0.034	0.00543906	69	379467	379510	Gene_del_Partial	NA	PTET.51.1.G0690203
MILORD.7.11231.11259	0.014	0.016	0.013	0.042	0.0138894	7	11231	11259	Gene_del_Partial	NA	PTET.51.1.G0070004
MILORD.7.478203.478298	0.047	0.013	0.029	0.022	0.0144078	7	478203	478298	Gene_del_Partial	NA	PTET.51.1.G0070301
MILORD.7.507695.507706	0.058	0.013	0.157	0.106	0.0619919	7	507695	507706	Gene_del_Partial	NA	PTET.51.1.G0070319
MILORD.7.699092.699140	0.015	0.012	0.02	0.04	0.0126062	7	699092	699140	Gene_del_Partial	NA	PTET.51.1.G0070448
MILORD.73.294951.294976	0.241	0.243	0.234	0.234	0.00469042	73	294951	294976	Gene_del_Partial	NA	PTET.51.1.G0730178
MILORD.73.317062.317067	0.071	0.176	0.235	0.308	0.100135	73	317062	317067	Gene_del_Partial	NA	PTET.51.1.G0730190
MILORD.74.1693.1749	0.024	0.018	0.048	0.407	0.188945	74	1693	1749	Gene_del_Partial	NA	PTET.51.1.G0740001
MILORD.74.202187.202195	0.68	0.846	0.75	0.429	0.178326	74	202187	202195	Gene_del_Partial	NA	PTET.51.1.G0740114
MILORD.74.350153.350253	0.138	0.315	0.254	0.471	0.13869	74	350153	350253	Gene_del_Partial	NA	PTET.51.1.G0740204
MILORD.74.73732.73759	0.039	0.013	0.014	0.01	0.0134412	74	73732	73759	Gene_del_Partial	NA	PTET.51.1.G0740043
MILORD.75.16899.16963	0.043	0.021	0.023	0.032	0.0100457	75	16899	16963	Gene_del_Partial	NA	PTET.51.1.G0750009
MILORD.75.21258.21339	0.172	0.343	0.238	0.357	0.0881306	75	21258	21339	Gene_del_Partial	NA	PTET.51.1.G0750010
MILORD.75.347276.347301	0.035	0.012	0.017	0.032	0.011225	75	347276	347301	Gene_del_Partial	NA	PTET.51.1.G0750206
MILORD.76.193421.194112	0.882	0.846	1	0.913	0.0657996	76	193421	194112	Gene_del_Partial	Stable	PTET.51.1.G0760117
MILORD.78.288417.288441	0.016	0.027	0.029	0.16	0.0682398	78	288417	288441	Gene_del_Partial	NA	PTET.51.1.G0780168
MILORD.78.38016.38045	0.02	0.011	0.016	0.015	0.00369685	78	38016	38045	Gene_del_Partial	NA	PTET.51.1.G0780026
MILORD.8.491805.492263	0.03	0.021	0.018	0.061	0.0196723	8	491805	492263	Gene_del_Partial	NA	PTET.51.1.G0080317
MILORD.8.731317.731343	0.067	0.7	0.3	0.182	0.275447	8	731317	731343	Gene_del_Partial	Unstable	PTET.51.1.G0080457
MILORD.80.120296.120477	0.061	0.026	0.038	0.039	0.0145831	80	120296	120477	Gene_del_Partial	NA	PTET.51.1.G0800087
MILORD.80.120478.120483	0.05	0.03	0.167	0.071	0.0606877	80	120478	120483	Gene_del_Partial	NA	PTET.51.1.G0800087
MILORD.81.110805.110842	0.033	0.017	0.045	0.03	0.0115	81	110805	110842	Gene_del_Partial	NA	PTET.51.1.G0810065
MILORD.81.339787.339820	0.015	0.016	0.02	0.024	0.00411299	81	339787	339820	Gene_del_Partial	NA	PTET.51.1.G0810204
MILORD.81.347165.347219	0.152	0.025	0.185	0.079	0.0720526	81	347165	347219	Gene_del_Partial	NA	PTET.51.1.G0810210
MILORD.82.176855.176885	0.208	0.043	0.033	0.015	0.0895856	82	176855	176885	Gene_del_Partial	NA	PTET.51.1.G0820105
MILORD.82.302490.302556	0.875	0.66	0.688	0.808	0.101148	82	302490	302556	Gene_del_Partial	Stable	PTET.51.1.G0820191
MILORD.82.6149.6215	0.048	0.077	0.765	0.12	0.342945	82	6149	6215	Gene_del_Partial	Unstable	PTET.51.1.G0820002
MILORD.84.122539.122547	0.01	0.012	0.027	0.01	0.00822091	84	122539	122547	Gene_del_Partial	NA	PTET.51.1.G0840067
MILORD.84.5874.6906	0.5	0.2	0.778	0.368	0.244117	84	5874	6906	Gene_del_Total	Stable	PTET.51.1.G0840003	PTET.51.1.G0840002
MILORD.84.68764.68819	0.019	0.023	0.031	0.012	0.007932	84	68764	68819	Gene_del_Partial	NA	PTET.51.1.G0840038
MILORD.85.134355.134439	0.015	0.011	0.018	0.018	0.00331662	85	134355	134439	Gene_del_Partial	NA	PTET.51.1.G0850087
MILORD.85.281370.282760	0.5	0.5	0.333	0.667	0.136355	85	281370	282760	Gene_del_Total	NA	PTET.51.1.G0850179
MILORD.85.281370.282855	0.889	0.923	0.84	0.957	0.0499291	85	281370	282855	Gene_del_Total	Stable	PTET.51.1.G0850179
MILORD.86.53084.53130	0.375	0.121	0.061	0.041	0.154129	86	53084	53130	Gene_del_Partial	NA	PTET.51.1.G0860036
MILORD.86.53097.53124	0.1	0.081	0.042	0.02	0.0363444	86	53097	53124	Gene_del_Partial	NA	PTET.51.1.G0860036
MILORD.87.40906.40931	0.03	0.013	0.029	0.014	0.00925563	87	40906	40931	Gene_del_Partial	NA	PTET.51.1.G0870018
MILORD.88.40748.40781	0.024	0.013	0.025	0.018	0.00559762	88	40748	40781	Gene_del_Partial	NA	PTET.51.1.G0880016
MILORD.89.11029.11109	0.684	1	1	1	0.158	89	11029	11109	Gene_del_Partial	Stable	PTET.51.1.G0890015
MILORD.89.205043.205087	0.029	0.018	0.035	0.05	0.0133417	89	205043	205087	Gene_del_Partial	NA	PTET.51.1.G0890129
MILORD.89.229230.229234	0.061	0.031	0.025	0.072	0.022809	89	229230	229234	Gene_del_Partial	NA	PTET.51.1.G0890143
MILORD.89.23412.23430	0.135	0.072	0.051	0.05	0.039975	89	23412	23430	Gene_del_Partial	NA	PTET.51.1.G0890017
MILORD.9.510870.510925	0.041	0.074	0.065	0.074	0.0155885	9	510870	510925	Gene_del_Partial	NA	PTET.51.1.G0090289
MILORD.90.324151.324181	0.024	0.015	0.026	0.019	0.00496655	90	324151	324181	Gene_del_Partial	NA	PTET.51.1.G0900217
MILORD.91.174495.174533	0.074	0.117	0.096	0.077	0.019883	91	174495	174533	Gene_del_Partial	NA	PTET.51.1.G0910098
MILORD.91.99408.99435	0.14	0.012	0.03	0.024	0.0594727	91	99408	99435	Gene_del_Partial	NA	PTET.51.1.G0910054
MILORD.92.14259.14344	0.029	0.057	0.054	0.056	0.0133915	92	14259	14344	Gene_del_Partial	NA	PTET.51.1.G0920004
MILORD.94.152470.152514	0.022	0.051	0.019	0.03	0.0144338	94	152470	152514	Gene_del_Partial	NA	PTET.51.1.G0940096
MILORD.94.6577.6633	0.308	1	0.935	0.931	0.325208	94	6577	6633	Gene_del_Partial	Unstable	PTET.51.1.G0940004
MILORD.95.209204.209231	0.019	0.015	0.017	0.015	0.00191485	95	209204	209231	Gene_del_Partial	NA	PTET.51.1.G0950123
MILORD.95.84048.87435	0.019	0.033	0.055	0.031	0.015	95	84048	87435	Gene_del_Total	NA	PTET.51.1.G0950055	PTET.51.1.G0950056	PTET.51.1.G0950057
MILORD.95.87262.87358	0.046	0.045	0.045	0.153	0.0538354	95	87262	87358	Gene_del_Partial	NA	PTET.51.1.G0950057
MILORD.96.107114.107174	0.089	0.016	0.019	0.017	0.035855	96	107114	107174	Gene_del_Partial	NA	PTET.51.1.G0960058
MILORD.96.310959.310974	0.015	0.027	0.051	0.098	0.0366913	96	310959	310974	Gene_del_Partial	NA	PTET.51.1.G0960188
MILORD.97.132333.132563	0.306	0.025	0.041	0.024	0.13822	97	132333	132563	Gene_del_Partial	NA	PTET.51.1.G0970093
MILORD.97.72376.72403	0.013	0.02	0.013	0.011	0.00394757	97	72376	72403	Gene_del_Partial	NA	PTET.51.1.G0970055
MILORD.98.91662.91672	0.049	0.082	0.068	0.038	0.0195853	98	91662	91672	Gene_del_Partial	NA	PTET.51.1.G0980069
MILORD.99.309703.309932	0.026	0.061	0.04	0.033	0.0151217	99	309703	309932	Gene_del_Partial	NA	PTET.51.1.G0990187

## Sheet: Legend S1
Supplemental Table S1. Catalog of TA-bound somatic deletions that affect genes. Sample-specific columns with equivalent content are collectively described (names ending with x), while in the table they include a unique identifier specifying the temperature during autogamy and the sexual generation of the individual samples (25 F0, 18 F1, 25 F1 & 32 F1).
DELETION_ID	unique deletion identifier (as assigned by ParTIES MILORD)
DS_x	deletion score
SD	standard deviation of the deletion scores
SCAFFOLD	the scaffold on which the deletion falls
START	smallest genomic coordinate of the deletion
END	highest genomic coordinate of the deletion
DELETION TYPE	whether the deletion contains a gene partially or completely
STABILITY	tags manually revised deletions as either unstable (SD > 0.3) or stable (DS >0.5 in all samples)
GENE ID1, GENE ID2 & GENE ID3	ID(s) of gene(s) affected by the deletion
