# Supplementary material for: Environmentally induced plasticity of programmed DNA elimination boosts somatic variability in Paramecium tetraurelia
Source: HighWire-hosted journal article supplement (doi:10.1101/gr.245332.118), 2019-09-23
Supplement: Supplemental_Figures_and_Tables.zip [file Supplemental_Table_S3.xlsx]

## Sheet: Table S3
GENE_ID	IES_ID	GENE_DESCRIPTION	DCL2_3_SENSITIVE	DCL5_SENSITIVE
PTET.51.1.G1000080	IESPGM.PTET51.1.100.137987	Tubulin	False	False
NA	IESPGM.PTET51.1.100.54418	NA	False	True
NA	IESPGM.PTET51.1.100.64557	NA	False	False
PTET.51.1.G1000045	IESPGM.PTET51.1.100.67583	Zinc finger, RING/FYVE/PHD-type	False	False
PTET.51.1.G1000001	IESPGM.PTET51.1.100.774	Tetratricopeptide repeat-containing domain	False	False
NA	IESPGM.PTET51.1.101.206650	NA	False	False
PTET.51.1.G1010183	IESPGM.PTET51.1.101.279756	NA	False	False
NA	IESPGM.PTET51.1.101.287245	NA	False	False
PTET.51.1.G1020012	IESPGM.PTET51.1.102.18202	WD40-repeat-containing domain	False	True
PTET.51.1.G1020190	IESPGM.PTET51.1.102.289164	Coiled coil domain	False	False
PTET.51.1.G1020027	IESPGM.PTET51.1.102.40177	P-loop containing nucleoside triphosphate hydrolase	False	False
PTET.51.1.G1020057	IESPGM.PTET51.1.102.80247	Coiled coil domain	False	False
NA	IESPGM.PTET51.1.10.316328	NA	False	True
PTET.51.1.G1030142	IESPGM.PTET51.1.103.240181	Coiled coil domain	True	True
NA	IESPGM.PTET51.1.103.286904	NA	False	False
NA	IESPGM.PTET51.1.103.297466	NA	False	False
PTET.51.1.G1030184	IESPGM.PTET51.1.103.300361	NA	False	False
PTET.51.1.G1030018	IESPGM.PTET51.1.103.30131	NA	False	True
PTET.51.1.G1040079	IESPGM.PTET51.1.104.148844	Potassium channel, voltage-dependent, EAG/ELK/ERG	False	True
PTET.51.1.G1040082	IESPGM.PTET51.1.104.154771	NA	False	True
NA	IESPGM.PTET51.1.104.214984	NA	False	False
NA	IESPGM.PTET51.1.104.223165	NA	True	True
PTET.51.1.G1040138	IESPGM.PTET51.1.104.245002	NA	False	False
NA	IESPGM.PTET51.1.104.295930	NA	True	True
NA	IESPGM.PTET51.1.104.302738	NA	False	False
PTET.51.1.G1050069	IESPGM.PTET51.1.105.100667	NA	True	False
PTET.51.1.G1050084	IESPGM.PTET51.1.105.128719	Signal transduction histidine kinase, core	True	False
NA	IESPGM.PTET51.1.105.184443	NA	False	False
PTET.51.1.G1050144	IESPGM.PTET51.1.105.221552	P-loop containing nucleoside triphosphate hydrolase	False	False
PTET.51.1.G1050186	IESPGM.PTET51.1.105.289865	Coiled coil domain	False	True
NA	IESPGM.PTET51.1.105.300196	NA	False	True
NA	IESPGM.PTET51.1.105.8278	NA	False	False
NA	IESPGM.PTET51.1.106.103722	NA	False	False
PTET.51.1.G1060091	IESPGM.PTET51.1.106.123998	NA	False	False
NA	IESPGM.PTET51.1.106.159837	NA	False	False
NA	IESPGM.PTET51.1.106.50991	NA	False	False
NA	IESPGM.PTET51.1.107.224314	NA	False	False
PTET.51.1.G1070170	IESPGM.PTET51.1.107.293085	NA	False	True
NA	IESPGM.PTET51.1.107.296968	NA	False	True
NA	IESPGM.PTET51.1.107.3698	NA	False	False
PTET.51.1.G1070002	IESPGM.PTET51.1.107.4221	NA	False	False
PTET.51.1.G1080194	IESPGM.PTET51.1.108.277974	Tetratricopeptide-like helical domain	False	True
PTET.51.1.G1080199	IESPGM.PTET51.1.108.292971	NA	True	True
PTET.51.1.G1080058	IESPGM.PTET51.1.108.82624	NA	False	False
NA	IESPGM.PTET51.1.109.235290	NA	False	False
NA	IESPGM.PTET51.1.109.298569	NA	False	True
PTET.51.1.G1090020	IESPGM.PTET51.1.109.34801	WD40-repeat-containing domain	False	True
NA	IESPGM.PTET51.1.109.37075	NA	False	True
NA	IESPGM.PTET51.1.109.43597	NA	True	False
PTET.51.1.G1090023	IESPGM.PTET51.1.109.44918	Coiled coil domain	True	False
PTET.51.1.G1090002	IESPGM.PTET51.1.109.4845	NA	True	True
NA	IESPGM.PTET51.1.109.49899	NA	False	False
PTET.51.1.G1090040	IESPGM.PTET51.1.109.71895	Cyclic nucleotide-binding-like	False	False
PTET.51.1.G1100072	IESPGM.PTET51.1.110.117348	Insulin-like growth factor binding protein, N-terminal	False	False
PTET.51.1.G1100046	IESPGM.PTET51.1.110.71319	NA	False	False
PTET.51.1.G1110080	IESPGM.PTET51.1.111.145036	Tetratricopeptide-like helical domain	True	True
PTET.51.1.G1110080	IESPGM.PTET51.1.111.145416	Tetratricopeptide-like helical domain	False	False
NA	IESPGM.PTET51.1.111.147953	NA	True	False
NA	IESPGM.PTET51.1.111.156312	NA	False	False
PTET.51.1.G1110089	IESPGM.PTET51.1.111.164264	Coiled coil domain	False	False
NA	IESPGM.PTET51.1.111.165891	NA	False	True
PTET.51.1.G1110008	IESPGM.PTET51.1.111.25825	NA	False	False
NA	IESPGM.PTET51.1.111.26740	NA	False	False
PTET.51.1.G1110174	IESPGM.PTET51.1.111.298326	NA	True	False
PTET.51.1.G1120066	IESPGM.PTET51.1.112.113739	NA	False	True
PTET.51.1.G1120131	IESPGM.PTET51.1.112.223386	NA	False	False
PTET.51.1.G1120020	IESPGM.PTET51.1.112.31035	Protein YIPF1 homolog	True	False
PTET.51.1.G1120026	IESPGM.PTET51.1.112.45962	Coiled coil domain	False	False
PTET.51.1.G1130004	IESPGM.PTET51.1.113.12270	Tetratricopeptide repeat	False	True
PTET.51.1.G1130106	IESPGM.PTET51.1.113.191722	Paramecium surface antigen	True	False
PTET.51.1.G1130122	IESPGM.PTET51.1.113.212828	Ankyrin repeat-containing domain	False	True
NA	IESPGM.PTET51.1.11.336271	NA	False	False
PTET.51.1.G1130003	IESPGM.PTET51.1.113.9781	NA	False	False
PTET.51.1.G1140149	IESPGM.PTET51.1.114.271554	HAD-like domain	False	True
NA	IESPGM.PTET51.1.11.469217	NA	False	False
NA	IESPGM.PTET51.1.114.924	NA	False	False
PTET.51.1.G1150105	IESPGM.PTET51.1.115.174930	WD40-repeat-containing domain	True	True
NA	IESPGM.PTET51.1.115.242133	NA	False	False
PTET.51.1.G1150165	IESPGM.PTET51.1.115.285034	Coiled coil domain	True	True
PTET.51.1.G1150036	IESPGM.PTET51.1.115.61168	Methylpurine-DNA glycosylase (MPG)	False	True
PTET.51.1.G0110380	IESPGM.PTET51.1.11.592282	Sperm-tail PG-rich repeat	False	False
NA	IESPGM.PTET51.1.115.97633	NA	False	False
PTET.51.1.G1160065	IESPGM.PTET51.1.116.113015	Protein kinase-like domain	False	True
PTET.51.1.G1160010	IESPGM.PTET51.1.116.13055	NA	False	False
PTET.51.1.G1160110	IESPGM.PTET51.1.116.184019	P-loop containing nucleoside triphosphate hydrolase	False	False
NA	IESPGM.PTET51.1.11.621919	NA	False	False
NA	IESPGM.PTET51.1.116.228375	NA	False	False
NA	IESPGM.PTET51.1.116.275514	NA	False	False
PTET.51.1.G0110419	IESPGM.PTET51.1.11.647501	Galactose mutarotase-like domain	False	True
NA	IESPGM.PTET51.1.11.672700	NA	False	False
PTET.51.1.G1160046	IESPGM.PTET51.1.116.85176	Coiled coil domain	False	False
PTET.51.1.G1160053	IESPGM.PTET51.1.116.92794	Zinc finger, RING/FYVE/PHD-type	False	False
PTET.51.1.G1160058	IESPGM.PTET51.1.116.98569	NA	False	False
NA	IESPGM.PTET51.1.117.259433	NA	False	False
NA	IESPGM.PTET51.1.117.268618	NA	True	True
NA	IESPGM.PTET51.1.117.288696	NA	True	False
PTET.51.1.G1180012	IESPGM.PTET51.1.118.21132	Protein kinase-like domain	False	False
NA	IESPGM.PTET51.1.118.281421	NA	False	True
NA	IESPGM.PTET51.1.118.76843	NA	False	False
NA	IESPGM.PTET51.1.119.135031	NA	False	False
PTET.51.1.G1190106	IESPGM.PTET51.1.119.159152	WD40-repeat-containing domain	False	False
PTET.51.1.G1190147	IESPGM.PTET51.1.119.226019	Myb domain	False	True
PTET.51.1.G1190165	IESPGM.PTET51.1.119.256456	Tetratricopeptide repeat-containing domain	False	False
NA	IESPGM.PTET51.1.119.3687	NA	True	True
NA	IESPGM.PTET51.1.119.57416	NA	False	True
NA	IESPGM.PTET51.1.120.146598	NA	False	False
NA	IESPGM.PTET51.1.120.261389	NA	False	True
PTET.51.1.G1200155	IESPGM.PTET51.1.120.269561	NA	False	False
NA	IESPGM.PTET51.1.120.271096	NA	False	False
PTET.51.1.G1200024	IESPGM.PTET51.1.120.48106	Coiled coil domain	False	False
PTET.51.1.G1200032	IESPGM.PTET51.1.120.57363	Ankyrin repeat-containing domain	False	False
NA	IESPGM.PTET51.1.120.775	NA	False	False
PTET.51.1.G1200001	IESPGM.PTET51.1.120.903	Tetratricopeptide repeat-containing domain	False	True
NA	IESPGM.PTET51.1.121.13248	NA	False	False
NA	IESPGM.PTET51.1.121.137730	NA	True	False
NA	IESPGM.PTET51.1.121.178096	NA	True	False
NA	IESPGM.PTET51.1.121.198389	NA	False	False
PTET.51.1.G1210011	IESPGM.PTET51.1.121.20506	Major facilitator superfamily domain, general substrate transporter	True	True
PTET.51.1.G0120069	IESPGM.PTET51.1.12.121142	Peptidase M1, alanine aminopeptidase/leukotriene A4 hydrolase	False	False
PTET.51.1.G0120071	IESPGM.PTET51.1.12.122593	HTH CenpB-type DNA-binding domain	False	False
PTET.51.1.G1210046	IESPGM.PTET51.1.121.74543	NA	False	False
PTET.51.1.G1210048	IESPGM.PTET51.1.121.77408	Zinc finger, RING/FYVE/PHD-type	True	False
NA	IESPGM.PTET51.1.121.81883	NA	False	False
NA	IESPGM.PTET51.1.12.209176	NA	False	False
PTET.51.1.G1220006	IESPGM.PTET51.1.122.10794	NA	False	False
PTET.51.1.G1220071	IESPGM.PTET51.1.122.136487	MORN motif	False	False
NA	IESPGM.PTET51.1.122.17347	NA	False	False
NA	IESPGM.PTET51.1.12.260986	NA	False	False
PTET.51.1.G1220003	IESPGM.PTET51.1.122.6792	NA	False	False
PTET.51.1.G0120168	IESPGM.PTET51.1.12.276012	Ankyrin repeat-containing domain	False	False
NA	IESPGM.PTET51.1.1.227735	NA	False	False
NA	IESPGM.PTET51.1.123.18069	NA	False	False
PTET.51.1.G1230121	IESPGM.PTET51.1.123.218030	Coiled coil domain	False	True
NA	IESPGM.PTET51.1.12.328941	NA	False	False
NA	IESPGM.PTET51.1.124.141842	NA	False	True
NA	IESPGM.PTET51.1.124.154655	NA	False	False
NA	IESPGM.PTET51.1.124.202375	NA	True	True
PTET.51.1.G1240155	IESPGM.PTET51.1.124.259769	Coiled coil domain	False	False
PTET.51.1.G1240160	IESPGM.PTET51.1.124.265779	NA	False	False
NA	IESPGM.PTET51.1.12.435819	NA	False	False
PTET.51.1.G0120276	IESPGM.PTET51.1.12.454157	Coiled coil domain	False	False
NA	IESPGM.PTET51.1.12.465	NA	False	False
PTET.51.1.G1250135	IESPGM.PTET51.1.125.193052	NA	False	False
NA	IESPGM.PTET51.1.125.244360	NA	False	False
PTET.51.1.G1250179	IESPGM.PTET51.1.125.265559	Coiled coil domain	False	False
PTET.51.1.G1250034	IESPGM.PTET51.1.125.56548	Paramecium surface antigen	False	False
PTET.51.1.G0120344	IESPGM.PTET51.1.12.575473	Peptidyl-prolyl cis-trans isomerase, PpiC-type	False	False
PTET.51.1.G1260127	IESPGM.PTET51.1.126.223294	Coiled coil domain	True	True
PTET.51.1.G1260144	IESPGM.PTET51.1.126.254839	NA	False	False
PTET.51.1.G0120380	IESPGM.PTET51.1.12.629046	Intimal thickness related receptor, IRP	False	False
PTET.51.1.G1270053	IESPGM.PTET51.1.127.116149	NA	False	False
NA	IESPGM.PTET51.1.127.215300	NA	False	False
PTET.51.1.G1270001	IESPGM.PTET51.1.127.7834	Paramecium surface antigen	False	False
PTET.51.1.G1280073	IESPGM.PTET51.1.128.122192	Hedgehog signalling/DD-peptidase zinc-binding domain	False	False
NA	IESPGM.PTET51.1.128.21761	NA	False	False
PTET.51.1.G1280136	IESPGM.PTET51.1.128.235928	MORN motif	False	True
PTET.51.1.G1280141	IESPGM.PTET51.1.128.241574	Phosphotransferase KptA/Tpt1	False	False
PTET.51.1.G1300090	IESPGM.PTET51.1.130.137787	Protein kinase-like domain	True	False
NA	IESPGM.PTET51.1.130.39109	NA	True	True
NA	IESPGM.PTET51.1.130.5902	NA	False	False
NA	IESPGM.PTET51.1.130.8798	NA	False	False
PTET.51.1.G1310006	IESPGM.PTET51.1.131.10969	NA	True	True
NA	IESPGM.PTET51.1.131.11298	NA	False	False
PTET.51.1.G1310136	IESPGM.PTET51.1.131.255283	NA	True	True
NA	IESPGM.PTET51.1.131.71464	NA	True	True
NA	IESPGM.PTET51.1.132.167159	NA	False	False
NA	IESPGM.PTET51.1.132.22250	NA	False	False
PTET.51.1.G1320135	IESPGM.PTET51.1.132.249316	WD40-repeat-containing domain	False	True
PTET.51.1.G1320013	IESPGM.PTET51.1.132.28768	Tetratricopeptide repeat-containing domain	False	False
NA	IESPGM.PTET51.1.132.78418	NA	False	True
NA	IESPGM.PTET51.1.132.82181	NA	False	False
NA	IESPGM.PTET51.1.132.87472	NA	False	False
PTET.51.1.G0130192	IESPGM.PTET51.1.13.311246	NA	False	False
PTET.51.1.G1330020	IESPGM.PTET51.1.133.30120	Phospholipase D family	False	True
NA	IESPGM.PTET51.1.13.349159	NA	False	False
NA	IESPGM.PTET51.1.133.49282	NA	False	False
PTET.51.1.G1340126	IESPGM.PTET51.1.134.170408	Macro domain	False	False
PTET.51.1.G1340025	IESPGM.PTET51.1.134.31836	H-type lectin domain	False	False
NA	IESPGM.PTET51.1.13.457407	NA	False	False
PTET.51.1.G1350052	IESPGM.PTET51.1.135.103683	Immunoglobulin-like fold	False	False
PTET.51.1.G0130347	IESPGM.PTET51.1.13.555898	Cyclic nucleotide-binding-like	False	False
PTET.51.1.G0010217	IESPGM.PTET51.1.1.357229	NA	False	False
PTET.51.1.G0010219	IESPGM.PTET51.1.1.358366	NA	False	True
NA	IESPGM.PTET51.1.13.593038	NA	False	False
PTET.51.1.G1360011	IESPGM.PTET51.1.136.27879	Protein phosphatase 2C	False	False
NA	IESPGM.PTET51.1.13.640249	NA	False	False
NA	IESPGM.PTET51.1.13.653189	NA	False	False
NA	IESPGM.PTET51.1.136.77927	NA	False	False
NA	IESPGM.PTET51.1.137.35443	NA	False	False
NA	IESPGM.PTET51.1.1.379527	NA	False	True
NA	IESPGM.PTET51.1.1.379624	NA	False	False
PTET.51.1.G1380006	IESPGM.PTET51.1.138.14406	NA	False	False
PTET.51.1.G1380107	IESPGM.PTET51.1.138.161562	NA	False	True
PTET.51.1.G1380119	IESPGM.PTET51.1.138.179135	NA	False	False
PTET.51.1.G1380018	IESPGM.PTET51.1.138.30137	Tetratricopeptide-like helical domain	False	False
NA	IESPGM.PTET51.1.138.85635	NA	False	False
NA	IESPGM.PTET51.1.139.112539	NA	False	True
NA	IESPGM.PTET51.1.139.148097	NA	False	True
PTET.51.1.G1390116	IESPGM.PTET51.1.139.179561	NA	True	False
NA	IESPGM.PTET51.1.139.245682	NA	False	True
PTET.51.1.G1390013	IESPGM.PTET51.1.139.28663	NA	False	False
NA	IESPGM.PTET51.1.140.116953	NA	False	False
NA	IESPGM.PTET51.1.140.137494	NA	True	False
NA	IESPGM.PTET51.1.140.146962	NA	False	False
NA	IESPGM.PTET51.1.140.3328	NA	True	True
PTET.51.1.G0140003	IESPGM.PTET51.1.14.1030	NA	False	False
NA	IESPGM.PTET51.1.141.16968	NA	False	False
NA	IESPGM.PTET51.1.141.18699	NA	False	False
NA	IESPGM.PTET51.1.141.194159	NA	False	False
PTET.51.1.G1410046	IESPGM.PTET51.1.141.77663	NA	False	True
PTET.51.1.G1420005	IESPGM.PTET51.1.142.18825	Tetratricopeptide repeat	False	False
NA	IESPGM.PTET51.1.142.220320	NA	False	False
NA	IESPGM.PTET51.1.142.220533	NA	False	True
NA	IESPGM.PTET51.1.142.242550	NA	False	False
PTET.51.1.G0140171	IESPGM.PTET51.1.14.279509	Phosphatidyl serine synthase	False	False
NA	IESPGM.PTET51.1.143.173177	NA	True	False
PTET.51.1.G1430128	IESPGM.PTET51.1.143.231648	Tetratricopeptide-like helical domain	False	False
PTET.51.1.G1430129	IESPGM.PTET51.1.143.232286	Tetratricopeptide-like helical domain	False	False
NA	IESPGM.PTET51.1.143.238570	NA	False	True
NA	IESPGM.PTET51.1.14.325833	NA	False	False
PTET.51.1.G1430026	IESPGM.PTET51.1.143.27298	NA	True	False
PTET.51.1.G0140194	IESPGM.PTET51.1.14.331097	Acyl-CoA N-acyltransferase	False	False
PTET.51.1.G0140206	IESPGM.PTET51.1.14.356840	NA	False	False
PTET.51.1.G0140209	IESPGM.PTET51.1.14.365832	NA	True	True
NA	IESPGM.PTET51.1.14.376079	NA	False	False
PTET.51.1.G1430066	IESPGM.PTET51.1.143.98273	RNA recognition motif 2	True	True
PTET.51.1.G1440070	IESPGM.PTET51.1.144.125471	NA	False	False
PTET.51.1.G1440088	IESPGM.PTET51.1.144.159374	Coiled coil domain	False	False
PTET.51.1.G1440006	IESPGM.PTET51.1.144.20372	Tetratricopeptide repeat	False	False
PTET.51.1.G1440020	IESPGM.PTET51.1.144.42138	Sulphate transporter	False	False
NA	IESPGM.PTET51.1.14.448968	NA	False	False
PTET.51.1.G1450083	IESPGM.PTET51.1.145.135330	Mitochondrial substrate/solute carrier	False	False
PTET.51.1.G1450038	IESPGM.PTET51.1.145.77111	Protein N-terminal glutamine amidohydrolase, alpha beta roll	False	False
PTET.51.1.G1460006	IESPGM.PTET51.1.146.10216	Protein kinase domain	True	True
PTET.51.1.G1460060	IESPGM.PTET51.1.146.116597	Alpha/Beta hydrolase fold	True	True
PTET.51.1.G1460128	IESPGM.PTET51.1.146.241090	NA	True	False
PTET.51.1.G1460011	IESPGM.PTET51.1.146.28538	Insulin-like growth factor binding protein, N-terminal	False	True
PTET.51.1.G1470076	IESPGM.PTET51.1.147.101023	MT-A70-like	False	False
PTET.51.1.G1470118	IESPGM.PTET51.1.147.154630	Phosphotransferase KptA/Tpt1	True	True
NA	IESPGM.PTET51.1.147.183518	NA	False	True
PTET.51.1.G1470070	IESPGM.PTET51.1.147.92649	EF-hand domain pair	False	True
NA	IESPGM.PTET51.1.148.114026	NA	False	False
NA	IESPGM.PTET51.1.148.155188	NA	False	False
PTET.51.1.G1480154	IESPGM.PTET51.1.148.216240	Protein kinase-like domain	True	True
NA	IESPGM.PTET51.1.148.227184	NA	False	False
NA	IESPGM.PTET51.1.148.79929	NA	False	False
PTET.51.1.G1490002	IESPGM.PTET51.1.149.1113	Tetratricopeptide repeat-containing domain	False	True
PTET.51.1.G1490074	IESPGM.PTET51.1.149.123903	Mitochondrial import inner membrane translocase subunit Tim16	True	True
NA	IESPGM.PTET51.1.149.141721	NA	False	False
PTET.51.1.G1490003	IESPGM.PTET51.1.149.2052	NA	False	True
PTET.51.1.G1490017	IESPGM.PTET51.1.149.27328	Prokaryotic membrane lipoprotein lipid attachment site profile.	True	False
PTET.51.1.G1500005	IESPGM.PTET51.1.150.18733	von Willebrand factor, type A	True	True
NA	IESPGM.PTET51.1.150.196815	NA	False	True
PTET.51.1.G1500129	IESPGM.PTET51.1.150.228169	Insulin-like growth factor binding protein, N-terminal	False	True
NA	IESPGM.PTET51.1.150.36521	NA	False	False
PTET.51.1.G1500001	IESPGM.PTET51.1.150.4368	Tetratricopeptide repeat	False	False
PTET.51.1.G1500002	IESPGM.PTET51.1.150.9436	NA	False	False
NA	IESPGM.PTET51.1.151.141320	NA	False	False
PTET.51.1.G1510101	IESPGM.PTET51.1.151.147780	NA	False	True
NA	IESPGM.PTET51.1.151.1772	NA	False	False
NA	IESPGM.PTET51.1.151.50797	NA	False	False
NA	IESPGM.PTET51.1.15.167926	NA	False	True
NA	IESPGM.PTET51.1.151.78386	NA	False	False
NA	IESPGM.PTET51.1.15.19813	NA	False	False
PTET.51.1.G1520057	IESPGM.PTET51.1.152.104617	PHD-like zinc-binding domain	False	False
PTET.51.1.G1520062	IESPGM.PTET51.1.152.110370	NA	False	True
PTET.51.1.G1520133	IESPGM.PTET51.1.152.220356	Insulin-like growth factor binding protein, N-terminal	False	True
NA	IESPGM.PTET51.1.15.230931	NA	False	False
PTET.51.1.G1520009	IESPGM.PTET51.1.152.32119	Alpha-tubulin N-acetyltransferase	True	False
PTET.51.1.G1520002	IESPGM.PTET51.1.152.6380	NA	False	False
NA	IESPGM.PTET51.1.152.82546	NA	False	False
PTET.51.1.G1530107	IESPGM.PTET51.1.153.180229	HotDog domain	True	False
PTET.51.1.G1530115	IESPGM.PTET51.1.153.210193	Tetratricopeptide repeat	False	False
NA	IESPGM.PTET51.1.153.213547	NA	False	False
PTET.51.1.G1530120	IESPGM.PTET51.1.153.218312	Coiled coil domain	False	False
PTET.51.1.G1530014	IESPGM.PTET51.1.153.30415	Coiled coil domain	False	False
PTET.51.1.G1530017	IESPGM.PTET51.1.153.35575	Signal transduction histidine kinase, core	False	False
NA	IESPGM.PTET51.1.154.200951	NA	False	False
NA	IESPGM.PTET51.1.15.436916	NA	True	True
NA	IESPGM.PTET51.1.15.489368	NA	True	True
PTET.51.1.G0150279	IESPGM.PTET51.1.15.499499	Coiled coil domain	False	True
PTET.51.1.G1550133	IESPGM.PTET51.1.155.205746	Coiled coil domain	False	False
PTET.51.1.G1550139	IESPGM.PTET51.1.155.218936	NA	False	False
NA	IESPGM.PTET51.1.156.203872	NA	False	True
PTET.51.1.G1560121	IESPGM.PTET51.1.156.210340	NA	False	False
PTET.51.1.G1560122	IESPGM.PTET51.1.156.213431	WD40-repeat-containing domain	False	False
PTET.51.1.G1560024	IESPGM.PTET51.1.156.35689	NA	False	False
PTET.51.1.G0150370	IESPGM.PTET51.1.15.641408	Anoctamin	False	False
PTET.51.1.G1570005	IESPGM.PTET51.1.157.11174	NA	False	False
NA	IESPGM.PTET51.1.157.3506	NA	False	False
NA	IESPGM.PTET51.1.15.7540	NA	False	False
NA	IESPGM.PTET51.1.157.7200	NA	False	False
NA	IESPGM.PTET51.1.157.7393	NA	False	False
PTET.51.1.G0150028	IESPGM.PTET51.1.15.79527	NA	False	True
PTET.51.1.G0150028	IESPGM.PTET51.1.15.80411	NA	False	False
PTET.51.1.G1580049	IESPGM.PTET51.1.158.110683	Protein kinase-like domain	False	False
PTET.51.1.G1580052	IESPGM.PTET51.1.158.127962	Paramecium surface antigen	False	True
PTET.51.1.G1580054	IESPGM.PTET51.1.158.137156	Protein kinase-like domain	False	False
PTET.51.1.G1580064	IESPGM.PTET51.1.158.155836	NA	False	False
NA	IESPGM.PTET51.1.158.164463	NA	True	True
NA	IESPGM.PTET51.1.158.65815	NA	False	False
NA	IESPGM.PTET51.1.158.66071	NA	False	False
NA	IESPGM.PTET51.1.159.13950	NA	False	False
PTET.51.1.G1600087	IESPGM.PTET51.1.160.137155	Protein kinase-like domain	True	False
NA	IESPGM.PTET51.1.160.179226	NA	False	False
PTET.51.1.G1600037	IESPGM.PTET51.1.160.67011	NA	False	False
PTET.51.1.G1600009	IESPGM.PTET51.1.160.8661	Coiled coil domain	False	False
NA	IESPGM.PTET51.1.161.16345	NA	False	False
PTET.51.1.G1620073	IESPGM.PTET51.1.162.119789	Coiled coil domain	False	True
PTET.51.1.G1620106	IESPGM.PTET51.1.162.169703	NA	False	False
NA	IESPGM.PTET51.1.16.227851	NA	False	False
PTET.51.1.G0010033	IESPGM.PTET51.1.1.63155	Coiled coil domain	False	False
NA	IESPGM.PTET51.1.16.369607	NA	False	False
NA	IESPGM.PTET51.1.16.410742	NA	False	False
NA	IESPGM.PTET51.1.164.13175	NA	False	False
PTET.51.1.G1640125	IESPGM.PTET51.1.164.191750	Coiled coil domain	False	False
PTET.51.1.G0160288	IESPGM.PTET51.1.16.459501	Histidine phosphatase superfamily	False	False
PTET.51.1.G1650081	IESPGM.PTET51.1.165.121883	Coiled coil domain	False	False
NA	IESPGM.PTET51.1.165.200191	NA	False	True
NA	IESPGM.PTET51.1.165.530	NA	False	False
NA	IESPGM.PTET51.1.165.87689	NA	False	False
NA	IESPGM.PTET51.1.166.190436	NA	False	False
PTET.51.1.G1660110	IESPGM.PTET51.1.166.196557	Furin-like repeat	False	False
PTET.51.1.G1660110	IESPGM.PTET51.1.166.196640	Furin-like repeat	False	True
PTET.51.1.G1660001	IESPGM.PTET51.1.166.2369	Tetratricopeptide repeat	False	True
NA	IESPGM.PTET51.1.166.3967	NA	False	False
PTET.51.1.G1660046	IESPGM.PTET51.1.166.74091	NA	False	False
NA	IESPGM.PTET51.1.167.2131	NA	False	True
NA	IESPGM.PTET51.1.16.83654	NA	False	True
PTET.51.1.G1680027	IESPGM.PTET51.1.168.40731	Tetratricopeptide repeat	False	False
NA	IESPGM.PTET51.1.170.168879	NA	True	False
NA	IESPGM.PTET51.1.170.4506	NA	False	False
NA	IESPGM.PTET51.1.170.75907	NA	True	False
PTET.51.1.G1710077	IESPGM.PTET51.1.171.150604	tRNA isopentenyltransferase	True	True
PTET.51.1.G1710044	IESPGM.PTET51.1.171.91822	P-loop containing nucleoside triphosphate hydrolase	False	False
PTET.51.1.G1720001	IESPGM.PTET51.1.172.4037	Tetratricopeptide-like helical domain	False	True
PTET.51.1.G1720032	IESPGM.PTET51.1.172.63253	NA	True	False
PTET.51.1.G0170229	IESPGM.PTET51.1.17.397820	Coiled coil domain	True	False
NA	IESPGM.PTET51.1.174.62721	NA	False	False
NA	IESPGM.PTET51.1.17.475513	NA	False	False
PTET.51.1.G0010005	IESPGM.PTET51.1.1.7502	Tetratricopeptide-like helical domain	False	False
PTET.51.1.G1760007	IESPGM.PTET51.1.176.10219	NA	True	True
NA	IESPGM.PTET51.1.17.619666	NA	False	False
PTET.51.1.G1760013	IESPGM.PTET51.1.176.20516	NA	False	False
NA	IESPGM.PTET51.1.176.27074	NA	False	False
NA	IESPGM.PTET51.1.176.2824	NA	False	True
NA	IESPGM.PTET51.1.17.638467	NA	False	False
NA	IESPGM.PTET51.1.176.7285	NA	False	False
NA	IESPGM.PTET51.1.176.91405	NA	False	False
PTET.51.1.G1770085	IESPGM.PTET51.1.177.138207	NA	True	True
PTET.51.1.G1770038	IESPGM.PTET51.1.177.65888	Protein-tyrosine phosphatase-like	False	False
NA	IESPGM.PTET51.1.177.86746	NA	False	False
NA	IESPGM.PTET51.1.178.45362	NA	False	True
NA	IESPGM.PTET51.1.178.46871	NA	False	False
NA	IESPGM.PTET51.1.178.59438	NA	False	False
NA	IESPGM.PTET51.1.1.79207	NA	False	False
NA	IESPGM.PTET51.1.179.79511	NA	False	True
NA	IESPGM.PTET51.1.179.81453	NA	False	True
PTET.51.1.G1800017	IESPGM.PTET51.1.180.32673	NA	False	False
NA	IESPGM.PTET51.1.18.108980	NA	False	False
NA	IESPGM.PTET51.1.181.38593	NA	False	False
NA	IESPGM.PTET51.1.18.145078	NA	True	True
PTET.51.1.G0180007	IESPGM.PTET51.1.18.17609	WD40-repeat-containing domain	False	False
PTET.51.1.G0180001	IESPGM.PTET51.1.18.1924	Acyl-CoA N-acyltransferase	True	True
PTET.51.1.G1840008	IESPGM.PTET51.1.184.9826	NA	False	False
PTET.51.1.G0180018	IESPGM.PTET51.1.18.50716	Tetratricopeptide-like helical domain	False	False
NA	IESPGM.PTET51.1.185.29920	NA	False	False
PTET.51.1.G1850020	IESPGM.PTET51.1.185.30877	NA	False	False
NA	IESPGM.PTET51.1.18.55650	NA	True	True
NA	IESPGM.PTET51.1.18.567696	NA	False	True
PTET.51.1.G0180002	IESPGM.PTET51.1.18.6741	Insulin-like growth factor binding protein, N-terminal	False	True
PTET.51.1.G1870017	IESPGM.PTET51.1.187.25327	LNS2, Lipin/Ned1/Smp2	False	False
PTET.51.1.G1880013	IESPGM.PTET51.1.188.27337	NA	False	True
NA	IESPGM.PTET51.1.188.33832	NA	False	False
NA	IESPGM.PTET51.1.18.92670	NA	False	True
NA	IESPGM.PTET51.1.19.198419	NA	True	False
PTET.51.1.G1930001	IESPGM.PTET51.1.193.2264	NA	False	False
NA	IESPGM.PTET51.1.19.356625	NA	False	False
PTET.51.1.G0190233	IESPGM.PTET51.1.19.398885	Anamorsin	True	True
PTET.51.1.G0190267	IESPGM.PTET51.1.19.456142	NA	False	True
NA	IESPGM.PTET51.1.19.461579	NA	False	False
NA	IESPGM.PTET51.1.19.540195	NA	True	True
NA	IESPGM.PTET51.1.19.550278	NA	False	False
PTET.51.1.G0190341	IESPGM.PTET51.1.19.578103	Insulin-like growth factor binding protein, N-terminal	False	False
NA	IESPGM.PTET51.1.198.17574	NA	True	True
PTET.51.1.G1980002	IESPGM.PTET51.1.198.3595	NA	False	False
PTET.51.1.G0200081	IESPGM.PTET51.1.20.161833	Protein kinase-like domain	False	False
PTET.51.1.G0200086	IESPGM.PTET51.1.20.169871	NA	True	False
NA	IESPGM.PTET51.1.20.210760	NA	False	False
NA	IESPGM.PTET51.1.202.13978	NA	False	True
NA	IESPGM.PTET51.1.20.232132	NA	False	False
PTET.51.1.G0200021	IESPGM.PTET51.1.20.32199	Protein kinase-like domain	True	False
PTET.51.1.G0200002	IESPGM.PTET51.1.20.4584	NA	False	False
PTET.51.1.G0200292	IESPGM.PTET51.1.20.496162	Ammonium transporter	False	False
PTET.51.1.G0200332	IESPGM.PTET51.1.20.572794	Zinc finger, DHHC-type, palmitoyltransferase	False	False
PTET.51.1.G0200039	IESPGM.PTET51.1.20.65716	Aldolase-type TIM barrel	True	True
PTET.51.1.G0200051	IESPGM.PTET51.1.20.88131	Coiled coil domain	False	False
NA	IESPGM.PTET51.1.21.192293	NA	False	True
PTET.51.1.G0210116	IESPGM.PTET51.1.21.196836	Coiled coil domain	False	True
PTET.51.1.G0210120	IESPGM.PTET51.1.21.201646	NA	False	False
PTET.51.1.G0210124	IESPGM.PTET51.1.21.206803	NA	False	False
PTET.51.1.G0020069	IESPGM.PTET51.1.2.136237	NA	False	False
NA	IESPGM.PTET51.1.214.385	NA	True	False
NA	IESPGM.PTET51.1.21.512862	NA	False	False
NA	IESPGM.PTET51.1.22.403132	NA	False	True
PTET.51.1.G0220031	IESPGM.PTET51.1.22.43420	NA	False	True
PTET.51.1.G0220046	IESPGM.PTET51.1.22.70122	Coiled coil domain	False	False
NA	IESPGM.PTET51.1.2.287251	NA	False	False
PTET.51.1.G0230081	IESPGM.PTET51.1.23.134083	NA	False	False
NA	IESPGM.PTET51.1.23.252982	NA	False	False
PTET.51.1.G0020179	IESPGM.PTET51.1.2.346954	Epidermal growth factor-like domain	False	False
NA	IESPGM.PTET51.1.23.532252	NA	False	False
PTET.51.1.G0230318	IESPGM.PTET51.1.23.543010	Thioredoxin-like fold	False	False
NA	IESPGM.PTET51.1.235.452	NA	False	True
NA	IESPGM.PTET51.1.24.39131	NA	True	True
NA	IESPGM.PTET51.1.244.11235	NA	False	False
PTET.51.1.G0240242	IESPGM.PTET51.1.24.412344	Coiled coil domain	False	False
PTET.51.1.G0240320	IESPGM.PTET51.1.24.564037	Paramecium surface antigen	True	True
PTET.51.1.G0020257	IESPGM.PTET51.1.2.481827	FCH domain	False	True
NA	IESPGM.PTET51.1.25.280965	NA	False	False
PTET.51.1.G0020339	IESPGM.PTET51.1.2.600819	P-loop containing nucleoside triphosphate hydrolase	False	False
NA	IESPGM.PTET51.1.26.110482	NA	False	False
PTET.51.1.G0260075	IESPGM.PTET51.1.26.131085	Tensin phosphatase, lipid phosphatase domain	False	False
NA	IESPGM.PTET51.1.26.258971	NA	False	False
NA	IESPGM.PTET51.1.26.299128	NA	False	False
NA	IESPGM.PTET51.1.263.8195	NA	False	False
PTET.51.1.G0260270	IESPGM.PTET51.1.26.425650	NA	False	False
PTET.51.1.G0260292	IESPGM.PTET51.1.26.465991	EF-hand domain pair	False	False
PTET.51.1.G0260301	IESPGM.PTET51.1.26.486375	NA	False	True
NA	IESPGM.PTET51.1.26.542012	NA	False	False
NA	IESPGM.PTET51.1.26.551933	NA	False	False
NA	IESPGM.PTET51.1.27.326367	NA	False	True
PTET.51.1.G0270181	IESPGM.PTET51.1.27.345211	Coiled coil domain	False	False
PTET.51.1.G0020456	IESPGM.PTET51.1.2.783471	WD40-repeat-containing domain	True	True
NA	IESPGM.PTET51.1.2.797700	NA	False	False
NA	IESPGM.PTET51.1.28.147924	NA	False	False
PTET.51.1.G0280129	IESPGM.PTET51.1.28.206546	Cytochrome b5-like heme/steroid binding domain	False	False
PTET.51.1.G0280166	IESPGM.PTET51.1.28.286362	NA	False	True
PTET.51.1.G0280167	IESPGM.PTET51.1.28.288505	Coiled coil domain	False	False
PTET.51.1.G0280259	IESPGM.PTET51.1.28.413340	WD40 repeat	False	False
PTET.51.1.G0020535	IESPGM.PTET51.1.2.910913	Ankyrin repeat-containing domain	False	False
PTET.51.1.G0290080	IESPGM.PTET51.1.29.147884	Coiled coil domain	True	True
PTET.51.1.G0290155	IESPGM.PTET51.1.29.263775	NA	False	False
NA	IESPGM.PTET51.1.29.276391	NA	False	False
PTET.51.1.G0290170	IESPGM.PTET51.1.29.290145	Malate dehydrogenase, type 2	True	True
PTET.51.1.G0020547	IESPGM.PTET51.1.2.934909	GAF domain-like	False	False
NA	IESPGM.PTET51.1.29.368626	NA	False	False
PTET.51.1.G0290246	IESPGM.PTET51.1.29.417953	Paramecium surface antigen	False	False
PTET.51.1.G2940002	IESPGM.PTET51.1.294.2451	NA	False	False
PTET.51.1.G0300001	IESPGM.PTET51.1.30.11704	Paramecium surface antigen	False	False
NA	IESPGM.PTET51.1.30.127517	NA	False	False
NA	IESPGM.PTET51.1.301.7073	NA	False	False
NA	IESPGM.PTET51.1.307.867	NA	False	True
PTET.51.1.G3120004	IESPGM.PTET51.1.312.4680	Tetratricopeptide-like helical domain	False	False
PTET.51.1.G0310179	IESPGM.PTET51.1.31.333601	NA	False	False
PTET.51.1.G0310209	IESPGM.PTET51.1.31.377063	Protein kinase domain	False	False
PTET.51.1.G0310234	IESPGM.PTET51.1.31.411902	NA	False	True
PTET.51.1.G0310240	IESPGM.PTET51.1.31.422492	Coiled coil domain	False	False
PTET.51.1.G3140004	IESPGM.PTET51.1.314.4700	NA	False	False
PTET.51.1.G0310291	IESPGM.PTET51.1.31.506354	Pleckstrin homology domain	False	False
PTET.51.1.G0310028	IESPGM.PTET51.1.31.55534	P-loop containing nucleoside triphosphate hydrolase	True	False
PTET.51.1.G0310028	IESPGM.PTET51.1.31.57197	P-loop containing nucleoside triphosphate hydrolase	False	False
NA	IESPGM.PTET51.1.32.485386	NA	False	False
NA	IESPGM.PTET51.1.32.60876	NA	True	True
PTET.51.1.G0320041	IESPGM.PTET51.1.32.75511	Ankyrin repeat-containing domain	False	False
PTET.51.1.G3290002	IESPGM.PTET51.1.329.4615	Zinc finger, MIZ-type	False	False
NA	IESPGM.PTET51.1.32.96858	NA	False	False
PTET.51.1.G0330080	IESPGM.PTET51.1.33.125737	Furin-like repeat	False	True
PTET.51.1.G0330090	IESPGM.PTET51.1.33.142507	P-loop containing nucleoside triphosphate hydrolase	False	False
PTET.51.1.G0330134	IESPGM.PTET51.1.33.200046	Tetratricopeptide-like helical domain	False	False
NA	IESPGM.PTET51.1.33.206706	NA	False	False
NA	IESPGM.PTET51.1.33.214712	NA	False	False
NA	IESPGM.PTET51.1.33.25890	NA	False	False
NA	IESPGM.PTET51.1.33.295636	NA	False	False
NA	IESPGM.PTET51.1.333.5698	NA	True	False
NA	IESPGM.PTET51.1.33.380152	NA	True	True
NA	IESPGM.PTET51.1.33.439145	NA	False	False
PTET.51.1.G0330049	IESPGM.PTET51.1.33.77856	Domain of unknown function DUF125, transmembrane	False	False
PTET.51.1.G0340056	IESPGM.PTET51.1.34.100765	Zinc finger, TRAF-type	True	False
PTET.51.1.G0340165	IESPGM.PTET51.1.34.266504	NA	False	True
NA	IESPGM.PTET51.1.3.431837	NA	False	False
PTET.51.1.G0340213	IESPGM.PTET51.1.34.360950	NA	False	False
PTET.51.1.G0340253	IESPGM.PTET51.1.34.435851	Protein-tyrosine phosphatase-like	False	True
NA	IESPGM.PTET51.1.34.50860	NA	False	False
NA	IESPGM.PTET51.1.3.451642	NA	False	False
PTET.51.1.G0340026	IESPGM.PTET51.1.34.55231	NA	False	False
PTET.51.1.G0030278	IESPGM.PTET51.1.3.456160	Coiled coil domain	False	False
PTET.51.1.G0350093	IESPGM.PTET51.1.35.167250	Aspartic peptidase	False	False
NA	IESPGM.PTET51.1.35.201873	NA	True	True
PTET.51.1.G0350120	IESPGM.PTET51.1.35.208052	Coiled coil domain	False	False
PTET.51.1.G0350153	IESPGM.PTET51.1.35.248623	NA	False	False
NA	IESPGM.PTET51.1.35.319091	NA	False	False
PTET.51.1.G0350004	IESPGM.PTET51.1.35.6276	Globin, structural domain	True	False
NA	IESPGM.PTET51.1.361.909	NA	False	False
NA	IESPGM.PTET51.1.36.216319	NA	False	False
NA	IESPGM.PTET51.1.37.192913	NA	False	False
PTET.51.1.G0370130	IESPGM.PTET51.1.37.209392	Protein kinase-like domain	False	False
PTET.51.1.G3720004	IESPGM.PTET51.1.372.4294	NA	True	True
NA	IESPGM.PTET51.1.3.734513	NA	False	False
NA	IESPGM.PTET51.1.382.5916	NA	True	False
PTET.51.1.G0380190	IESPGM.PTET51.1.38.323491	Major facilitator superfamily domain, general substrate transporter	False	True
PTET.51.1.G0030517	IESPGM.PTET51.1.3.856966	Mitochondrial carrier domain	False	False
PTET.51.1.G0390065	IESPGM.PTET51.1.39.109101	Protein kinase-like domain	False	True
PTET.51.1.G3910001	IESPGM.PTET51.1.391.3156	Tetratricopeptide repeat	False	False
PTET.51.1.G0390091	IESPGM.PTET51.1.39.142954	NA	False	False
NA	IESPGM.PTET51.1.39.152580	NA	False	True
NA	IESPGM.PTET51.1.39.153119	NA	True	True
PTET.51.1.G0390115	IESPGM.PTET51.1.39.180226	Ankyrin repeat-containing domain	False	False
NA	IESPGM.PTET51.1.39.327544	NA	True	True
PTET.51.1.G0390199	IESPGM.PTET51.1.39.370910	Coiled coil domain	False	False
NA	IESPGM.PTET51.1.39.473782	NA	True	True
PTET.51.1.G0390258	IESPGM.PTET51.1.39.489175	Tetratricopeptide repeat	False	False
PTET.51.1.G0390258	IESPGM.PTET51.1.39.489315	Tetratricopeptide repeat	False	False
PTET.51.1.G0390037	IESPGM.PTET51.1.39.68236	NA	False	False
PTET.51.1.G0390054	IESPGM.PTET51.1.39.97398	NAD(P)-binding Rossmann-like domain	False	True
PTET.51.1.G0400101	IESPGM.PTET51.1.40.161126	NA	True	False
PTET.51.1.G0400162	IESPGM.PTET51.1.40.267681	NA	False	False
PTET.51.1.G0400198	IESPGM.PTET51.1.40.319593	NA	False	False
NA	IESPGM.PTET51.1.40.322907	NA	False	False
NA	IESPGM.PTET51.1.40.442620	NA	False	False
PTET.51.1.G0400283	IESPGM.PTET51.1.40.466821	Paramecium surface antigen	False	False
PTET.51.1.G0400059	IESPGM.PTET51.1.40.90381	Glycoside hydrolase, catalytic domain	False	False
PTET.51.1.G0410059	IESPGM.PTET51.1.41.107470	CRC domain	False	False
PTET.51.1.G0410101	IESPGM.PTET51.1.41.185945	WD40/YVTN repeat-like-containing domain	False	False
NA	IESPGM.PTET51.1.41.230544	NA	False	False
NA	IESPGM.PTET51.1.41.335998	NA	False	False
NA	IESPGM.PTET51.1.41.357077	NA	False	True
PTET.51.1.G0410024	IESPGM.PTET51.1.41.55004	Hydantoinase B/oxoprolinase	False	True
NA	IESPGM.PTET51.1.41.67217	NA	True	True
PTET.51.1.G0410035	IESPGM.PTET51.1.41.72891	Deoxyribonuclease II	True	False
NA	IESPGM.PTET51.1.418.2135	NA	False	False
PTET.51.1.G0040118	IESPGM.PTET51.1.4.213541	EF hand associated, type-1	False	False
NA	IESPGM.PTET51.1.42.317214	NA	False	False
PTET.51.1.G0420274	IESPGM.PTET51.1.42.428485	Beta-lactamase/transpeptidase-like	False	True
NA	IESPGM.PTET51.1.42.455405	NA	False	False
NA	IESPGM.PTET51.1.42.74026	NA	False	False
NA	IESPGM.PTET51.1.4.302762	NA	True	True
PTET.51.1.G4310001	IESPGM.PTET51.1.431.2665	WD40-repeat-containing domain	True	False
PTET.51.1.G0040001	IESPGM.PTET51.1.4.3318	NA	False	False
NA	IESPGM.PTET51.1.43.378976	NA	False	True
NA	IESPGM.PTET51.1.43.459816	NA	True	False
PTET.51.1.G0430287	IESPGM.PTET51.1.43.463862	NA	True	False
PTET.51.1.G0040193	IESPGM.PTET51.1.4.361312	Coiled coil domain	False	False
NA	IESPGM.PTET51.1.43.78276	NA	True	True
NA	IESPGM.PTET51.1.4.42356	NA	False	False
NA	IESPGM.PTET51.1.44.340910	NA	True	True
NA	IESPGM.PTET51.1.44.366867	NA	False	False
NA	IESPGM.PTET51.1.44.56078	NA	False	False
NA	IESPGM.PTET51.1.45.10019	NA	False	False
NA	IESPGM.PTET51.1.45.104001	NA	False	False
PTET.51.1.G0450108	IESPGM.PTET51.1.45.156101	NA	True	False
PTET.51.1.G0450138	IESPGM.PTET51.1.45.195596	NA	False	True
NA	IESPGM.PTET51.1.45.197677	NA	True	True
NA	IESPGM.PTET51.1.45.20534	NA	True	True
PTET.51.1.G0450009	IESPGM.PTET51.1.45.20841	GAF domain-like	True	True
PTET.51.1.G4520001	IESPGM.PTET51.1.452.3322	NA	False	True
PTET.51.1.G0450175	IESPGM.PTET51.1.45.249508	Kinesin-like protein	False	False
NA	IESPGM.PTET51.1.45.271243	NA	False	False
PTET.51.1.G0450208	IESPGM.PTET51.1.45.291005	LPS-induced tumor necrosis factor alpha factor	False	False
NA	IESPGM.PTET51.1.45.61393	NA	False	False
PTET.51.1.G0450045	IESPGM.PTET51.1.45.71026	Protein kinase-like domain	False	False
PTET.51.1.G0040003	IESPGM.PTET51.1.4.5905	NA	False	False
NA	IESPGM.PTET51.1.4.608064	NA	False	False
PTET.51.1.G0460262	IESPGM.PTET51.1.46.402070	NA	True	True
PTET.51.1.G0460299	IESPGM.PTET51.1.46.470604	NA	True	False
NA	IESPGM.PTET51.1.46.71521	NA	False	True
NA	IESPGM.PTET51.1.467.929	NA	False	False
PTET.51.1.G0040380	IESPGM.PTET51.1.4.699158	Myxococcus cysteine-rich repeat	False	False
NA	IESPGM.PTET51.1.47.106030	NA	False	False
PTET.51.1.G0470006	IESPGM.PTET51.1.47.13258	Tetratricopeptide repeat-containing domain	False	True
PTET.51.1.G0470006	IESPGM.PTET51.1.47.13910	Tetratricopeptide repeat-containing domain	False	True
PTET.51.1.G0470008	IESPGM.PTET51.1.47.22153	NA	True	True
PTET.51.1.G0470122	IESPGM.PTET51.1.47.233165	NA	False	False
PTET.51.1.G0470139	IESPGM.PTET51.1.47.260977	Coiled coil domain	False	False
PTET.51.1.G0470149	IESPGM.PTET51.1.47.290055	NA	False	True
PTET.51.1.G0470199	IESPGM.PTET51.1.47.382234	Coiled coil domain	False	True
PTET.51.1.G0470204	IESPGM.PTET51.1.47.393797	Coiled coil domain	True	False
NA	IESPGM.PTET51.1.47.443741	NA	False	False
NA	IESPGM.PTET51.1.48.320526	NA	False	False
NA	IESPGM.PTET51.1.48.320817	NA	False	True
NA	IESPGM.PTET51.1.48.396719	NA	True	False
NA	IESPGM.PTET51.1.48.397102	NA	False	False
PTET.51.1.G0480253	IESPGM.PTET51.1.48.443357	NA	False	False
PTET.51.1.G0490117	IESPGM.PTET51.1.49.186363	Protein kinase-like domain	False	True
PTET.51.1.G0500131	IESPGM.PTET51.1.50.205466	NA	False	False
PTET.51.1.G0500018	IESPGM.PTET51.1.50.26347	NA	True	True
PTET.51.1.G0500179	IESPGM.PTET51.1.50.285016	Protein notum homologue	True	True
PTET.51.1.G0500222	IESPGM.PTET51.1.50.352963	Tetratricopeptide repeat	False	False
NA	IESPGM.PTET51.1.50.400291	NA	False	False
NA	IESPGM.PTET51.1.50.4254	NA	False	False
NA	IESPGM.PTET51.1.50.904	NA	False	True
PTET.51.1.G0510070	IESPGM.PTET51.1.51.134167	Coiled coil domain	False	False
PTET.51.1.G0510099	IESPGM.PTET51.1.51.193311	Glycerophosphoryl diester phosphodiesterase	False	False
NA	IESPGM.PTET51.1.51.242394	NA	True	False
NA	IESPGM.PTET51.1.51.284378	NA	False	False
PTET.51.1.G0520219	IESPGM.PTET51.1.52.339837	Tetratricopeptide-like helical domain	False	False
PTET.51.1.G0520220	IESPGM.PTET51.1.52.340682	Tetratricopeptide repeat-containing domain	False	False
PTET.51.1.G0520220	IESPGM.PTET51.1.52.341188	Tetratricopeptide repeat-containing domain	False	True
PTET.51.1.G0530066	IESPGM.PTET51.1.53.114705	Coiled coil domain	False	False
PTET.51.1.G0530005	IESPGM.PTET51.1.53.5181	NA	False	False
NA	IESPGM.PTET51.1.541.1796	NA	False	False
PTET.51.1.G0540099	IESPGM.PTET51.1.54.176039	CoA-transferase family III	False	True
PTET.51.1.G0540169	IESPGM.PTET51.1.54.305636	NA	True	True
PTET.51.1.G0540175	IESPGM.PTET51.1.54.310114	NA	False	False
PTET.51.1.G0540182	IESPGM.PTET51.1.54.318432	Protein kinase domain	False	False
NA	IESPGM.PTET51.1.54.339884	NA	False	False
PTET.51.1.G0050288	IESPGM.PTET51.1.5.464987	NA	False	False
NA	IESPGM.PTET51.1.54.68759	NA	False	False
NA	IESPGM.PTET51.1.5.473547	NA	False	False
PTET.51.1.G0550077	IESPGM.PTET51.1.55.107934	NA	True	True
PTET.51.1.G0550083	IESPGM.PTET51.1.55.115421	NA	False	True
NA	IESPGM.PTET51.1.55.136987	NA	False	True
PTET.51.1.G0550127	IESPGM.PTET51.1.55.206159	Coiled coil domain	False	False
NA	IESPGM.PTET51.1.55.295533	NA	False	False
PTET.51.1.G0550182	IESPGM.PTET51.1.55.303078	Coiled coil domain	False	False
NA	IESPGM.PTET51.1.55.306266	NA	False	False
PTET.51.1.G0550003	IESPGM.PTET51.1.55.6053	A1 cistron-splicing factor, AAR2	False	False
NA	IESPGM.PTET51.1.556.214661	NA	False	False
NA	IESPGM.PTET51.1.556.214866	NA	False	False
NA	IESPGM.PTET51.1.55.66743	NA	False	False
NA	IESPGM.PTET51.1.56.345950	NA	True	True
NA	IESPGM.PTET51.1.5.692994	NA	False	True
PTET.51.1.G0050422	IESPGM.PTET51.1.5.714062	NA	False	False
PTET.51.1.G0570094	IESPGM.PTET51.1.57.185032	Furin-like repeat	False	False
NA	IESPGM.PTET51.1.5.719146	NA	False	True
NA	IESPGM.PTET51.1.57.253093	NA	False	False
NA	IESPGM.PTET51.1.57.271000	NA	False	True
PTET.51.1.G0570158	IESPGM.PTET51.1.57.283839	Alpha/Beta hydrolase fold	True	True
NA	IESPGM.PTET51.1.57.307937	NA	False	False
NA	IESPGM.PTET51.1.57.330675	NA	False	False
PTET.51.1.G0570044	IESPGM.PTET51.1.57.87091	Ubiquitin carboxyl-terminal hydrolase-like domain	False	False
NA	IESPGM.PTET51.1.58.125792	NA	False	False
PTET.51.1.G0580085	IESPGM.PTET51.1.58.160498	NA	True	True
PTET.51.1.G0580141	IESPGM.PTET51.1.58.257417	Tetratricopeptide repeat-containing domain	False	False
PTET.51.1.G0580153	IESPGM.PTET51.1.58.280921	Coiled coil domain	False	False
NA	IESPGM.PTET51.1.58.288468	NA	True	False
PTET.51.1.G0590237	IESPGM.PTET51.1.59.384333	NA	False	False
PTET.51.1.G0590238	IESPGM.PTET51.1.59.385713	Tyrosyl-DNA phosphodiesterase I	True	False
PTET.51.1.G0590256	IESPGM.PTET51.1.59.419984	von Willebrand factor, type A	False	False
PTET.51.1.G0590032	IESPGM.PTET51.1.59.46905	Protein kinase-like domain	False	False
PTET.51.1.G0590062	IESPGM.PTET51.1.59.86883	NA	False	False
PTET.51.1.G0600072	IESPGM.PTET51.1.60.135953	Coiled coil domain	True	True
PTET.51.1.G0600106	IESPGM.PTET51.1.60.197559	Coiled-coil domain-containing protein 180	True	False
NA	IESPGM.PTET51.1.60.253394	NA	False	False
PTET.51.1.G0600136	IESPGM.PTET51.1.60.254104	Tetratricopeptide repeat-containing domain	False	False
PTET.51.1.G0600216	IESPGM.PTET51.1.60.373961	P-loop containing nucleoside triphosphate hydrolase	False	False
PTET.51.1.G0600241	IESPGM.PTET51.1.60.417425	WD40/YVTN repeat-like-containing domain	False	False
NA	IESPGM.PTET51.1.60.421038	NA	False	False
PTET.51.1.G0060080	IESPGM.PTET51.1.6.115286	Coiled coil domain	False	True
PTET.51.1.G0610126	IESPGM.PTET51.1.61.194849	Paramecium surface antigen	False	False
NA	IESPGM.PTET51.1.61.222914	NA	False	True
PTET.51.1.G0610176	IESPGM.PTET51.1.61.287993	Cyclic nucleotide-binding-like	False	False
PTET.51.1.G0610196	IESPGM.PTET51.1.61.319365	Protein kinase domain	False	True
PTET.51.1.G0610260	IESPGM.PTET51.1.61.415371	TLDc domain	False	False
PTET.51.1.G0610057	IESPGM.PTET51.1.61.98799	NA	True	False
PTET.51.1.G0620148	IESPGM.PTET51.1.62.225751	Tctex-1	False	False
PTET.51.1.G0620158	IESPGM.PTET51.1.62.245406	Dbl homology (DH) domain	False	False
NA	IESPGM.PTET51.1.62.298351	NA	False	False
PTET.51.1.G0620209	IESPGM.PTET51.1.62.337439	Protein kinase-like domain	False	True
PTET.51.1.G0620209	IESPGM.PTET51.1.62.337852	Protein kinase-like domain	False	False
NA	IESPGM.PTET51.1.62.373007	NA	False	True
NA	IESPGM.PTET51.1.62.375400	NA	False	False
NA	IESPGM.PTET51.1.63.193272	NA	False	False
PTET.51.1.G0630125	IESPGM.PTET51.1.63.213812	Calcium/calmodulin-dependent/calcium-dependent protein kinase	False	True
NA	IESPGM.PTET51.1.63.225483	NA	False	False
PTET.51.1.G0630199	IESPGM.PTET51.1.63.339263	HAD-like domain	True	False
NA	IESPGM.PTET51.1.63.340584	NA	False	False
PTET.51.1.G0630222	IESPGM.PTET51.1.63.370516	NA	False	False
PTET.51.1.G0630033	IESPGM.PTET51.1.63.46475	Zinc finger, RING/FYVE/PHD-type	False	True
PTET.51.1.G0640100	IESPGM.PTET51.1.64.187340	Protein kinase-like domain	True	False
NA	IESPGM.PTET51.1.6.422162	NA	True	False
PTET.51.1.G0640144	IESPGM.PTET51.1.64.245315	Myxococcus cysteine-rich repeat	False	True
PTET.51.1.G0640176	IESPGM.PTET51.1.64.299151	Protein kinase domain	True	False
PTET.51.1.G0640184	IESPGM.PTET51.1.64.315523	Phosphatidylinositol Kinase	False	False
PTET.51.1.G0640015	IESPGM.PTET51.1.64.36024	Coiled coil domain	False	False
NA	IESPGM.PTET51.1.65.186687	NA	False	False
NA	IESPGM.PTET51.1.65.249935	NA	False	False
NA	IESPGM.PTET51.1.65.287990	NA	False	True
NA	IESPGM.PTET51.1.65.290842	NA	False	True
NA	IESPGM.PTET51.1.65.322765	NA	False	True
PTET.51.1.G0650196	IESPGM.PTET51.1.65.337049	Coiled coil domain	False	False
PTET.51.1.G0650019	IESPGM.PTET51.1.65.41864	Coiled coil domain	False	False
NA	IESPGM.PTET51.1.66.103078	NA	False	True
NA	IESPGM.PTET51.1.662.1142	NA	False	False
NA	IESPGM.PTET51.1.66.57969	NA	True	False
NA	IESPGM.PTET51.1.67.19617	NA	False	True
PTET.51.1.G0670167	IESPGM.PTET51.1.67.279390	XAP5 protein	True	True
PTET.51.1.G0670022	IESPGM.PTET51.1.67.37365	Coiled coil domain	False	False
PTET.51.1.G0670231	IESPGM.PTET51.1.67.376787	Ankyrin repeat-containing domain	False	True
NA	IESPGM.PTET51.1.67.4011	NA	False	False
PTET.51.1.G0060461	IESPGM.PTET51.1.6.749151	NA	True	True
PTET.51.1.G0670032	IESPGM.PTET51.1.67.52717	Periplasmic sensor domain-like	False	False
NA	IESPGM.PTET51.1.67.82163	NA	False	False
NA	IESPGM.PTET51.1.68.259861	NA	False	True
NA	IESPGM.PTET51.1.68.324184	NA	False	False
NA	IESPGM.PTET51.1.68.379640	NA	False	False
NA	IESPGM.PTET51.1.68.66302	NA	False	False
NA	IESPGM.PTET51.1.69.10150	NA	False	True
NA	IESPGM.PTET51.1.69.147933	NA	False	True
NA	IESPGM.PTET51.1.69.307545	NA	False	False
PTET.51.1.G0690203	IESPGM.PTET51.1.69.379537	NA	True	False
NA	IESPGM.PTET51.1.69.381998	NA	True	True
PTET.51.1.G0690029	IESPGM.PTET51.1.69.55136	NA	False	False
NA	IESPGM.PTET51.1.70.154542	NA	False	False
NA	IESPGM.PTET51.1.70.252191	NA	False	False
PTET.51.1.G0700050	IESPGM.PTET51.1.70.70170	Coiled coil domain	False	False
NA	IESPGM.PTET51.1.71.198584	NA	False	False
NA	IESPGM.PTET51.1.71.292334	NA	False	False
PTET.51.1.G0710197	IESPGM.PTET51.1.71.301464	tRNA-guanine(15) transglycosylase-like	False	False
NA	IESPGM.PTET51.1.71.73679	NA	False	False
PTET.51.1.G0710001	IESPGM.PTET51.1.71.8600	Furin-like repeat	False	True
PTET.51.1.G0720087	IESPGM.PTET51.1.72.153687	Coiled coil domain	False	False
NA	IESPGM.PTET51.1.72.235132	NA	False	True
NA	IESPGM.PTET51.1.72.2517	NA	False	False
PTET.51.1.G0720027	IESPGM.PTET51.1.72.50180	NA	False	True
PTET.51.1.G0070170	IESPGM.PTET51.1.7.265511	Nucleophile aminohydrolases, N-terminal	False	False
NA	IESPGM.PTET51.1.7.301612	NA	False	False
PTET.51.1.G0730102	IESPGM.PTET51.1.73.183086	Serine/threonine/dual specificity protein kinase, catalytic domain	False	False
PTET.51.1.G0730109	IESPGM.PTET51.1.73.188704	NA	False	False
NA	IESPGM.PTET51.1.73.264336	NA	False	False
NA	IESPGM.PTET51.1.73.268051	NA	True	True
NA	IESPGM.PTET51.1.73.268377	NA	False	False
NA	IESPGM.PTET51.1.73.526	NA	False	False
PTET.51.1.G0740105	IESPGM.PTET51.1.74.182124	Tetratricopeptide repeat-containing domain	False	False
PTET.51.1.G0740197	IESPGM.PTET51.1.74.340105	NA	False	False
PTET.51.1.G0740204	IESPGM.PTET51.1.74.350153	P-loop containing nucleoside triphosphate hydrolase	True	False
NA	IESPGM.PTET51.1.7.464769	NA	True	False
PTET.51.1.G0070034	IESPGM.PTET51.1.7.50192	Protein kinase-like domain	False	True
PTET.51.1.G0750051	IESPGM.PTET51.1.75.93363	NA	True	True
NA	IESPGM.PTET51.1.76.114576	NA	False	False
PTET.51.1.G0760132	IESPGM.PTET51.1.76.217502	Calcium/calmodulin-dependent/calcium-dependent protein kinase	False	False
PTET.51.1.G0760212	IESPGM.PTET51.1.76.340404	NA	False	False
PTET.51.1.G0760023	IESPGM.PTET51.1.76.51048	H-type lectin domain	True	False
NA	IESPGM.PTET51.1.7.654352	NA	False	False
PTET.51.1.G0760030	IESPGM.PTET51.1.76.61460	Hly-III-related	False	True
PTET.51.1.G0070430	IESPGM.PTET51.1.7.674274	Lysosomal cystine transporter	True	False
PTET.51.1.G0770009	IESPGM.PTET51.1.77.16494	Protein kinase-like domain	False	False
PTET.51.1.G0770020	IESPGM.PTET51.1.77.35999	NA	False	True
PTET.51.1.G0780082	IESPGM.PTET51.1.78.137742	NA	True	True
NA	IESPGM.PTET51.1.78.158268	NA	False	False
PTET.51.1.G0780203	IESPGM.PTET51.1.78.349919	Insulin-like growth factor binding protein, N-terminal	True	False
PTET.51.1.G0780032	IESPGM.PTET51.1.78.47613	NA	True	True
PTET.51.1.G0780051	IESPGM.PTET51.1.78.75611	WD40-repeat-containing domain	False	False
PTET.51.1.G0790081	IESPGM.PTET51.1.79.127871	Coiled coil domain	False	False
PTET.51.1.G0790118	IESPGM.PTET51.1.79.180330	SMAD/FHA domain	False	False
NA	IESPGM.PTET51.1.79.22220	NA	False	False
PTET.51.1.G0790191	IESPGM.PTET51.1.79.285764	NA	True	True
NA	IESPGM.PTET51.1.80.14857	NA	False	False
NA	IESPGM.PTET51.1.80.316647	NA	False	False
NA	IESPGM.PTET51.1.80.333704	NA	False	False
PTET.51.1.G0080110	IESPGM.PTET51.1.8.169499	Tetratricopeptide repeat-containing domain	False	False
NA	IESPGM.PTET51.1.82.142615	NA	False	True
NA	IESPGM.PTET51.1.8.219938	NA	False	False
NA	IESPGM.PTET51.1.8.278536	NA	True	True
NA	IESPGM.PTET51.1.83.1087	NA	False	False
NA	IESPGM.PTET51.1.83.159255	NA	True	True
NA	IESPGM.PTET51.1.83.215061	NA	False	True
NA	IESPGM.PTET51.1.83.269522	NA	False	False
PTET.51.1.G0830153	IESPGM.PTET51.1.83.292828	Tetraspanin/Peripherin	False	False
PTET.51.1.G0840109	IESPGM.PTET51.1.84.188827	Pumilio RNA-binding repeat	True	False
PTET.51.1.G0840115	IESPGM.PTET51.1.84.200568	NA	False	True
PTET.51.1.G0840162	IESPGM.PTET51.1.84.279975	Quinonprotein alcohol dehydrogenase-like superfamily	True	False
PTET.51.1.G0080029	IESPGM.PTET51.1.8.42812	Small nuclear RNA activating complex (SNAPc), subunit SNAP43	False	False
PTET.51.1.G0850093	IESPGM.PTET51.1.85.142962	Coiled coil domain	False	True
NA	IESPGM.PTET51.1.85.151526	NA	False	False
NA	IESPGM.PTET51.1.85.153086	NA	True	True
PTET.51.1.G0850035	IESPGM.PTET51.1.85.51765	Cys/Met metabolism, pyridoxal phosphate-dependent enzyme	False	False
PTET.51.1.G0080038	IESPGM.PTET51.1.8.56847	Coiled coil domain	False	False
NA	IESPGM.PTET51.1.86.100828	NA	False	False
NA	IESPGM.PTET51.1.86.123638	NA	False	False
PTET.51.1.G0860095	IESPGM.PTET51.1.86.147925	NA	False	False
NA	IESPGM.PTET51.1.8.615964	NA	False	False
PTET.51.1.G0860138	IESPGM.PTET51.1.86.198378	Tetratricopeptide-like helical domain	False	True
PTET.51.1.G0860139	IESPGM.PTET51.1.86.201144	Furin-like repeat	False	False
PTET.51.1.G0860140	IESPGM.PTET51.1.86.204535	NA	False	False
PTET.51.1.G0080006	IESPGM.PTET51.1.8.6277	NA	False	False
PTET.51.1.G0860021	IESPGM.PTET51.1.86.34438	Protein kinase-like domain	False	False
PTET.51.1.G0860004	IESPGM.PTET51.1.86.3539	NA	False	False
NA	IESPGM.PTET51.1.86.54802	NA	False	False
NA	IESPGM.PTET51.1.86.59424	NA	False	False
PTET.51.1.G0870057	IESPGM.PTET51.1.87.107842	Molybdopterin oxidoreductase	True	False
NA	IESPGM.PTET51.1.88.110543	NA	False	False
NA	IESPGM.PTET51.1.88.229840	NA	False	True
PTET.51.1.G0880181	IESPGM.PTET51.1.88.319508	Phox homologous domain	False	False
PTET.51.1.G0880002	IESPGM.PTET51.1.88.4925	NA	False	False
NA	IESPGM.PTET51.1.89.110924	NA	False	False
PTET.51.1.G0890143	IESPGM.PTET51.1.89.229230	Protein of unknown function DUF2816	False	False
NA	IESPGM.PTET51.1.89.35117	NA	False	True
PTET.51.1.G0080008	IESPGM.PTET51.1.8.9472	NA	False	True
NA	IESPGM.PTET51.1.90.142573	NA	False	False
NA	IESPGM.PTET51.1.91.163995	NA	True	True
PTET.51.1.G0910107	IESPGM.PTET51.1.91.196430	NA	False	False
PTET.51.1.G0910130	IESPGM.PTET51.1.91.226164	NA	False	False
NA	IESPGM.PTET51.1.91.227966	NA	False	False
PTET.51.1.G0910159	IESPGM.PTET51.1.91.294919	Mitochondrial carrier domain	False	False
NA	IESPGM.PTET51.1.91.317	NA	True	True
PTET.51.1.G0910175	IESPGM.PTET51.1.91.335489	NA	False	True
NA	IESPGM.PTET51.1.9.212296	NA	False	False
NA	IESPGM.PTET51.1.92.138543	NA	False	False
PTET.51.1.G0920087	IESPGM.PTET51.1.92.154172	Pyridine nucleotide-disulphide oxidoreductase, FAD/NAD(P)-binding domain	False	False
PTET.51.1.G0920102	IESPGM.PTET51.1.92.175927	NAD(P)-binding domain	True	True
PTET.51.1.G0920114	IESPGM.PTET51.1.92.192616	Methyltransferase OMS1-like	False	False
PTET.51.1.G0920114	IESPGM.PTET51.1.92.192771	Methyltransferase OMS1-like	True	False
PTET.51.1.G0090141	IESPGM.PTET51.1.9.267950	LPS-induced tumor necrosis factor alpha factor	False	True
PTET.51.1.G0920001	IESPGM.PTET51.1.92.7200	NA	True	True
PTET.51.1.G0920002	IESPGM.PTET51.1.92.7393	NA	False	False
NA	IESPGM.PTET51.1.9.288638	NA	False	True
NA	IESPGM.PTET51.1.9.291927	NA	True	True
NA	IESPGM.PTET51.1.9.307228	NA	True	False
NA	IESPGM.PTET51.1.93.244855	NA	False	False
PTET.51.1.G0930001	IESPGM.PTET51.1.93.2464	Coiled coil domain	False	True
PTET.51.1.G0930170	IESPGM.PTET51.1.93.264641	Homeodomain-like	False	False
PTET.51.1.G0930186	IESPGM.PTET51.1.93.296073	Coiled coil domain	False	False
NA	IESPGM.PTET51.1.93.314934	NA	False	False
PTET.51.1.G0090192	IESPGM.PTET51.1.9.348865	Coiled coil domain	False	False
NA	IESPGM.PTET51.1.93.816	NA	False	False
PTET.51.1.G0940084	IESPGM.PTET51.1.94.132669	NA	False	False
PTET.51.1.G0940119	IESPGM.PTET51.1.94.185115	Ribonuclease III domain	False	False
NA	IESPGM.PTET51.1.94.266340	NA	False	True
PTET.51.1.G0940017	IESPGM.PTET51.1.94.27607	Coiled coil domain	False	False
PTET.51.1.G0940017	IESPGM.PTET51.1.94.29638	Coiled coil domain	False	False
NA	IESPGM.PTET51.1.94.34760	NA	False	False
NA	IESPGM.PTET51.1.9.510368	NA	True	False
PTET.51.1.G0090289	IESPGM.PTET51.1.9.510870	NA	False	False
PTET.51.1.G0950189	IESPGM.PTET51.1.95.325779	WD40-repeat-containing domain	False	False
PTET.51.1.G0950030	IESPGM.PTET51.1.95.49191	Protein kinase-like domain	True	False
PTET.51.1.G0960009	IESPGM.PTET51.1.96.13739	Ryanodine receptor-related	False	False
NA	IESPGM.PTET51.1.9.613911	NA	False	False
NA	IESPGM.PTET51.1.96.152386	NA	False	False
PTET.51.1.G0090367	IESPGM.PTET51.1.9.619144	NA	False	False
PTET.51.1.G0960188	IESPGM.PTET51.1.96.310959	C2 domain	False	False
PTET.51.1.G0960193	IESPGM.PTET51.1.96.326535	Furin-like repeat	False	False
NA	IESPGM.PTET51.1.97.1213	NA	False	False
PTET.51.1.G0970093	IESPGM.PTET51.1.97.131908	HTH CenpB-type DNA-binding domain	False	False
NA	IESPGM.PTET51.1.97.133211	NA	False	True
NA	IESPGM.PTET51.1.97.133283	NA	False	False
PTET.51.1.G0970128	IESPGM.PTET51.1.97.189949	NA	False	True
PTET.51.1.G0970187	IESPGM.PTET51.1.97.313663	Pianissimo family	False	False
NA	IESPGM.PTET51.1.98.224565	NA	False	False
PTET.51.1.G0980149	IESPGM.PTET51.1.98.226198	NA	False	True
PTET.51.1.G0990094	IESPGM.PTET51.1.99.145984	E3 SUMO protein ligase	True	True
PTET.51.1.G0990095	IESPGM.PTET51.1.99.147646	Choline transporter-like	False	True
NA	IESPGM.PTET51.1.99.196870	NA	False	True
NA	IESPGM.PTET51.1.99.71526	NA	False	False

## Sheet: Legend S3
Supplemental Table S3. Set of IESs, that are shared between all four experimental lines (4-way shared set: IRS >0 in 25F0, 25F1, 18F1 and 32F1). This table represents a specific subset of interest that is fully included in Supplemental Table S2 and in the legend of which all columns are described.
