# Supplementary material for: Environmentally induced plasticity of programmed DNA elimination boosts somatic variability in Paramecium tetraurelia
Source: HighWire-hosted journal article supplement (doi:10.1101/gr.245332.118), 2019-09-23
Supplement: Supplemental_Figures_and_Tables.zip [file Supplemental_Table_S4.xlsx]

## Sheet: Table S4
IRS_GREATER_THAN	GENES_WITH_WGD1_OHNOLOG_OBSERVED_18F1	GENES_WITH_WGD1_OHNOLOG_EXPECTED_18F1	P_VALUE_UPPER_18F1	P_VALUE_LOWER_18F1	GENES_WITH_WGD1_OHNOLOG_OBSERVED_25F1	GENES_WITH_WGD1_OHNOLOG_EXPECTED_25F1	P_VALUE_UPPER_25F1	P_VALUE_LOWER_25F1	GENES_WITH_WGD1_OHNOLOG_OBSERVED_32F1	GENES_WITH_WGD1_OHNOLOG_EXPECTED_32F1	P_VALUE_UPPER_32F1	P_VALUE_LOWER_32F1
0	4067	4297	1	5.56534e-13	3512	3689	1	5.80621e-09	4332	4585	1	5.31142e-15
0.1	86	186	1	5.87502e-33	50	83	1	1.67093e-09	139	230	1	9.53355e-23
0.2	37	92	1	6.62107e-21	25	49	1	1.00731e-08	61	114	1	3.72804e-16
0.3	23	63	1	6.25293e-17	21	43	1	2.30541e-08	34	77	1	8.54696e-16
0.4	20	51	1	6.94625e-13	17	37	1	2.50111e-08	27	62	1	4.01671e-13
0.5	14	39	1	4.12624e-11	13	32	1	2.20887e-08	17	43	1	2.32742e-11
0.6	12	30	1	1.7025e-08	11	28	1	5.53658e-08	11	30	1	2.85063e-09
0.7	10	27	1	4.10295e-08	7	22	1	6.11682e-08	8	24	1	1.96295e-08
0.8	8	21	0.999999	9.12579e-07	5	16	0.999999	1.29557e-06	7	19	0.999997	2.97445e-06
0.9	5	14	0.999986	1.44213e-05	4	12	0.999954	4.61411e-05	4	11	0.999897	0.000103403

## Sheet: Legend S4
Supplemental Table S4. Genes affected by IES retention show a deficit of ohnologs from the most recent whole genome duplication.
