# Supplementary material for: Environmentally induced plasticity of programmed DNA elimination boosts somatic variability in Paramecium tetraurelia
Source: HighWire-hosted journal article supplement (doi:10.1101/gr.245332.118), 2019-09-23
Supplement: Supplemental_Figures_and_Tables.zip [file Supplemental_Table_S5.xlsx]

## Sheet: Table S5
GENE_ID	IES_ID	IRS_25F0	IRS_25F1	WGD1_IES_ID	WGD1_GENE	IRS_RNA_25_R1_D12	IES_PLUS_RNA_25_R1_D12	IES_MINUS_RNA_25_R1_D12	IRS_RNA_25_R2_D12	IES_PLUS_RNA_25_R2_D12	IES_MINUS_RNA_25_R2_D12	TPM_AVG_25	WGD1_IRS_25F0	WGD1_IRS_25F1	WGD1_TPM_AVG_25	WGD1_IRS_RNA_25_R1_D12	WGD1_IES_PLUS_RNA_25_R1_D12	WGD1_IES_MINUS_RNA_25_R1_D12	WGD1_IRS_RNA_25_R2_D12	WGD1_IES_PLUS_RNA_25_R2_D12	WGD1_IES_MINUS_RNA_25_R2_D12
PTET.51.1.G1000106	IESPGM.PTET51.1.100.194859	0.01	0.0139	IESPGM.PTET51.1.132.103319	PTET.51.1.G1320055	0	0	0	0	0	0	0.21	0	0	0.315	0	0	0	0	0	0
PTET.51.1.G1000141	IESPGM.PTET51.1.100.259947	0.011	0.0133	IESPGM.PTET51.1.132.47682	PTET.51.1.G1320022	0	0	257	0	0	256	13.02	0	0	2.36	0	0	31	0	0	26
PTET.51.1.G1010096	IESPGM.PTET51.1.101.150662	0.0103	0.0102	IESPGM.PTET51.1.46.134340	PTET.51.1.G0460089	0	0	57	0	0	52	7.375	0	0	2.905	0	0	26	0	0	26
PTET.51.1.G1010119	IESPGM.PTET51.1.101.189441	0.0217	0.0286	IESPGM.PTET51.1.46.174232	PTET.51.1.G0460112	0	0	9	0	0	5	0.82	0	0	3.44	0	0	48	0	0	30
PTET.51.1.G1010154	IESPGM.PTET51.1.101.237753	0.0135	0.0385	IESPGM.PTET51.1.46.242351	PTET.51.1.G0460169	0	0	5	0	0	3	4.165	0	0	2.49	0	0	71	0	0	66
PTET.51.1.G1010183	IESPGM.PTET51.1.101.279756	0.0568	0.0217	IESPGM.PTET51.1.46.307352	PTET.51.1.G0460208	0	0	5	0	0	7	0.61	0	0	0.135	0	0	0	0	0	1
PTET.51.1.G0100077	IESPGM.PTET51.1.10.149066	0.013	0.0189	IESPGM.PTET51.1.59.1232	PTET.51.1.G0590001	0	0	4	0	0	1	0.525	0	0.0196	0.19	0	0	2	0	0	0
PTET.51.1.G1020073	IESPGM.PTET51.1.102.103636	0.0104	0.0111	IESPGM.PTET51.1.40.118996	PTET.51.1.G0400078	0	0	81	0	0	216	14.24	0	0	8.585	0	0	82	0	0	118
PTET.51.1.G1020159	IESPGM.PTET51.1.102.237601	0.0106	0.0109	IESPGM.PTET51.1.40.283016	PTET.51.1.G0400173	0	0	49	0	0	32	4.505	0	0	2.8	0	0	25	0	0	6
PTET.51.1.G0100133	IESPGM.PTET51.1.10.225117	0.025	0.0116	IESPGM.PTET51.1.59.90494	PTET.51.1.G0590065	0	0	4	0	0	2	0.14	0	0	0.58	0	0	0	0	0	5
PTET.51.1.G0100145	IESPGM.PTET51.1.10.240455	0.0263	0.0106	IESPGM.PTET51.1.59.106296	PTET.51.1.G0590075	0	0	21	0	0	12	1.235	0	0	0.88	0	0	8	0	0	9
PTET.51.1.G0100154	IESPGM.PTET51.1.10.254894	0.0127	0.0116	IESPGM.PTET51.1.59.122763	PTET.51.1.G0590086	0	0	21	0	0	19	2.14	0	0	1.365	0	0	19	0	0	9
PTET.51.1.G1030066	IESPGM.PTET51.1.103.105980	0.0114	0.0213	IESPGM.PTET51.1.148.86094	PTET.51.1.G1480058	0	0	13	0	0	13	0.72	0	0	2.125	0	0	23	0	0	20
PTET.51.1.G1030106	IESPGM.PTET51.1.103.182260	0.0105	0.025	IESPGM.PTET51.1.148.144182	PTET.51.1.G1480102	0	0	7	0	0	2	0.51	0	0	0.18	0	0	2	0	0	0
PTET.51.1.G1030106	IESPGM.PTET51.1.103.182406	0.0108	0.0122	IESPGM.PTET51.1.148.144328	PTET.51.1.G1480102	0	0	6	0	0	9	0.51	0	0	0.18	0	0	2	0	0	4
PTET.51.1.G1030108	IESPGM.PTET51.1.103.184424	0.0341	0.0118	IESPGM.PTET51.1.148.145135	PTET.51.1.G1480103	0	0	56	0	0	54	5.22	0	0.012	6.05	0	0	54	0	0	52
PTET.51.1.G1030142	IESPGM.PTET51.1.103.240181	0.0185	0.0444	IESPGM.PTET51.1.148.186719	PTET.51.1.G1480132	0	0	11	0	0	10	0.51	0	0.0192	2.745	0	0	36	0	0	27
PTET.51.1.G1030018	IESPGM.PTET51.1.103.30131	0.0361	0.0333	IESPGM.PTET51.1.148.14611	PTET.51.1.G1480008	0	0	14	0	0	14	1.21	0	0.037	0.65	0	0	8	0	0	6
PTET.51.1.G0100215	IESPGM.PTET51.1.10.350037	0.0149	0.0159	IESPGM.PTET51.1.59.235201	PTET.51.1.G0590148	0	0	1006	0	0	1155	135.29	0	0	0.28	0	0	9	0	0	6
PTET.51.1.G1030045	IESPGM.PTET51.1.103.66349	0.0182	0.0167	IESPGM.PTET51.1.148.54246	PTET.51.1.G1480038	0	0	9	0	0	3	0.335	0	0.0185	2.015	0	0	19	0	0	9
PTET.51.1.G1040079	IESPGM.PTET51.1.104.148844	0.0222	0.012	IESPGM.PTET51.1.131.103080	PTET.51.1.G1310063	0	0	0	0	0	0	0.015	0	0	0.61	0	0	3	0	0	4
PTET.51.1.G1040099	IESPGM.PTET51.1.104.184080	0.0135	0.0108	IESPGM.PTET51.1.131.141501	PTET.51.1.G1310080	0	0	31	0	0	32	7.055	0	0	2.39	0	0	8	0	0	11
PTET.51.1.G1040138	IESPGM.PTET51.1.104.245002	0.012	0.0137	IESPGM.PTET51.1.131.209710	PTET.51.1.G1310115	0	0	100	0	0	132	32.285	0	0	0.895	0	0	4	0	0	1
PTET.51.1.G1040143	IESPGM.PTET51.1.104.252053	0.011	0.0244	IESPGM.PTET51.1.131.215564	PTET.51.1.G1310118	0	0	8	0	0	4	0.595	0	0	0.585	0	0	6	0	0	5
PTET.51.1.G1040041	IESPGM.PTET51.1.104.82257	0.0227	0.0133	IESPGM.PTET51.1.131.56293	PTET.51.1.G1310035	0	0	4	0	0	2	0.22	0	0	0.505	0	0	9	0	0	1
PTET.51.1.G1050084	IESPGM.PTET51.1.105.128719	0.0506	0.0727	IESPGM.PTET51.1.121.134009	PTET.51.1.G1210087	0	0	5	0	0	7	0.465	0	0	0.76	0	0	8	0	0	9
PTET.51.1.G1050131	IESPGM.PTET51.1.105.206617	0.0143	0.0238	IESPGM.PTET51.1.121.212227	PTET.51.1.G1210130	0	0	175	0	0	62	16.365	0	0	1.85	0	0	17	0	0	8
PTET.51.1.G1050027	IESPGM.PTET51.1.105.40690	0.0513	0.0225	IESPGM.PTET51.1.121.51202	PTET.51.1.G1210030	0	0	125	0	0	113	13.34	0	0	11.09	0	0	77	0	0	49
PTET.51.1.G1050036	IESPGM.PTET51.1.105.56104	0.0115	0.0147	IESPGM.PTET51.1.121.64734	PTET.51.1.G1210039	0	0	150	0	0	138	10.19	0	0	3.435	0	0	31	0	0	31
PTET.51.1.G1060133	IESPGM.PTET51.1.106.197423	0.0128	0.0156	IESPGM.PTET51.1.96.88191	PTET.51.1.G0960051	0	0	33	0	0	37	2.775	0	0	1.68	0	0	18	0	0	12
PTET.51.1.G1070077	IESPGM.PTET51.1.107.131107	0.0196	0.0147	IESPGM.PTET51.1.155.127195	PTET.51.1.G1550074	0	0	2	0	0	2	0.155	0	0	0.45	0	0	1	0	0	5
PTET.51.1.G1070112	IESPGM.PTET51.1.107.194357	0.0139	0.0278	IESPGM.PTET51.1.155.80886	PTET.51.1.G1550045	0	0	10	0	0	1	0.955	0	0.0282	0.755	0	0	7	0	0	2
PTET.51.1.G0100032	IESPGM.PTET51.1.10.73128	0.0211	0.0141	IESPGM.PTET51.1.154.89407	PTET.51.1.G1540053	0	0	140	0	0	131	7.325	0	0	7.93	0	0	149	0	0	122
PTET.51.1.G1070031	IESPGM.PTET51.1.107.51876	0.0167	0.0154	IESPGM.PTET51.1.155.189714	PTET.51.1.G1550120	0	0	34	0	0	28	7.95	0	0	4.155	0	0	16	0	0	6
PTET.51.1.G1070057	IESPGM.PTET51.1.107.95638	0.0145	0.0217	IESPGM.PTET51.1.155.163799	PTET.51.1.G1550101	0	0	2	0	0	2	0.155	0	0	1.2	0	0	2	0	0	6
PTET.51.1.G1080075	IESPGM.PTET51.1.108.109883	0.011	0.0139	IESPGM.PTET51.1.55.267825	PTET.51.1.G0550162	0	0	21	0	0	14	2.31	0	0	2.415	0	0	26	0	0	13
PTET.51.1.G1080065	IESPGM.PTET51.1.108.95232	0.0127	0.0118	IESPGM.PTET51.1.55.257236	PTET.51.1.G0550156	0	0	0	0	0	4	0.37	0	0	0.04	0	0	0	0	0	0
PTET.51.1.G0100038	IESPGM.PTET51.1.10.89864	0.0123	0.0156	IESPGM.PTET51.1.154.70268	PTET.51.1.G1540046	0	0	14	0	0	17	1.38	0	0	1.64	0	0	13	0	0	17
PTET.51.1.G1090092	IESPGM.PTET51.1.109.169388	0.0125	0.0208	IESPGM.PTET51.1.120.142627	PTET.51.1.G1200083	0	0	9	0	0	6	0.71	0	0	0.47	0	0	9	0	0	3
PTET.51.1.G1100151	IESPGM.PTET51.1.110.252268	0.0211	0.0137	IESPGM.PTET51.1.153.33335	PTET.51.1.G1530017	0	0	2	0	0	1	0.73	0	0	0.435	0	0	5	0	0	0
PTET.51.1.G1100152	IESPGM.PTET51.1.110.253350	0.0476	0.0154	IESPGM.PTET51.1.153.32251	PTET.51.1.G1530016	0	0	36	0	0	29	2.225	0	0	3.465	0	0	33	0	0	59
PTET.51.1.G1100060	IESPGM.PTET51.1.110.95785	0.0112	0.0238	IESPGM.PTET51.1.85.96306	PTET.51.1.G0850063	0	0	24	0	0	39	3.12	0	0	4.045	0	0	53	0	0	63
PTET.51.1.G1110050	IESPGM.PTET51.1.111.103086	0.0112	0.0143	IESPGM.PTET51.1.85.171873	PTET.51.1.G0850112	0	0	0	0	0	0	0.07	0	0	0.095	0	0	0	0	0	0
PTET.51.1.G1110089	IESPGM.PTET51.1.111.164264	0.0217	0.04	IESPGM.PTET51.1.85.214444	PTET.51.1.G0850137	0	0	10	0.5	2	2	0.58	0	0	0.595	0	0	3	0	0	6
PTET.51.1.G1110163	IESPGM.PTET51.1.111.278912	0.0263	0.0286	IESPGM.PTET51.1.85.326703	PTET.51.1.G0850202	0	0	1	0	0	5	0.31	0	0	0.755	0	0	1	0	0	0
PTET.51.1.G0110134	IESPGM.PTET51.1.11.194633	0.0115	0.0105	IESPGM.PTET51.1.7.211997	PTET.51.1.G0070142	0	0	12	0	0	12	2.34	0	0	1.15	0	0	15	0	0	2
PTET.51.1.G1120068	IESPGM.PTET51.1.112.117482	0.0112	0.0091	IESPGM.PTET51.1.75.172642	PTET.51.1.G0750099	0	0	171	0	0	161	11.725	0	0	30.415	0	0	387	0	0	365
PTET.51.1.G1120138	IESPGM.PTET51.1.112.233058	0.011	0.0116	IESPGM.PTET51.1.75.294103	PTET.51.1.G0750173	0	0	7	0	0	6	0.6	0	0	0.99	0	0	10	0	0	16
PTET.51.1.G1120172	IESPGM.PTET51.1.112.281220	0.0106	0.0345	IESPGM.PTET51.1.75.336323	PTET.51.1.G0750199	0	0	20	0	0	17	2.655	0	0	1.625	0	0	7	0	0	6
PTET.51.1.G1120026	IESPGM.PTET51.1.112.45962	0.0132	0.0746	IESPGM.PTET51.1.75.116365	PTET.51.1.G0750063	0	0	23	0	0	5	1.36	0	0	0.695	0	0	13	0	0	9
PTET.51.1.G0110166	IESPGM.PTET51.1.11.250450	0.0222	0.0115	IESPGM.PTET51.1.7.270085	PTET.51.1.G0070174	0	0	64	0	0	51	6.37	0	0.0101	8.195	0	0	113	0	0	98
PTET.51.1.G1120004	IESPGM.PTET51.1.112.9759	0.0133	0.012	IESPGM.PTET51.1.75.83441	PTET.51.1.G0750047	0	0	32	0	0	41	3.11	0	0	11.97	0	0	112	0	0	108
PTET.51.1.G0110205	IESPGM.PTET51.1.11.323073	0.033	0.0137	IESPGM.PTET51.1.7.335067	PTET.51.1.G0070215	0	0	13	0	0	15	1.38	0	0	0.535	0	0	1	0	0	2
PTET.51.1.G0110206	IESPGM.PTET51.1.11.327803	0.0127	0.0256	IESPGM.PTET51.1.7.342672	PTET.51.1.G0070219	0	0	8	0	0	8	1.135	0	0	0.365	0	0	2	0	0	5
PTET.51.1.G1130023	IESPGM.PTET51.1.113.49614	0.0099	0.0083	IESPGM.PTET51.1.115.252676	PTET.51.1.G1150146	0	0	2	0	0	15	0.73	0	0.0123	40.37	0	0	1127	0	0	731
PTET.51.1.G1130025	IESPGM.PTET51.1.113.56355	0.0128	0.0116	IESPGM.PTET51.1.115.245320	PTET.51.1.G1150143	0	0	1	0	0	0	0.465	0	0	0.465	0	0	2	0	0	2
PTET.51.1.G1130025	IESPGM.PTET51.1.113.56429	0.0135	0.0118	IESPGM.PTET51.1.115.245246	PTET.51.1.G1150143	0	0	4	0	0	1	0.465	0	0	0.465	0	0	1	0	0	5
PTET.51.1.G1140105	IESPGM.PTET51.1.114.182205	0.0135	0.0105	IESPGM.PTET51.1.122.167003	PTET.51.1.G1220090	0	0	21	0	0	29	3.025	0	0	3.23	0	0	22	0	0	23
PTET.51.1.G1140044	IESPGM.PTET51.1.114.65334	0.011	0.0122	IESPGM.PTET51.1.122.55550	PTET.51.1.G1220033	0	0	0	0	0	0	0.05	0	0	6.16	0	0	186	0	0	137
PTET.51.1.G1150097	IESPGM.PTET51.1.115.162363	0.0103	0.0167	IESPGM.PTET51.1.113.134146	PTET.51.1.G1130073	0	0	5	0	0	11	1.625	0	0	3.585	0	0	22	0	0	18
PTET.51.1.G1150161	IESPGM.PTET51.1.115.276415	0.0108	0.0575	IESPGM.PTET51.1.113.33725	PTET.51.1.G1130014	0	0	10	0	0	16	1.49	0	0	0.56	0	0	8	0	0	6
PTET.51.1.G1150165	IESPGM.PTET51.1.115.285034	0.0143	0.0172	IESPGM.PTET51.1.113.28527	PTET.51.1.G1130011	0	0	28	0	0	30	1.315	0	0	0.67	0	0	18	0	0	5
PTET.51.1.G0110335	IESPGM.PTET51.1.11.533060	0.0116	0.0109	IESPGM.PTET51.1.7.564228	PTET.51.1.G0070350	0	0	259	0	0	146	21.605	0	0	25.15	0	0	210	0	0	178
PTET.51.1.G1150040	IESPGM.PTET51.1.115.70373	0.0123	0.01	IESPGM.PTET51.1.113.225273	PTET.51.1.G1130129	0	0	65	0	0	73	8.46	0	0	47.41	0	0	449	0	0	466
PTET.51.1.G1160058	IESPGM.PTET51.1.116.98569	0.0278	0.0532	IESPGM.PTET51.1.133.161795	PTET.51.1.G1330100	0	0	176	0	0	169	102.115	0	0	142.865	0	0	309	0	0	227
PTET.51.1.G1170072	IESPGM.PTET51.1.117.128243	0.013	0.0244	IESPGM.PTET51.1.84.175128	PTET.51.1.G0840099	0	0	10	0	0	9	1.715	0	0	1.305	0	0	10	0	0	9
PTET.51.1.G1170149	IESPGM.PTET51.1.117.251820	0.0112	0.0152	IESPGM.PTET51.1.84.306468	PTET.51.1.G0840174	0	0	5	0	0	3	0.415	0	0	0.045	0	0	0	0	0	0
PTET.51.1.G1170011	IESPGM.PTET51.1.117.25424	0.0143	0.037	IESPGM.PTET51.1.84.42753	PTET.51.1.G0840027	0	0	4	0	0	5	0.2	0	0	6.025	0	0	48	0	0	38
PTET.51.1.G1180012	IESPGM.PTET51.1.118.21132	0.48	0.7692	IESPGM.PTET51.1.93.299358	PTET.51.1.G0930188	1	2	0	0	0	0	0.095	0	0	7.5	0	0	43	0	0	40
PTET.51.1.G1190106	IESPGM.PTET51.1.119.159152	0.027	0.2471	IESPGM.PTET51.1.89.213632	PTET.51.1.G0890133	0	0	9	0.3333	2	4	0.96	0	0	1.325	0	0	13	0	0	7
PTET.51.1.G1190147	IESPGM.PTET51.1.119.226019	0.0118	0.0147	IESPGM.PTET51.1.89.278949	PTET.51.1.G0890170	0	0	0	0	0	0	0.015	0	0	0.1	0	0	0	0	0	2
PTET.51.1.G1200024	IESPGM.PTET51.1.120.48106	0.02	0.0256	IESPGM.PTET51.1.109.82685	PTET.51.1.G1090049	0	0	50	0	0	25	11.615	0	0	6.47	0	0	29	0	0	45
PTET.51.1.G1200032	IESPGM.PTET51.1.120.57363	0.0132	0.0256	IESPGM.PTET51.1.109.88502	PTET.51.1.G1090053	0	0	7	0	0	15	0.41	0	0	0.285	0	0	2	0	0	3
PTET.51.1.G1200054	IESPGM.PTET51.1.120.92695	0.0103	0.023	IESPGM.PTET51.1.109.120468	PTET.51.1.G1090070	0	0	33	0	0	29	3.225	0	0	1.735	0	0	23	0	0	17
PTET.51.1.G0120064	IESPGM.PTET51.1.12.107204	0.0123	0.0103	IESPGM.PTET51.1.97.147589	PTET.51.1.G0970100	0	0	116	0	0	65	7.825	0	0	6.005	0	0	58	0	0	42
PTET.51.1.G0120069	IESPGM.PTET51.1.12.120174	0.0106	0.0108	IESPGM.PTET51.1.97.134298	PTET.51.1.G0970095	0	0	96	0	0	114	6.805	0	0	16.75	0	0	159	0	0	150
PTET.51.1.G1210046	IESPGM.PTET51.1.121.74543	0.0455	0.0159	IESPGM.PTET51.1.105.65226	PTET.51.1.G1050042	0	0	6	0	0	6	0.6	0	0	1.035	0	0	5	0	0	15
PTET.51.1.G1210048	IESPGM.PTET51.1.121.77408	0.0303	0.0137	IESPGM.PTET51.1.105.68099	PTET.51.1.G1050044	0	0	3	0	0	4	0.18	0	0	1.79	0	0	12	0	0	14
PTET.51.1.G1220071	IESPGM.PTET51.1.122.136487	0.0513	0.0263	IESPGM.PTET51.1.114.140120	PTET.51.1.G1140083	0	0	1	0	0	0	1.12	0	0	2.09	0	0	0	0	0	0
PTET.51.1.G1220080	IESPGM.PTET51.1.122.150245	0.0143	0.0115	IESPGM.PTET51.1.114.165724	PTET.51.1.G1140097	0	0	4	0	0	0	0.09	0	0	0.215	0	0	2	0	0	2
PTET.51.1.G1220010	IESPGM.PTET51.1.122.19948	0.026	0.0116	IESPGM.PTET51.1.114.27957	PTET.51.1.G1140021	0	0	6	0	0	4	0.51	0	0	0.205	0	0	2	0	0	0
PTET.51.1.G0120003	IESPGM.PTET51.1.12.2496	0.0351	0.0137	IESPGM.PTET51.1.97.279280	PTET.51.1.G0970172	0	0	2	0	0	4	0.49	0	0	3.715	0	0	23	0	0	4
PTET.51.1.G0120154	IESPGM.PTET51.1.12.257043	0.0233	0.026	IESPGM.PTET51.1.23.549238	PTET.51.1.G0230322	0	0	0	0	0	1	0.01	0	0	1.39	0	0	14	0	0	17
PTET.51.1.G1220043	IESPGM.PTET51.1.122.86424	0.0164	0.0123	IESPGM.PTET51.1.114.83185	PTET.51.1.G1140053	0	0	1	0	0	1	0.09	0	0	0.91	0	0	4	0	0	7
PTET.51.1.G1220047	IESPGM.PTET51.1.122.96486	0.0159	0.0141	IESPGM.PTET51.1.114.95612	PTET.51.1.G1140060	0	0	20	0	0	19	1.115	0	0.0106	0.305	0	0	5	0	0	5
PTET.51.1.G1230082	IESPGM.PTET51.1.123.137483	0.1064	0.0233	IESPGM.PTET51.1.144.158634	PTET.51.1.G1440086	0	0	7	0	0	8	0.405	0	0	2.115	0	0	25	0	0	24
PTET.51.1.G1230117	IESPGM.PTET51.1.123.207245	0.0115	0.0114	IESPGM.PTET51.1.144.92765	PTET.51.1.G1440049	0	0	3	0	0	5	0.23	0	0	0.05	0	0	0	0	0	1
PTET.51.1.G1230118	IESPGM.PTET51.1.123.211702	0.0106	0.0274	IESPGM.PTET51.1.144.88458	PTET.51.1.G1440048	0	0	6	0	0	7	1.01	0	0.0353	0.64	0	0	1	0	0	2
PTET.51.1.G0120021	IESPGM.PTET51.1.12.32429	0.0132	0.037	IESPGM.PTET51.1.97.237392	PTET.51.1.G0970151	0	0	154	0	0	149	12.695	0	0	37.605	0	0	406	0	0	321
PTET.51.1.G1240124	IESPGM.PTET51.1.124.218693	0.0122	0.0333	IESPGM.PTET51.1.88.286988	PTET.51.1.G0880158	0	0	19	0.1111	1	8	2.005	0	0	1.1	0	0	10	0	0	17
PTET.51.1.G1240155	IESPGM.PTET51.1.124.259769	0.061	0.1447	IESPGM.PTET51.1.88.332243	PTET.51.1.G0880190	0.0147	1	67	0.028	3	104	8.435	0	0	11.29	0	0	94	0	0	124
PTET.51.1.G0120276	IESPGM.PTET51.1.12.454157	0.0123	0.0333	IESPGM.PTET51.1.23.321976	PTET.51.1.G0230185	0	0	728	0	0	644	86.255	0	0	131.3	0	0	1032	0	0	801
PTET.51.1.G0010128	IESPGM.PTET51.1.1.246599	0.0112	0.0111	IESPGM.PTET51.1.8.150988	PTET.51.1.G0080097	0	0	11	0	0	5	1.08	0	0.0116	1.005	0	0	14	0	0	4
PTET.51.1.G1250165	IESPGM.PTET51.1.125.234366	0.0149	0.0253	IESPGM.PTET51.1.43.431816	PTET.51.1.G0430275	0	0	1	0	0	6	2.13	0	0	1.095	0	0	0	0	0	5
PTET.51.1.G1250023	IESPGM.PTET51.1.125.40106	0.0312	0.025	IESPGM.PTET51.1.43.228695	PTET.51.1.G0430131	0	0	26	0	0	9	1.77	0	0	1.125	0	0	25	0	0	16
PTET.51.1.G1250034	IESPGM.PTET51.1.125.56548	0.0244	0.0097	IESPGM.PTET51.1.43.245058	PTET.51.1.G0430141	0	0	5	0	0	5	0.885	0	0	1.825	0	0	7	0	0	4
PTET.51.1.G1260023	IESPGM.PTET51.1.126.50353	0.012	0.0267	IESPGM.PTET51.1.139.220865	PTET.51.1.G1390134	0	0	2	0	0	0	1.58	0	0	0.565	0	0	0	0	0	0
PTET.51.1.G1260023	IESPGM.PTET51.1.126.54465	0.0163	0.0227	IESPGM.PTET51.1.139.216741	PTET.51.1.G1390134	0	0	4	0	0	0	1.58	0	0.0303	0.565	0	0	1	0	0	0
PTET.51.1.G1270053	IESPGM.PTET51.1.127.116149	0.1494	0.137	IESPGM.PTET51.1.149.155884	PTET.51.1.G1490096	1	1	0	0	0	5	0.915	0	0	5.765	0	0	8	0	0	12
PTET.51.1.G1270106	IESPGM.PTET51.1.127.187206	0.012	0.0154	IESPGM.PTET51.1.149.90156	PTET.51.1.G1490052	0	0	12	0	0	24	3.1	0	0	17.355	0	0	73	0	0	81
PTET.51.1.G1270012	IESPGM.PTET51.1.127.36601	0.0167	0.0143	IESPGM.PTET51.1.149.213261	PTET.51.1.G1490129	0	0	37	0	0	120	5.985	0	0	11.3	0	0	116	0	0	251
PTET.51.1.G1270022	IESPGM.PTET51.1.127.50986	0.0149	0.0145	IESPGM.PTET51.1.149.199574	PTET.51.1.G1490120	0	0	32	0	0	31	2.405	0	0	20.62	0	0	228	0	0	245
PTET.51.1.G0010153	IESPGM.PTET51.1.1.276574	0.009	0.0149	IESPGM.PTET51.1.8.184911	PTET.51.1.G0080119	0	0	7	0	0	0	0.59	0	0.0135	0.395	0	0	1	0	0	6
PTET.51.1.G1280059	IESPGM.PTET51.1.128.103174	0.0533	0.0278	IESPGM.PTET51.1.147.58393	PTET.51.1.G1470045	0	0	0	0	0	0	0.115	0	0	0.54	0	0	2	0	0	2
PTET.51.1.G1280066	IESPGM.PTET51.1.128.112233	0.0115	0.0244	IESPGM.PTET51.1.147.67460	PTET.51.1.G1470052	0	0	9	0	0	5	1.405	0	0	8.81	0	0	45	0	0	59
PTET.51.1.G1280136	IESPGM.PTET51.1.128.235928	0.0104	0.0822	IESPGM.PTET51.1.147.149333	PTET.51.1.G1470113	0.05	1	19	0	0	11	1.395	0	0	2.525	0	0	48	0	0	37
PTET.51.1.G1280141	IESPGM.PTET51.1.128.241574	0.0164	0.0702	IESPGM.PTET51.1.147.154302	PTET.51.1.G1470118	0	0	1	0	0	5	1.345	0	0	7.425	0	0	29	0	0	29
PTET.51.1.G0010019	IESPGM.PTET51.1.1.28565	0.0132	0.0159	IESPGM.PTET51.1.8.9461	PTET.51.1.G0080008	0	0	0	0	0	0	0	0	0	0.1	0	0	1	0	0	0
PTET.51.1.G1290103	IESPGM.PTET51.1.129.179934	0.0127	0.0361	IESPGM.PTET51.1.2.150951	PTET.51.1.G0020081	0	0	36	0	0	16	1.645	0	0	2.095	0	0	25	0	0	15
PTET.51.1.G1290111	IESPGM.PTET51.1.129.190949	0.0102	0.0125	IESPGM.PTET51.1.2.143060	PTET.51.1.G0020074	0	0	26	0	0	30	3.775	0	0	1.92	0	0	12	0	0	12
PTET.51.1.G1300160	IESPGM.PTET51.1.130.253037	0.0172	0.0222	IESPGM.PTET51.1.140.21178	PTET.51.1.G1400018	0	0	2	0	0	1	0.13	0	0	5.635	0	0	16	0	0	26
PTET.51.1.G1310070	IESPGM.PTET51.1.131.115144	0.0268	0.0103	IESPGM.PTET51.1.104.165223	PTET.51.1.G1040088	0	0	0	0	0	0	0.07	0	0	6.615	0	0	56	0	0	41
PTET.51.1.G1310085	IESPGM.PTET51.1.131.150435	0.0109	0.0225	IESPGM.PTET51.1.104.192520	PTET.51.1.G1040107	0	0	649	0	0	486	68.95	0	0	48.16	0	0	625	0	0	516
PTET.51.1.G1310110	IESPGM.PTET51.1.131.199722	0.0141	0.0123	IESPGM.PTET51.1.104.232537	PTET.51.1.G1040131	0	0	6	0	0	7	0.665	0	0	0.725	0	0	12	0	0	4
PTET.51.1.G1310131	IESPGM.PTET51.1.131.230899	0.0185	0.011	IESPGM.PTET51.1.104.270122	PTET.51.1.G1040155	0	0	239	0	0	198	12.87	0	0.0137	0.74	0	0	17	0	0	14
PTET.51.1.G1310061	IESPGM.PTET51.1.131.98544	0.0132	0.011	IESPGM.PTET51.1.104.141702	PTET.51.1.G1040075	0	0	4	0	0	5	0.29	0	0	0.51	0	0	5	0	0	11
PTET.51.1.G1320055	IESPGM.PTET51.1.132.101258	0.0127	0.0308	IESPGM.PTET51.1.100.196923	PTET.51.1.G1000106	0	0	1	0	0	1	0.315	0	0	0.21	0	0	3	0	0	0
PTET.51.1.G1320066	IESPGM.PTET51.1.132.130846	0.0105	0.0114	IESPGM.PTET51.1.100.147746	PTET.51.1.G1000089	0	0	15	0	0	13	3.115	0	0	2.915	0	0	11	0	0	15
PTET.51.1.G1330127	IESPGM.PTET51.1.133.201687	0.029	0.0112	IESPGM.PTET51.1.116.53371	PTET.51.1.G1160029	0	0	4	0	0	3	0.915	0	0	0.33	0	0	0	0	0	0
PTET.51.1.G0130209	IESPGM.PTET51.1.13.338955	0.0106	0.0159	IESPGM.PTET51.1.32.259363	PTET.51.1.G0320145	0	0	6	0	0	6	0.645	0	0	0.535	0	0	2	0	0	1
PTET.51.1.G1340081	IESPGM.PTET51.1.134.111489	0.0241	0.0125	IESPGM.PTET51.1.157.129913	PTET.51.1.G1570087	0.0063	1	157	0.0189	2	104	19.84	0	0	20.94	0	0	201	0.0067	1	148
PTET.51.1.G1340081	IESPGM.PTET51.1.134.111566	0.0366	0.0133	IESPGM.PTET51.1.157.129990	PTET.51.1.G1570087	0	0	136	0	0	113	19.84	0	0	20.94	0	0	134	0	0	113
PTET.51.1.G1340126	IESPGM.PTET51.1.134.170408	0.0625	0.0515	IESPGM.PTET51.1.157.73632	PTET.51.1.G1570039	0	0	38	0.0244	1	40	7.765	0	0.0361	2.915	0	0	8	0	0	19
PTET.51.1.G1340031	IESPGM.PTET51.1.134.39483	0.0116	0.0118	IESPGM.PTET51.1.157.191959	PTET.51.1.G1570119	0	0	44	0	0	41	3.44	0	0	8.83	0	0	76	0	0	77
PTET.51.1.G0130277	IESPGM.PTET51.1.13.442112	0.0127	0.0123	IESPGM.PTET51.1.19.423511	PTET.51.1.G0190248	0	0	723	0	0	541	70.595	0	0	41.97	0	0	355	0	0	285
PTET.51.1.G1350062	IESPGM.PTET51.1.135.141924	0.0263	0.0185	IESPGM.PTET51.1.39.373524	PTET.51.1.G0390199	0	0	0	0	0	1	0.335	0	0	0.055	0	0	1	0	0	0
PTET.51.1.G1350093	IESPGM.PTET51.1.135.201960	0.0104	0.0108	IESPGM.PTET51.1.39.435203	PTET.51.1.G0390229	0	0	3	0	0	8	0.355	0	0	2.245	0	0	32	0	0	42
PTET.51.1.G0130344	IESPGM.PTET51.1.13.546116	0.0247	0.0143	IESPGM.PTET51.1.19.510048	PTET.51.1.G0190303	0	0	10	0	0	7	0.585	0	0.0119	0.97	0	0	9	0	0	10
PTET.51.1.G0010213	IESPGM.PTET51.1.1.354982	0.0132	0.0247	IESPGM.PTET51.1.8.251816	PTET.51.1.G0080170	0	0	11	0	0	22	2.51	0	0	0.645	0	0	4	0	0	6
PTET.51.1.G0130347	IESPGM.PTET51.1.13.555898	0.0118	0.0462	IESPGM.PTET51.1.19.520718	PTET.51.1.G0190308	0	0	6	0	0	4	0.595	0	0	0.735	0	0	6	0	0	2
PTET.51.1.G1350028	IESPGM.PTET51.1.135.56392	0.0154	0.0109	IESPGM.PTET51.1.39.302934	PTET.51.1.G0390173	0	0	58	0	0	50	5.26	0	0	19.805	0	0	264	0	0	222
PTET.51.1.G0010219	IESPGM.PTET51.1.1.358366	0.029	0.165	IESPGM.PTET51.1.8.255210	PTET.51.1.G0080173	0	0	27	0.08	2	23	366.88	0	0	327.72	0	0	55	0	0	53
PTET.51.1.G0130365	IESPGM.PTET51.1.13.587192	0.0135	0.0132	IESPGM.PTET51.1.19.544341	PTET.51.1.G0190321	0	0	0	0	0	3	0.28	0	0	0.385	0	0	1	0	0	0
PTET.51.1.G1360067	IESPGM.PTET51.1.136.120744	0.0211	0.0161	IESPGM.PTET51.1.74.283115	PTET.51.1.G0740162	0	0	14	0	0	5	0.775	0	0	1.78	0	0	33	0	0	34
PTET.51.1.G1370088	IESPGM.PTET51.1.137.141687	0.0105	0.0299	IESPGM.PTET51.1.27.129163	PTET.51.1.G0270075	0	0	0	0	0	0	0.015	0	0	0.11	0	0	0	0	0	1
PTET.51.1.G1370088	IESPGM.PTET51.1.137.141707	0.0116	0.0303	IESPGM.PTET51.1.27.129143	PTET.51.1.G0270075	0	0	0	0	0	0	0.015	0	0	0.11	0	0	0	0	0	1
PTET.51.1.G1370147	IESPGM.PTET51.1.137.251646	0.0133	0.0108	IESPGM.PTET51.1.27.10563	PTET.51.1.G0270007	0	0	24	0	0	23	3.035	0	0	2.895	0	0	28	0	0	20
PTET.51.1.G1380105	IESPGM.PTET51.1.138.158438	0.0122	0.0123	IESPGM.PTET51.1.80.258722	PTET.51.1.G0800187	0	0	13	0	0	13	0.96	0	0.0119	0.845	0	0	10	0	0	3
PTET.51.1.G1380018	IESPGM.PTET51.1.138.30137	0.0521	0.0429	IESPGM.PTET51.1.80.132524	PTET.51.1.G0800098	0	0	0	0	0	0	0.12	0	0.0169	0.45	0	0	2	0	0	4
PTET.51.1.G1390107	IESPGM.PTET51.1.139.156827	0.0198	0.0145	IESPGM.PTET51.1.126.109556	PTET.51.1.G1260046	0	0	2	0	0	1	0.155	0	0	0.255	0	0	0	0	0	2
PTET.51.1.G1390116	IESPGM.PTET51.1.139.179561	0.0192	0.0185	IESPGM.PTET51.1.126.90973	PTET.51.1.G1260038	0	0	179	0	0	109	32.935	0	0	0.315	0	0	2	0	0	0
PTET.51.1.G1400087	IESPGM.PTET51.1.140.122085	0.0161	0.0417	IESPGM.PTET51.1.130.132792	PTET.51.1.G1300087	0.0123	1	80	0.0441	3	65	5.055	0	0	3.975	0	0	29	0	0	51
PTET.51.1.G1410066	IESPGM.PTET51.1.141.132568	0.0133	0.026	IESPGM.PTET51.1.167.104272	PTET.51.1.G1670069	0	0	24	0	0	16	1.625	0	0.0185	0.125	0	0	0	0	0	2
PTET.51.1.G1410067	IESPGM.PTET51.1.141.135335	0.0108	0.0357	IESPGM.PTET51.1.167.98525	PTET.51.1.G1670068	0	0	28	0	0	29	1.63	0	0	1.52	0	0	14	0	0	19
PTET.51.1.G1410121	IESPGM.PTET51.1.141.232135	0.0183	0.0549	IESPGM.PTET51.1.167.28880	PTET.51.1.G1670018	0	0	13	0	0	8	1.435	0	0	0.875	0	0	2	0	0	9
PTET.51.1.G1410046	IESPGM.PTET51.1.141.77663	0.0161	0.1053	IESPGM.PTET51.1.167.154954	PTET.51.1.G1670090	0	0	0	0	0	0	0.09	0	0	0.18	0	0	2	0	0	0
PTET.51.1.G1420088	IESPGM.PTET51.1.142.149372	0.025	0.0263	IESPGM.PTET51.1.164.165916	PTET.51.1.G1640104	0	0	11	0	0	4	1.125	0	0	2.25	0	0	16	0	0	10
PTET.51.1.G0140161	IESPGM.PTET51.1.14.265991	0.0118	0.0139	IESPGM.PTET51.1.42.295731	PTET.51.1.G0420193	0	0	8	0	0	11	3.455	0	0	5.45	0	0	17	0	0	18
PTET.51.1.G0140170	IESPGM.PTET51.1.14.277024	0.0097	0.0227	IESPGM.PTET51.1.42.286291	PTET.51.1.G0420186	0	0	8	0	0	9	1.605	0	0	2.335	0	0	7	0	0	6
PTET.51.1.G0140171	IESPGM.PTET51.1.14.279509	0.0222	0.0274	IESPGM.PTET51.1.42.283808	PTET.51.1.G0420185	0	0	74	0	0	71	10.5	0	0	0.04	0	0	0	0	0	1
PTET.51.1.G1420049	IESPGM.PTET51.1.142.86292	0.0119	0.013	IESPGM.PTET51.1.164.90647	PTET.51.1.G1640060	0	0	10	0	0	4	1.02	0	0	1.275	0	0	16	0	0	7
PTET.51.1.G0140180	IESPGM.PTET51.1.14.306112	0.0118	0.0114	IESPGM.PTET51.1.42.273915	PTET.51.1.G0420178	0	0	78	0	0	84	12.605	0	0.0128	5.205	0	0	42	0	0	38
PTET.51.1.G1430066	IESPGM.PTET51.1.143.98273	0.0303	0.02	IESPGM.PTET51.1.47.343297	PTET.51.1.G0470178	0	0	6	0	0	14	0.62	0	0	1.88	0	0	23	0	0	16
PTET.51.1.G1440088	IESPGM.PTET51.1.144.159374	0.141	0.0959	IESPGM.PTET51.1.123.136738	PTET.51.1.G1230080	0	0	3	0	0	8	0.33	0	0.0115	0.405	0	0	18	0	0	7
PTET.51.1.G1440020	IESPGM.PTET51.1.144.42138	0.0128	0.0435	IESPGM.PTET51.1.123.261447	PTET.51.1.G1230145	0	0	16	0	0	9	1.125	0	0	0.42	0	0	4	0	0	3
PTET.51.1.G1440048	IESPGM.PTET51.1.144.88164	0.011	0.0133	IESPGM.PTET51.1.123.211996	PTET.51.1.G1230118	0	0	9	0	0	6	0.64	0	0	1.01	0	0	16	0	0	7
PTET.51.1.G1440049	IESPGM.PTET51.1.144.93022	0.013	0.0267	IESPGM.PTET51.1.123.206988	PTET.51.1.G1230117	0	0	0	0	0	1	0.05	0	0	0.23	0	0	1	0	0	2
PTET.51.1.G1450080	IESPGM.PTET51.1.145.129505	0.0123	0.0114	IESPGM.PTET51.1.152.130918	PTET.51.1.G1520079	0	0	2	0	0	2	0.265	0	0.0278	0.175	0	0	1	0	0	0
PTET.51.1.G1450083	IESPGM.PTET51.1.145.135330	0.0109	0.0101	IESPGM.PTET51.1.152.137817	PTET.51.1.G1520083	0	0	112	0	0	182	12.205	0	0	20.965	0	0	99	0	0	264
PTET.51.1.G1450134	IESPGM.PTET51.1.145.202921	0.0317	0.044	IESPGM.PTET51.1.152.198039	PTET.51.1.G1520122	0	0	3	0	0	0	0.395	0	0	2.1	0	0	25	0	0	10
PTET.51.1.G1450134	IESPGM.PTET51.1.145.204931	0.0141	0.0286	IESPGM.PTET51.1.152.200058	PTET.51.1.G1520122	0	0	12	0	0	6	0.395	0	0	2.1	0	0	36	0	0	24
PTET.51.1.G1450138	IESPGM.PTET51.1.145.211265	0.0141	0.0169	IESPGM.PTET51.1.152.207994	PTET.51.1.G1520127	0	0	3	0	0	3	0.215	0	0	0.12	0	0	2	0	0	0
PTET.51.1.G1460064	IESPGM.PTET51.1.146.124574	0.0141	0.029	IESPGM.PTET51.1.170.43691	PTET.51.1.G1700021	0	0	4	0	0	4	0.35	0	0	0.075	0	0	0	0	0	0
PTET.51.1.G1470076	IESPGM.PTET51.1.147.101023	0.0227	0.1099	IESPGM.PTET51.1.128.147109	PTET.51.1.G1280093	0.1875	3	13	0.2	4	16	1.345	0	0	2.535	0	0	29	0	0	25
PTET.51.1.G1470118	IESPGM.PTET51.1.147.154630	0.0625	0.0247	IESPGM.PTET51.1.128.241902	PTET.51.1.G1280141	0	0	66	0	0	58	7.425	0	0	1.345	0	0	9	0	0	17
PTET.51.1.G1470143	IESPGM.PTET51.1.147.185216	0.0217	0.0423	IESPGM.PTET51.1.176.68048	PTET.51.1.G1760040	0	0	54	0	0	50	8.76	0	0	0.655	0	0	12	0	0	17
PTET.51.1.G1470070	IESPGM.PTET51.1.147.92649	0.0122	0.0122	IESPGM.PTET51.1.128.139581	PTET.51.1.G1280088	0	0	92	0	0	91	208.63	0	0	198.565	0	0	112	0	0	136
PTET.51.1.G1480151	IESPGM.PTET51.1.148.210687	0.0122	0.01	IESPGM.PTET51.1.103.264667	PTET.51.1.G1030163	0	0	0	0	0	1	255.775	0	0	153.69	0	0	0	0	0	0
PTET.51.1.G1480154	IESPGM.PTET51.1.148.216240	0.038	0.0263	IESPGM.PTET51.1.103.273807	PTET.51.1.G1030169	0	0	4	0	0	1	0.615	0	0	0.865	0	0	8	0	0	19
PTET.51.1.G1480002	IESPGM.PTET51.1.148.4402	0.0291	0.0115	IESPGM.PTET51.1.103.19395	PTET.51.1.G1030011	0	0	31	0	0	6	2.38	0	0.0132	1.985	0	0	14	0	0	17
PTET.51.1.G1480050	IESPGM.PTET51.1.148.73743	0.0215	0.0267	IESPGM.PTET51.1.103.93831	PTET.51.1.G1030061	0	0	21	0	0	10	2.165	0	0	1.03	0	0	15	0	0	6
PTET.51.1.G1480050	IESPGM.PTET51.1.148.73818	0.022	0.0241	IESPGM.PTET51.1.103.93906	PTET.51.1.G1030061	0	0	27	0	0	13	2.165	0	0	1.03	0	0	15	0	0	7
PTET.51.1.G1490091	IESPGM.PTET51.1.149.152401	0.0282	0.0282	IESPGM.PTET51.1.127.119857	PTET.51.1.G1270060	0	0	39	0	0	41	2.905	0	0	3.48	0	0	17	0	0	31
PTET.51.1.G1490127	IESPGM.PTET51.1.149.209646	0.0105	0.0156	IESPGM.PTET51.1.127.39396	PTET.51.1.G1270014	0	0	60	0	0	52	6.815	0	0	12.12	0	0	75	0	0	85
PTET.51.1.G1490131	IESPGM.PTET51.1.149.216705	0.0128	0.0253	IESPGM.PTET51.1.127.33157	PTET.51.1.G1270011	0	0	7	0	0	3	1.335	0	0	0.94	0	0	3	0	0	4
PTET.51.1.G1490134	IESPGM.PTET51.1.149.225119	0.0097	0.0092	IESPGM.PTET51.1.127.25069	PTET.51.1.G1270009	0	0	17	0	0	17	3.165	0	0	0.96	0	0	8	0	0	3
PTET.51.1.G1500075	IESPGM.PTET51.1.150.147736	0.0115	0.0244	IESPGM.PTET51.1.51.127127	PTET.51.1.G0510068	0	0	8	0	0	5	1.155	0	0	0.215	0	0	4	0	0	0
PTET.51.1.G1500110	IESPGM.PTET51.1.150.198404	0.0108	0.01	IESPGM.PTET51.1.51.51173	PTET.51.1.G0510022	0	0	6	0	0	3	0.935	0	0	2.255	0	0	13	0	0	6
PTET.51.1.G1500120	IESPGM.PTET51.1.150.217089	0.0123	0.0152	IESPGM.PTET51.1.51.31058	PTET.51.1.G0510012	0	0	3	0	0	3	2.025	0	0.0172	1.95	0	0	2	0	0	2
PTET.51.1.G1510071	IESPGM.PTET51.1.151.109184	0.0206	0.0139	IESPGM.PTET51.1.161.99485	PTET.51.1.G1610065	0	0	29	0	0	24	4.09	0	0	1.625	0	0	11	0	0	12
PTET.51.1.G0150048	IESPGM.PTET51.1.15.131051	0.0132	0.0282	IESPGM.PTET51.1.25.124329	PTET.51.1.G0250054	0	0	5	0	0	3	0.495	0	0	2.615	0	0	12	0	0	15
PTET.51.1.G1510066	IESPGM.PTET51.1.151.98317	0.0135	0.0204	IESPGM.PTET51.1.161.86535	PTET.51.1.G1610057	0	0	52	0	0	45	5.41	0	0	4.17	0	0	57	0	0	50
PTET.51.1.G1520057	IESPGM.PTET51.1.152.104617	0.0135	0.0137	IESPGM.PTET51.1.145.103050	PTET.51.1.G1450059	0	0	18	0	0	7	1.635	0	0	0.72	0	0	5	0	0	0
PTET.51.1.G1520062	IESPGM.PTET51.1.152.110370	0.013	0.0233	IESPGM.PTET51.1.145.107254	PTET.51.1.G1450063	0.0175	2	112	0.0286	3	102	10.02	0	0	5.3	0	0	63	0	0	64
PTET.51.1.G1520093	IESPGM.PTET51.1.152.155558	0.0189	0.0196	IESPGM.PTET51.1.145.149658	PTET.51.1.G1450095	0	0	18	0	0	11	1.445	0	0	1.11	0	0	7	0	0	7
PTET.51.1.G1520093	IESPGM.PTET51.1.152.155620	0.0392	0.0175	IESPGM.PTET51.1.145.149720	PTET.51.1.G1450095	0	0	21	0	0	14	1.445	0	0.0139	1.11	0	0	12	0	0	10
PTET.51.1.G1520037	IESPGM.PTET51.1.152.70377	0.0112	0.0143	IESPGM.PTET51.1.145.72611	PTET.51.1.G1450033	0	0	0	0	0	3	2.24	0	0	4.64	0	0	1	0	0	2
PTET.51.1.G0150013	IESPGM.PTET51.1.15.28438	0.0106	0.0128	IESPGM.PTET51.1.25.37831	PTET.51.1.G0250020	0	0	0	0	0	0	0.155	0	0	0.255	0	0	1	0	0	0
PTET.51.1.G0150013	IESPGM.PTET51.1.15.28696	0.0123	0.0123	IESPGM.PTET51.1.25.38128	PTET.51.1.G0250020	0	0	1	0	0	0	0.155	0	0	0.255	0	0	2	0	0	1
PTET.51.1.G0150013	IESPGM.PTET51.1.15.28833	0.022	0.0116	IESPGM.PTET51.1.25.38265	PTET.51.1.G0250020	0	0	1	0	0	0	0.155	0	0	0.255	0	0	4	0	0	0
PTET.51.1.G0150013	IESPGM.PTET51.1.15.29133	0.0119	0.0101	IESPGM.PTET51.1.25.38565	PTET.51.1.G0250020	0	0	0	0	0	1	0.155	0	0	0.255	0	0	1	0	0	0
PTET.51.1.G1530014	IESPGM.PTET51.1.153.30415	0.0128	0.0241	IESPGM.PTET51.1.110.254182	PTET.51.1.G1100153	0	0	11	0	0	9	0.845	0	0.0227	0.755	0	0	5	0	0	1
PTET.51.1.G1530017	IESPGM.PTET51.1.153.35575	0.0132	0.0139	IESPGM.PTET51.1.110.250033	PTET.51.1.G1100151	0	0	5	0	0	3	0.435	0	0	0.73	0	0	8	0	0	13
PTET.51.1.G0150279	IESPGM.PTET51.1.15.499499	0.0128	0.0208	IESPGM.PTET51.1.25.445336	PTET.51.1.G0250259	0	0	10	0	0	7	0.645	0	0	0.405	0	0	10	0	0	1
PTET.51.1.G1550087	IESPGM.PTET51.1.155.148220	0.0133	0.0227	IESPGM.PTET51.1.107.111776	PTET.51.1.G1070066	0	0	8	0	0	11	0.675	0	0	0.945	0	0	15	0	0	26
PTET.51.1.G1550097	IESPGM.PTET51.1.155.156824	0.0123	0.0127	IESPGM.PTET51.1.107.103028	PTET.51.1.G1070060	0	0	70	0	0	79	11.795	0	0	14.635	0	0	68	0	0	68
PTET.51.1.G1550097	IESPGM.PTET51.1.155.156867	0.0217	0.0119	IESPGM.PTET51.1.107.102985	PTET.51.1.G1070060	0	0	81	0	0	91	11.795	0	0	14.635	0	0	83	0	0	91
PTET.51.1.G1550098	IESPGM.PTET51.1.155.158378	0.0156	0.0278	IESPGM.PTET51.1.107.101486	PTET.51.1.G1070059	0	0	32	0	0	34	4.795	0	0.0115	2.85	0	0	19	0	0	25
PTET.51.1.G1550117	IESPGM.PTET51.1.155.187039	0.0392	0.0169	IESPGM.PTET51.1.107.54838	PTET.51.1.G1070034	0	0	7	0	0	8	0.94	0	0	1.935	0	0	21	0	0	15
PTET.51.1.G1550135	IESPGM.PTET51.1.155.209430	0.0309	0.0119	IESPGM.PTET51.1.107.31407	PTET.51.1.G1070015	0	0	16	0	0	14	2.855	0	0.0132	1.105	0	0	6	0	0	8
PTET.51.1.G1550048	IESPGM.PTET51.1.155.84993	0.0299	0.0182	IESPGM.PTET51.1.107.187379	PTET.51.1.G1070108	0	0	3	0	0	6	1.055	0	0	1.995	0	0	17	0	0	23
PTET.51.1.G0150003	IESPGM.PTET51.1.15.6393	0.0172	0.0345	IESPGM.PTET51.1.25.15217	PTET.51.1.G0250010	0	0	0	0	0	4	1.255	0	0.0333	1.96	0	0	14	0	0	21
PTET.51.1.G1570094	IESPGM.PTET51.1.157.139271	0.0127	0.0263	IESPGM.PTET51.1.134.121304	PTET.51.1.G1340090	0	0	215	0	0	167	25.18	0	0	53.855	0	0	493	0	0	389
PTET.51.1.G1570103	IESPGM.PTET51.1.157.151616	0.0253	0.0152	IESPGM.PTET51.1.134.146904	PTET.51.1.G1340105	0	0	17	0	0	15	2.36	0	0	0.53	0	0	2	0	0	4
PTET.51.1.G0150028	IESPGM.PTET51.1.15.79527	0.0357	0.0784	IESPGM.PTET51.1.25.73972	PTET.51.1.G0250031	0.5	1	1	0	0	2	0.085	0	0.0087	0.085	0	0	2	0	0	0
PTET.51.1.G0150028	IESPGM.PTET51.1.15.79839	0.025	0.0137	IESPGM.PTET51.1.25.74296	PTET.51.1.G0250031	0	0	2	0	0	1	0.085	0	0	0.085	0	0	1	0	0	0
PTET.51.1.G1580054	IESPGM.PTET51.1.158.136491	0.0225	0.0225	IESPGM.PTET51.1.86.230276	PTET.51.1.G0860157	0	0	3	0	0	5	0.64	0	0	0.855	0	0	6	0	0	2
PTET.51.1.G1580054	IESPGM.PTET51.1.158.137156	0.0196	0.0099	IESPGM.PTET51.1.86.229611	PTET.51.1.G0860157	0	0	5	0	0	1	0.64	0	0	0.855	0	0	3	0	0	3
PTET.51.1.G1580062	IESPGM.PTET51.1.158.151025	0.0159	0.0152	IESPGM.PTET51.1.86.213116	PTET.51.1.G0860146	0	0	12	0	0	7	0.84	0	0	0.42	0	0	1	0	0	2
PTET.51.1.G1580069	IESPGM.PTET51.1.158.166464	0.0156	0.0102	IESPGM.PTET51.1.86.192879	PTET.51.1.G0860135	0	0	290	0	0	292	30.235	0	0	84.945	0	0	774	0	0	630
PTET.51.1.G1590061	IESPGM.PTET51.1.159.100704	0.0125	0.0141	IESPGM.PTET51.1.74.80437	PTET.51.1.G0740047	0	0	361	0	0	665	56.445	0	0	53.86	0	0	378	0	0	684
PTET.51.1.G1590036	IESPGM.PTET51.1.159.58917	0.0233	0.0227	IESPGM.PTET51.1.74.27152	PTET.51.1.G0740017	0	0	12	0	0	21	1.345	0	0	0.765	0	0	6	0.0833	1	11
PTET.51.1.G1590056	IESPGM.PTET51.1.159.92971	0.0192	0.0185	IESPGM.PTET51.1.74.72675	PTET.51.1.G0740042	0	0	8	0	0	6	0.88	0	0.0263	2.02	0	0	24	0	0	13
PTET.51.1.G1600091	IESPGM.PTET51.1.160.144146	0.0192	0.0263	IESPGM.PTET51.1.172.93472	PTET.51.1.G1720053	0	0	21	0	0	26	2.76	0	0	2.765	0	0	41	0	0	21
PTET.51.1.G1600103	IESPGM.PTET51.1.160.167028	0.0109	0.0152	IESPGM.PTET51.1.172.118995	PTET.51.1.G1720069	0	0	6	0	0	1	0.24	0	0	0.795	0	0	3	0	0	5
PTET.51.1.G1600107	IESPGM.PTET51.1.160.171006	0.0147	0.0118	IESPGM.PTET51.1.172.123380	PTET.51.1.G1720073	0	0	16	0	0	21	1.92	0	0	0.625	0	0	7	0	0	5
PTET.51.1.G1600057	IESPGM.PTET51.1.160.95975	0.0111	0.0112	IESPGM.PTET51.1.172.51276	PTET.51.1.G1720022	0	0	10	0	0	5	1.42	0	0	0.845	0	0	7	0	0	3
PTET.51.1.G1610081	IESPGM.PTET51.1.161.122774	0.0135	0.0164	IESPGM.PTET51.1.151.130899	PTET.51.1.G1510087	0	0	10	0	0	11	2.425	0	0	0.065	0	0	0	0	0	0
PTET.51.1.G1620088	IESPGM.PTET51.1.162.146497	0.0125	0.0139	IESPGM.PTET51.1.80.80507	PTET.51.1.G0800057	0	0	11	0	0	12	1.52	0	0	0.445	0	0	4	0	0	2
PTET.51.1.G0160153	IESPGM.PTET51.1.16.241415	0.0164	0.0141	IESPGM.PTET51.1.5.331364	PTET.51.1.G0050208	0	0	220	0	0	162	21.465	0	0	17.295	0	0	216	0	0	121
PTET.51.1.G1630057	IESPGM.PTET51.1.163.120063	0.0127	0.0164	IESPGM.PTET51.1.68.295040	PTET.51.1.G0680157	0	0	5	0	0	3	0.375	0	0	0.52	0	0	1	0	0	2
PTET.51.1.G1630085	IESPGM.PTET51.1.163.170253	0.0137	0.012	IESPGM.PTET51.1.68.345165	PTET.51.1.G0680184	0	0	444	0	0	544	33.88	0	0	5.275	0	0	36	0	0	64
PTET.51.1.G0160201	IESPGM.PTET51.1.16.322334	0.0169	0.0147	IESPGM.PTET51.1.5.435959	PTET.51.1.G0050270	0.0145	2	136	0.0102	1	97	15.975	0	0	31.855	0.0084	2	237	0	0	245
PTET.51.1.G1630018	IESPGM.PTET51.1.163.33697	0.0123	0.0139	IESPGM.PTET51.1.68.196373	PTET.51.1.G0680115	0	0	7	0	0	0	0.305	0	0.0106	0.195	0	0	2	0	0	6
PTET.51.1.G1630028	IESPGM.PTET51.1.163.58843	0.0118	0.0122	IESPGM.PTET51.1.68.232476	PTET.51.1.G0680127	0	0	742	0	0	619	144.93	0	0.0159	6.55	0	0	36	0	0	34
PTET.51.1.G0160261	IESPGM.PTET51.1.16.406298	0.0128	0.0116	IESPGM.PTET51.1.5.507400	PTET.51.1.G0050320	0	0	972	0	0	1021	150.56	0	0	81.58	0	0	458	0	0	443
PTET.51.1.G0160270	IESPGM.PTET51.1.16.417994	0.0108	0.0132	IESPGM.PTET51.1.5.517607	PTET.51.1.G0050328	0	0	0	0	0	0	0.175	0	0	0.905	0	0	1	0	0	2
PTET.51.1.G1640125	IESPGM.PTET51.1.164.191750	0.0366	0.2128	IESPGM.PTET51.1.142.173886	PTET.51.1.G1420104	0	0	7	0	0	1	0.45	0	0	2.98	0	0	20	0	0	22
PTET.51.1.G0160288	IESPGM.PTET51.1.16.459501	0.0309	0.0667	IESPGM.PTET51.1.5.556944	PTET.51.1.G0050349	0	0	10	0.0833	1	11	1.045	0	0	21.265	0	0	231	0	0	320
PTET.51.1.G0160346	IESPGM.PTET51.1.16.564006	0.0206	0.0116	IESPGM.PTET51.1.5.732851	PTET.51.1.G0050428	0	0	15	0	0	22	1.115	0	0	4.68	0	0	100	0	0	65
PTET.51.1.G1670071	IESPGM.PTET51.1.167.110856	0.0125	0.0179	IESPGM.PTET51.1.141.122977	PTET.51.1.G1410064	0	0	26	0	0	13	2.97	0	0.0141	3.68	0	0	12	0	0	27
PTET.51.1.G1670079	IESPGM.PTET51.1.167.129300	0.0123	0.0111	IESPGM.PTET51.1.141.97224	PTET.51.1.G1410055	0	0	8	0	0	1	0.385	0	0.0099	0.295	0	0	5	0	0	3
PTET.51.1.G1670106	IESPGM.PTET51.1.167.179287	0.013	0.0159	IESPGM.PTET51.1.141.48485	PTET.51.1.G1410032	0	0	0	0	0	1	0.055	0	0	0.04	0	0	0	0	0	1
PTET.51.1.G1670112	IESPGM.PTET51.1.167.189396	0.0116	0.027	IESPGM.PTET51.1.141.41347	PTET.51.1.G1410027	0	0	17	0	0	7	1.05	0	0	0.75	0	0	10	0	0	11
PTET.51.1.G1670029	IESPGM.PTET51.1.167.45983	0.0238	0.0103	IESPGM.PTET51.1.141.205458	PTET.51.1.G1410108	0	0	20	0	0	13	1.915	0	0	0.96	0	0	3	0	0	5
PTET.51.1.G1680046	IESPGM.PTET51.1.168.78317	0.011	0.0112	IESPGM.PTET51.1.165.86135	PTET.51.1.G1650056	0	0	24	0	0	19	3.425	0	0	2.75	0	0	6	0	0	2
PTET.51.1.G1700080	IESPGM.PTET51.1.170.153538	0.0328	0.0132	IESPGM.PTET51.1.146.205599	PTET.51.1.G1460114	0	0	11	0	0	9	1.16	0	0	1.005	0	0	12	0	0	4
PTET.51.1.G1710077	IESPGM.PTET51.1.171.150604	0.9192	0.0625	IESPGM.PTET51.1.27.335367	PTET.51.1.G0270180	0	0	2	0	0	0	0.255	0	0.0152	9.78	0	0	70	0	0	76
PTET.51.1.G1710021	IESPGM.PTET51.1.171.49482	0.0196	0.012	IESPGM.PTET51.1.27.447419	PTET.51.1.G0270232	0	0	1	0	0	2	0.455	0	0	0.26	0	0	1	0	0	6
PTET.51.1.G1710021	IESPGM.PTET51.1.171.49504	0.0104	0.0115	IESPGM.PTET51.1.27.447441	PTET.51.1.G0270232	0	0	2	0	0	2	0.455	0	0	0.26	0	0	3	0	0	4
PTET.51.1.G1710025	IESPGM.PTET51.1.171.58904	0.0147	0.0597	IESPGM.PTET51.1.27.420939	PTET.51.1.G0270225	0	0	3	0	0	0	0.055	0	0.0351	0.3	0	0	2	0	0	0
PTET.51.1.G0170102	IESPGM.PTET51.1.17.175752	0.0075	0.0088	IESPGM.PTET51.1.49.321688	PTET.51.1.G0490184	0	0	3	0	0	2	0.265	0	0	3.455	0	0	42	0	0	26
PTET.51.1.G1720018	IESPGM.PTET51.1.172.35123	0.0253	0.0274	IESPGM.PTET51.1.160.86718	PTET.51.1.G1600051	0	0	1	0	0	1	0.375	0	0	0.19	0	0	0	0	0	1
PTET.51.1.G1720042	IESPGM.PTET51.1.172.80631	0.0132	0.0156	IESPGM.PTET51.1.160.128593	PTET.51.1.G1600080	0	0	15	0	0	12	0	0	0	4.18	0	0	29	0	0	19
PTET.51.1.G0170347	IESPGM.PTET51.1.17.609287	0.0349	0.02	IESPGM.PTET51.1.179.53343	PTET.51.1.G1790033	0	0	34	0	0	28	2.785	0	0	1.89	0	0	16	0	0	15
PTET.51.1.G1760049	IESPGM.PTET51.1.176.84346	0.012	0.0471	IESPGM.PTET51.1.147.208504	PTET.51.1.G1470158	0	0	2	0	0	1	0.4	0	0	0.33	0	0	0	0	0	2
PTET.51.1.G0010459	IESPGM.PTET51.1.1.770280	0.0141	0.0149	IESPGM.PTET51.1.8.607681	PTET.51.1.G0080376	0	0	9	0	0	6	1.1	0	0	1.49	0	0	20	0	0	26
PTET.51.1.G1770011	IESPGM.PTET51.1.177.29000	0.0253	0.023	IESPGM.PTET51.1.43.151356	PTET.51.1.G0430094	0	0	35	0	0	24	2.455	0	0	5.275	0	0	43	0	0	43
PTET.51.1.G1770031	IESPGM.PTET51.1.177.58728	0.025	0.0137	IESPGM.PTET51.1.43.105965	PTET.51.1.G0430067	0	0	13	0	0	14	1.33	0	0	9.86	0	0	122	0	0	125
PTET.51.1.G1780006	IESPGM.PTET51.1.178.10358	0.0139	0.0156	IESPGM.PTET51.1.68.18806	PTET.51.1.G0680008	0	0	6	0	0	33	1.695	0	0	5.19	0	0	57	0	0	72
PTET.51.1.G1780039	IESPGM.PTET51.1.178.55570	0.0128	0.0127	IESPGM.PTET51.1.68.70153	PTET.51.1.G0680049	0	0	263	0	0	219	26.175	0	0	15.355	0	0	122	0	0	133
PTET.51.1.G1790048	IESPGM.PTET51.1.179.71934	0.0208	0.0137	IESPGM.PTET51.1.17.624225	PTET.51.1.G0170360	0	0	2	0	0	2	0.415	0	0	0.41	0	0	5	0	0	6
PTET.51.1.G1800032	IESPGM.PTET51.1.180.57039	0.0087	0.0125	IESPGM.PTET51.1.53.65973	PTET.51.1.G0530035	0	0	0	0	0	3	1.29	0	0.06	1.85	0	0	4	0	0	2
PTET.51.1.G1820023	IESPGM.PTET51.1.182.43097	0.0133	0.0222	IESPGM.PTET51.1.30.473112	PTET.51.1.G0300286	0	0	197	0	0	212	17.005	0	0	29.42	0	0	300	0	0	360
PTET.51.1.G0180178	IESPGM.PTET51.1.18.314898	0.0198	0.018	IESPGM.PTET51.1.44.253009	PTET.51.1.G0440143	0	0	6	0	0	3	1.09	0	0	1.92	0	0	18	0	0	18
PTET.51.1.G1840038	IESPGM.PTET51.1.184.57783	0.0161	0.0323	IESPGM.PTET51.1.39.145925	PTET.51.1.G0390092	0	0	6	0	0	7	2.33	0	0	2.385	0	0	14	0	0	2
PTET.51.1.G1850023	IESPGM.PTET51.1.185.38631	0.0132	0.0127	IESPGM.PTET51.1.75.24012	PTET.51.1.G0750011	0	0	95	0	0	75	4.125	0	0.0125	5.49	0	0	126	0	0	93
PTET.51.1.G0180314	IESPGM.PTET51.1.18.563485	0.0108	0.0103	IESPGM.PTET51.1.44.23795	PTET.51.1.G0440017	0	0	7	0	0	16	1.705	0	0.0206	1.395	0	0	8	0	0	27
PTET.51.1.G1870017	IESPGM.PTET51.1.187.25327	0.0116	0.0137	IESPGM.PTET51.1.174.22508	PTET.51.1.G1740012	0	0	44	0	0	22	3.99	0	0	2.2	0	0	15	0	0	12
PTET.51.1.G1870021	IESPGM.PTET51.1.187.33037	0.0225	0.0159	IESPGM.PTET51.1.174.39520	PTET.51.1.G1740017	0	0	31	0	0	48	6.7	0	0	3.8	0	0	30	0	0	30
PTET.51.1.G1910020	IESPGM.PTET51.1.191.23735	0.023	0.0135	IESPGM.PTET51.1.90.82914	PTET.51.1.G0900055	0	0	36	0	0	132	9.14	0	0	3.025	0	0	23	0	0	52
PTET.51.1.G0190233	IESPGM.PTET51.1.19.398885	0.0082	0.027	IESPGM.PTET51.1.13.414049	PTET.51.1.G0130256	0	0	130	0	0	149	20.66	0	0.0392	14.27	0	0	99	0	0	62
PTET.51.1.G0190263	IESPGM.PTET51.1.19.450111	0.0115	0.0114	IESPGM.PTET51.1.13.470930	PTET.51.1.G0130295	0	0	2	0	0	6	0.93	0	0.0175	0.52	0	0	5	0	0	2
PTET.51.1.G0190267	IESPGM.PTET51.1.19.456142	0.0204	0.012	IESPGM.PTET51.1.13.474352	PTET.51.1.G0130297	0	0	7	0	0	2	0.495	0	0.0132	1.27	0	0	11	0	0	12
PTET.51.1.G0200081	IESPGM.PTET51.1.20.161833	0.0185	0.0274	IESPGM.PTET51.1.156.78034	PTET.51.1.G1560053	0	0	111	0	0	140	8.52	0	0	2.935	0	0	28	0	0	34
PTET.51.1.G0200081	IESPGM.PTET51.1.20.161874	0.0167	0.0417	IESPGM.PTET51.1.156.77993	PTET.51.1.G1560053	0	0	112	0	0	145	8.52	0	0	2.935	0	0	30	0	0	37
PTET.51.1.G0200086	IESPGM.PTET51.1.20.169871	0.16	0.1163	IESPGM.PTET51.1.156.68716	PTET.51.1.G1560047	0	0	1	0	0	0	0.08	0	0	2.61	0	0	16	0	0	8
PTET.51.1.G0200127	IESPGM.PTET51.1.20.224053	0.0119	0.025	IESPGM.PTET51.1.156.30441	PTET.51.1.G1560020	0	0	78	0.0238	2	82	6.9	0	0	12.055	0	0	157	0	0	136
PTET.51.1.G0200170	IESPGM.PTET51.1.20.293977	0.0125	0.012	IESPGM.PTET51.1.82.300847	PTET.51.1.G0820189	0	0	41	0	0	37	6.315	0	0	1.545	0	0	8	0	0	6
PTET.51.1.G0200292	IESPGM.PTET51.1.20.496162	0.0297	0.0519	IESPGM.PTET51.1.32.422839	PTET.51.1.G0320249	0	0	0	0.4	2	3	0.235	0	0	5.045	0	0	41	0	0	18
PTET.51.1.G0210003	IESPGM.PTET51.1.21.10139	0.0375	0.0102	IESPGM.PTET51.1.36.491197	PTET.51.1.G0360285	0	0	6	0	0	8	0.775	0	0	0.675	0	0	8	0	0	10
PTET.51.1.G0210116	IESPGM.PTET51.1.21.196836	0.0685	0.0357	IESPGM.PTET51.1.36.335358	PTET.51.1.G0360182	0	0	1	0.25	1	3	0.78	0	0	1.11	0	0	11	0	0	3
PTET.51.1.G0210130	IESPGM.PTET51.1.21.217583	0.0133	0.02	IESPGM.PTET51.1.36.309292	PTET.51.1.G0360166	0	0	127	0	0	124	9.93	0	0	158.625	0	0	2896	0	0	2466
PTET.51.1.G0210173	IESPGM.PTET51.1.21.307736	0.0109	0.0128	IESPGM.PTET51.1.36.229317	PTET.51.1.G0360123	0	0	2	0	0	3	1.115	0	0	1.84	0	0	5	0	0	4
PTET.51.1.G0210202	IESPGM.PTET51.1.21.362083	0.0198	0.013	IESPGM.PTET51.1.36.180044	PTET.51.1.G0360099	0	0	1	0	0	0	0.11	0	0	0.11	0	0	1	0	0	4
PTET.51.1.G0210289	IESPGM.PTET51.1.21.521541	0.0125	0.0217	IESPGM.PTET51.1.36.38792	PTET.51.1.G0360019	0	0	207	0	0	185	40.38	0	0	42.32	0	0	248	0	0	223
PTET.51.1.G0020092	IESPGM.PTET51.1.2.177843	0.0235	0.0108	IESPGM.PTET51.1.129.160621	PTET.51.1.G1290096	0	0	27	0	0	13	1.67	0	0	1.755	0	0	12	0	0	11
PTET.51.1.G0220024	IESPGM.PTET51.1.22.34168	0.0112	0.0179	IESPGM.PTET51.1.2.410443	PTET.51.1.G0020221	0	0	0	0	0	0	0.47	0	0	0.635	0	0	0	0	0	1
PTET.51.1.G0220031	IESPGM.PTET51.1.22.43420	0.0141	0.0417	IESPGM.PTET51.1.2.424910	PTET.51.1.G0020226	0	0	39	0	0	38	3.53	0	0.0159	4.695	0	0	48	0	0	50
PTET.51.1.G0220035	IESPGM.PTET51.1.22.53094	0.0145	0.0253	IESPGM.PTET51.1.2.435685	PTET.51.1.G0020233	0	0	14	0	0	16	2.515	0	0	1.455	0	0	32	0	0	19
PTET.51.1.G0220046	IESPGM.PTET51.1.22.70122	0.0119	0.0085	IESPGM.PTET51.1.2.452980	PTET.51.1.G0020244	0	0	53	0	0	55	7.865	0	0	0.12	0	0	3	0	0	4
PTET.51.1.G0220005	IESPGM.PTET51.1.22.7208	0.0303	0.0128	IESPGM.PTET51.1.2.376422	PTET.51.1.G0020199	0	0	1	0	0	7	0.53	0	0.0122	8.135	0	0	39	0	0	47
PTET.51.1.G0230068	IESPGM.PTET51.1.23.102796	0.0097	0.0147	IESPGM.PTET51.1.87.241669	PTET.51.1.G0870138	0	0	2	0	0	1	0.17	0	0	1.53	0	0	14	0	0	11
PTET.51.1.G0230241	IESPGM.PTET51.1.23.409958	0.0137	0.0118	IESPGM.PTET51.1.12.373669	PTET.51.1.G0120224	0	0	15	0	0	15	2.615	0	0	1.15	0	0	10	0	0	9
PTET.51.1.G0240093	IESPGM.PTET51.1.24.174168	0.01	0.011	IESPGM.PTET51.1.62.116606	PTET.51.1.G0620086	0	0	3	0	0	1	0.265	0	0	0.47	0	0	5	0	0	1
PTET.51.1.G0240121	IESPGM.PTET51.1.24.217583	0.011	0.0141	IESPGM.PTET51.1.62.153854	PTET.51.1.G0620110	0	0	3	0	0	1	5.47	0	0	23.02	0	0	2	0	0	0
PTET.51.1.G0240168	IESPGM.PTET51.1.24.305503	0.0112	0.029	IESPGM.PTET51.1.62.230877	PTET.51.1.G0620150	0	0	23	0	0	20	2.045	0	0	1.08	0	0	17	0	0	13
PTET.51.1.G0240185	IESPGM.PTET51.1.24.331621	0.0111	0.0104	IESPGM.PTET51.1.62.255125	PTET.51.1.G0620164	0	0	37	0	0	24	16.935	0	0	17.825	0	0	53	0	0	31
PTET.51.1.G0020233	IESPGM.PTET51.1.2.435043	0.0132	0.0141	IESPGM.PTET51.1.22.52452	PTET.51.1.G0220035	0	0	13	0	0	16	1.455	0	0	2.515	0	0	15	0	0	15
PTET.51.1.G0240023	IESPGM.PTET51.1.24.44262	0.0089	0.0104	IESPGM.PTET51.1.62.38871	PTET.51.1.G0620027	0	0	4	0	0	9	0.61	0	0	0.375	0	0	5	0	0	4
PTET.51.1.G0240284	IESPGM.PTET51.1.24.495978	0.0238	0.0127	IESPGM.PTET51.1.62.397500	PTET.51.1.G0620248	0	0	14	0	0	17	0.76	0	0	2.255	0	0	30	0	0	27
PTET.51.1.G0250041	IESPGM.PTET51.1.25.101632	0.022	0.0274	IESPGM.PTET51.1.15.103800	PTET.51.1.G0150033	0	0	7	0	0	8	1.345	0	0	1.775	0	0	14	0	0	10
PTET.51.1.G0250127	IESPGM.PTET51.1.25.232446	0.0119	0.0333	IESPGM.PTET51.1.15.250366	PTET.51.1.G0150129	0	0	0	0	0	0	0.015	0	0	0.39	0	0	3	0	0	11
PTET.51.1.G0250030	IESPGM.PTET51.1.25.62268	0.02	0.0115	IESPGM.PTET51.1.15.66689	PTET.51.1.G0150027	0	0	5	0	0	3	0.14	0	0	0.24	0	0	14	0	0	6
PTET.51.1.G0020318	IESPGM.PTET51.1.2.563264	0.0141	0.0116	IESPGM.PTET51.1.22.180329	PTET.51.1.G0220123	0	0	2	0	0	1	0.625	0	0.0127	1.655	0	0	7	0	0	4
PTET.51.1.G0250031	IESPGM.PTET51.1.25.76776	0.0244	0.0139	IESPGM.PTET51.1.15.82894	PTET.51.1.G0150028	0	0	0	0	0	0	0.085	0	0	0.085	0	0	0	0	0	0
PTET.51.1.G0260075	IESPGM.PTET51.1.26.131085	0.0101	0.0215	IESPGM.PTET51.1.9.185598	PTET.51.1.G0090101	0.0455	1	21	0	0	27	1.78	0	0.0206	2.85	0	0	35	0	0	24
PTET.51.1.G0020357	IESPGM.PTET51.1.2.623719	0.0127	0.0128	IESPGM.PTET51.1.22.235616	PTET.51.1.G0220159	0	0	16	0	0	10	1.085	0	0	0.55	0	0	6	0	0	5
PTET.51.1.G0260291	IESPGM.PTET51.1.26.464138	0.0119	0.0123	IESPGM.PTET51.1.9.584531	PTET.51.1.G0090344	0	0	31	0	0	11	1.84	0	0.0128	6.7	0	0	49	0	0	37
PTET.51.1.G0260292	IESPGM.PTET51.1.26.465991	0.0093	0.0247	IESPGM.PTET51.1.9.588665	PTET.51.1.G0090349	0	0	8	0	0	3	0.44	0	0	1.18	0	0	20	0	0	13
PTET.51.1.G0260301	IESPGM.PTET51.1.26.486375	0.0233	0.0833	IESPGM.PTET51.1.9.610866	PTET.51.1.G0090360	0	0	10	0	0	14	2.7	0	0	3.68	0	0	24	0	0	15
PTET.51.1.G0260338	IESPGM.PTET51.1.26.530774	0.0238	0.0441	IESPGM.PTET51.1.9.679766	PTET.51.1.G0090397	0	0	10	0	0	15	0.74	0	0	0.65	0	0	15	0	0	6
PTET.51.1.G0270123	IESPGM.PTET51.1.27.205414	0.0247	0.0238	IESPGM.PTET51.1.137.71155	PTET.51.1.G1370043	0	0	75	0.0075	1	132	8.175	0	0	3.78	0	0	38	0	0	38
PTET.51.1.G0270130	IESPGM.PTET51.1.27.218008	0.0137	0.0222	IESPGM.PTET51.1.137.59462	PTET.51.1.G1370036	0	0	74	0	0	75	10.085	0	0	5.935	0	0	50	0	0	60
PTET.51.1.G0270014	IESPGM.PTET51.1.27.31911	0.0299	0.0132	IESPGM.PTET51.1.137.230325	PTET.51.1.G1370140	0	0	73	0	0	55	2.96	0	0	20.48	0	0	127	0	0	211
PTET.51.1.G0270014	IESPGM.PTET51.1.27.32098	0.022	0.0132	IESPGM.PTET51.1.137.230138	PTET.51.1.G1370140	0	0	65	0	0	47	2.96	0	0	20.48	0	0	128	0	0	236
PTET.51.1.G0270183	IESPGM.PTET51.1.27.349273	0.0093	0.0103	IESPGM.PTET51.1.171.134017	PTET.51.1.G1710074	0	0	534	0	0	499	122.445	0	0	71.66	0	0	322	0	0	279
PTET.51.1.G0270193	IESPGM.PTET51.1.27.362556	0.0441	0.0147	IESPGM.PTET51.1.171.121231	PTET.51.1.G1710063	0	0	0	0	0	0	0.085	0	0.0147	1.685	0	0	20	0	0	10
PTET.51.1.G0270225	IESPGM.PTET51.1.27.420887	0.0114	0.0154	IESPGM.PTET51.1.171.58956	PTET.51.1.G1710025	0	0	3	0	0	1	0.3	0	0	0.055	0	0	3	0	0	0
PTET.51.1.G0270050	IESPGM.PTET51.1.27.88208	0.0137	0.0137	IESPGM.PTET51.1.137.179866	PTET.51.1.G1370111	0.0053	2	377	0	0	233	28.85	0	0	26.355	0.0169	6	350	0	0	225
PTET.51.1.G0020476	IESPGM.PTET51.1.2.816281	0.0132	0.0253	IESPGM.PTET51.1.22.439298	PTET.51.1.G0220284	0	0	23	0	0	14	1.95	0	0	1.85	0	0	14	0	0	13
PTET.51.1.G0280131	IESPGM.PTET51.1.28.212005	0.0096	0.0132	IESPGM.PTET51.1.61.248292	PTET.51.1.G0610153	0	0	0	0	0	2	0.225	0	0	0.45	0	0	4	0	0	2
PTET.51.1.G0280131	IESPGM.PTET51.1.28.212171	0.0089	0.0351	IESPGM.PTET51.1.61.248126	PTET.51.1.G0610153	0	0	3	0	0	1	0.225	0	0	0.45	0	0	4	0	0	6
PTET.51.1.G0280153	IESPGM.PTET51.1.28.262139	0.0139	0.0149	IESPGM.PTET51.1.61.206099	PTET.51.1.G0610130	0	0	41	0	0	23	3.72	0	0	7.5	0	0	77	0	0	58
PTET.51.1.G0280166	IESPGM.PTET51.1.28.286362	0.05	0.4706	IESPGM.PTET51.1.61.188706	PTET.51.1.G0610123	0	0	8	0	0	2	0.325	0	0	0.355	0	0	5	0	0	4
PTET.51.1.G0280221	IESPGM.PTET51.1.28.349759	0.0103	0.0182	IESPGM.PTET51.1.61.117337	PTET.51.1.G0610072	0	0	12	0	0	15	1.785	0	0	1.015	0	0	2	0	0	6
PTET.51.1.G0280263	IESPGM.PTET51.1.28.426814	0.0095	0.0092	IESPGM.PTET51.1.61.51054	PTET.51.1.G0610026	0	0	29	0	0	32	5.35	0	0	3.025	0	0	17	0	0	21
PTET.51.1.G0280275	IESPGM.PTET51.1.28.490896	0.0135	0.0119	IESPGM.PTET51.1.61.25921	PTET.51.1.G0610019	0	0	124	0	0	84	34.91	0	0.0137	18.975	0	0	40	0	0	32
PTET.51.1.G0290080	IESPGM.PTET51.1.29.147884	0.1757	0.6381	IESPGM.PTET51.1.41.109223	PTET.51.1.G0410061	0	0	1	0	0	0	0.085	0	0	0.13	0	0	0	0	0	1
PTET.51.1.G0290170	IESPGM.PTET51.1.29.290145	0.0127	0.0132	IESPGM.PTET51.1.41.246059	PTET.51.1.G0410147	0	0	203	0	0	289	19.92	0	0	13.26	0	0	100	0	0	112
PTET.51.1.G0020547	IESPGM.PTET51.1.2.934909	0.011	0.023	IESPGM.PTET51.1.22.552460	PTET.51.1.G0220358	0	0	201	0	0	281	40.74	0	0.0175	84.195	0.0071	5	701	0.0121	6	488
PTET.51.1.G0290267	IESPGM.PTET51.1.29.454186	0.0227	0.0241	IESPGM.PTET51.1.41.376785	PTET.51.1.G0410232	0	0	27	0	0	36	2.565	0	0	1.85	0	0	18	0.0556	1	17
PTET.51.1.G0300095	IESPGM.PTET51.1.30.138152	0.0137	0.0213	IESPGM.PTET51.1.31.321287	PTET.51.1.G0310175	0	0	8	0	0	16	4.175	0	0	1.9	0	0	2	0	0	4
PTET.51.1.G0300108	IESPGM.PTET51.1.30.159609	0.0274	0.0333	IESPGM.PTET51.1.31.305567	PTET.51.1.G0310165	0	0	11	0	0	17	1.35	0	0	1.45	0	0	5	0	0	11
PTET.51.1.G0310208	IESPGM.PTET51.1.31.374983	0.0303	0.0241	IESPGM.PTET51.1.30.105566	PTET.51.1.G0300066	0	0	69	0	0	76	7.565	0	0	2.52	0	0	21	0	0	34
PTET.51.1.G0310209	IESPGM.PTET51.1.31.377063	0.0127	0.0169	IESPGM.PTET51.1.30.103471	PTET.51.1.G0300065	0	0	4	0	0	3	0.135	0	0	0.155	0	0	6	0	0	3
PTET.51.1.G0310219	IESPGM.PTET51.1.31.390087	0.0133	0.0149	IESPGM.PTET51.1.30.90286	PTET.51.1.G0300054	0	0	8	0	0	3	0.68	0	0	0.365	0	0	1	0	0	4
PTET.51.1.G0310240	IESPGM.PTET51.1.31.422492	0.01	0.0172	IESPGM.PTET51.1.30.65936	PTET.51.1.G0300042	0	0	56	0	0	45	6.365	0	0	5.46	0	0	25	0	0	31
PTET.51.1.G0310028	IESPGM.PTET51.1.31.55534	0.0423	0.4167	IESPGM.PTET51.1.30.392526	PTET.51.1.G0300238	0	0	1	0	0	0	0.28	0	0.0164	0.355	0	0	1	0	0	2
PTET.51.1.G0320072	IESPGM.PTET51.1.32.126917	0.0455	0.0167	IESPGM.PTET51.1.95.194337	PTET.51.1.G0950113	0	0	2	0	0	0	0.285	0	0	2.855	0	0	24	0	0	20
PTET.51.1.G0320050	IESPGM.PTET51.1.32.92090	0.0141	0.0253	IESPGM.PTET51.1.95.236555	PTET.51.1.G0950143	0	0	6	0	0	3	1.025	0	0	1.795	0	0	16	0	0	11
PTET.51.1.G0330090	IESPGM.PTET51.1.33.142507	0.0299	0.0145	IESPGM.PTET51.1.45.127844	PTET.51.1.G0450087	0	0	13	0	0	12	1.5	0	0	2.245	0	0	27	0	0	16
PTET.51.1.G0030244	IESPGM.PTET51.1.3.383751	0.0116	0.0222	IESPGM.PTET51.1.6.404796	PTET.51.1.G0060238	0	0	4	0	0	2	3.37	0	0	4.6	0	0	5	0	0	7
PTET.51.1.G0340056	IESPGM.PTET51.1.34.100765	0.0094	0.012	IESPGM.PTET51.1.48.435591	PTET.51.1.G0480245	0	0	122	0	0	48	5.515	0	0	9.14	0	0	75	0	0	75
PTET.51.1.G0340137	IESPGM.PTET51.1.34.223461	0.0127	0.013	IESPGM.PTET51.1.48.263014	PTET.51.1.G0480156	0	0	12	0	0	14	2.585	0	0	1.15	0	0	3	0	0	6
PTET.51.1.G0340165	IESPGM.PTET51.1.34.266504	0.0286	0.0225	IESPGM.PTET51.1.48.228720	PTET.51.1.G0480129	0	0	3	0	0	7	0.81	0	0	3.395	0	0	28	0	0	12
PTET.51.1.G0340016	IESPGM.PTET51.1.34.32813	0.0198	0.0172	IESPGM.PTET51.1.48.383540	PTET.51.1.G0480214	0	0	0	0	0	0	0.06	0	0	0.465	0	0	6	0	0	4
PTET.51.1.G0340204	IESPGM.PTET51.1.34.347859	0.0225	0.0164	IESPGM.PTET51.1.48.168737	PTET.51.1.G0480091	0	0	571	0	0	853	62.355	0	0	64.52	0	0	531	0	0	860
PTET.51.1.G0340245	IESPGM.PTET51.1.34.412799	0.03	0.0092	IESPGM.PTET51.1.48.109449	PTET.51.1.G0480047	0	0	0	0	0	0	0.36	0	0	0.625	0	0	0	0	0	1
PTET.51.1.G0340245	IESPGM.PTET51.1.34.415719	0.0094	0.0092	IESPGM.PTET51.1.48.106022	PTET.51.1.G0480047	0	0	0	0	0	0	0.36	0	0	0.625	0	0	0	0	0	0
PTET.51.1.G0340254	IESPGM.PTET51.1.34.438771	0.0128	0.0128	IESPGM.PTET51.1.48.80893	PTET.51.1.G0480041	0	0	17	0	0	14	2.165	0	0	1.04	0	0	4	0	0	8
PTET.51.1.G0350095	IESPGM.PTET51.1.35.170197	0.0297	0.0794	IESPGM.PTET51.1.37.330079	PTET.51.1.G0370202	0	0	0	0	0	0	0.065	0	0	0.3	0	0	1	0	0	2
PTET.51.1.G0350103	IESPGM.PTET51.1.35.183663	0.0098	0.0106	IESPGM.PTET51.1.37.309774	PTET.51.1.G0370194	0	0	2	0	0	2	0.23	0	0.0192	0.545	0	0	6	0	0	2
PTET.51.1.G0350120	IESPGM.PTET51.1.35.208052	0.037	0.0517	IESPGM.PTET51.1.37.288169	PTET.51.1.G0370180	0	0	1	0	0	6	0.315	0	0	0.465	0	0	5	0	0	9
PTET.51.1.G0350153	IESPGM.PTET51.1.35.248623	0.0122	0.0159	IESPGM.PTET51.1.37.241449	PTET.51.1.G0370151	0	0	849	0	0	944	75.63	0	0	189.69	0	0	2029	0	0	2049
PTET.51.1.G0350021	IESPGM.PTET51.1.35.29406	0.0118	0.0816	IESPGM.PTET51.1.37.458945	PTET.51.1.G0370278	0	0	36	0	0	23	2.23	0	0	4.265	0	0	58	0	0	67
PTET.51.1.G0350003	IESPGM.PTET51.1.35.5696	0.0135	0.0132	IESPGM.PTET51.1.37.488263	PTET.51.1.G0370295	0	0	7	0	0	2	0.9	0	0	0.885	0	0	14	0	0	15
PTET.51.1.G0350004	IESPGM.PTET51.1.35.6276	0.0455	0.0185	IESPGM.PTET51.1.37.487700	PTET.51.1.G0370294	0	0	9	0	0	25	48.305	0	0	165.53	0	0	46	0	0	88
PTET.51.1.G0350055	IESPGM.PTET51.1.35.85680	0.0128	0.0143	IESPGM.PTET51.1.37.401966	PTET.51.1.G0370241	0	0	3	0	0	2	0.62	0	0.0111	0.425	0	0	5	0	0	1
PTET.51.1.G0360153	IESPGM.PTET51.1.36.288205	0.0114	0.0127	IESPGM.PTET51.1.21.235389	PTET.51.1.G0210140	0	0	1	0	0	0	64.685	0	0.0267	2.995	0	0	0	0	0	1
PTET.51.1.G0360195	IESPGM.PTET51.1.36.355230	0.0286	0.0889	IESPGM.PTET51.1.21.173477	PTET.51.1.G0210099	0	0	12	0	0	3	1.025	0	0	0.38	0	0	2	0	0	4
PTET.51.1.G0030419	IESPGM.PTET51.1.3.704173	0.0116	0.0169	IESPGM.PTET51.1.6.116988	PTET.51.1.G0060081	0	0	1	0	0	0	0.1	0	0	0.585	0	0	1	0	0	0
PTET.51.1.G0370109	IESPGM.PTET51.1.37.168624	0.013	0.0282	IESPGM.PTET51.1.35.314472	PTET.51.1.G0350197	0	0	2	0	0	7	0.38	0	0	2.645	0	0	36	0	0	25
PTET.51.1.G0370117	IESPGM.PTET51.1.37.180025	0.023	0.0128	IESPGM.PTET51.1.35.302014	PTET.51.1.G0350186	0	0	13	0	0	11	0.71	0	0	0.36	0	0	6	0	0	1
PTET.51.1.G0370191	IESPGM.PTET51.1.37.301907	0.0215	0.026	IESPGM.PTET51.1.35.194097	PTET.51.1.G0350111	0	0	8	0	0	5	0.72	0	0	2.27	0	0	27	0	0	19
PTET.51.1.G0370270	IESPGM.PTET51.1.37.445319	0.0079	0.0104	IESPGM.PTET51.1.35.43984	PTET.51.1.G0350028	0	0	3	0	0	2	0.395	0	0	0.675	0	0	1	0	0	3
PTET.51.1.G0370288	IESPGM.PTET51.1.37.476887	0.0106	0.0105	IESPGM.PTET51.1.35.15569	PTET.51.1.G0350011	0	0	12	0	0	17	1.585	0	0	8.87	0	0	70	0	0	107
PTET.51.1.G0380076	IESPGM.PTET51.1.38.122615	0.012	0.0185	IESPGM.PTET51.1.50.85336	PTET.51.1.G0500060	0	0	0	0	0	0	0.465	0	0	0.41	0	0	0	0	0	1
PTET.51.1.G0380111	IESPGM.PTET51.1.38.182088	0.0274	0.02	IESPGM.PTET51.1.50.144377	PTET.51.1.G0500091	0	0	24	0	0	12	2.56	0	0.0143	0.73	0	0	5	0	0	5
PTET.51.1.G0030517	IESPGM.PTET51.1.3.856966	0.026	0.012	IESPGM.PTET51.1.6.6432	PTET.51.1.G0060003	0	0	244	0	0	318	23.58	0	0.013	12.84	0	0	56	0	0	75
PTET.51.1.G0390065	IESPGM.PTET51.1.39.109101	0.0114	0.0449	IESPGM.PTET51.1.56.326487	PTET.51.1.G0560193	0	0	0	0	0	2	0.06	0	0	1.205	0	0	8	0	0	15
PTET.51.1.G0390005	IESPGM.PTET51.1.39.11263	0.0103	0.0143	IESPGM.PTET51.1.56.408893	PTET.51.1.G0560252	0	0	2	0	0	1	0.23	0	0	0.38	0	0	6	0	0	6
PTET.51.1.G0390091	IESPGM.PTET51.1.39.142954	0.0375	0.0106	IESPGM.PTET51.1.184.60761	PTET.51.1.G1840039	0	0	8	0	0	57	1.555	0	0	0.61	0	0	5	0	0	20
PTET.51.1.G0390101	IESPGM.PTET51.1.39.159094	0.0357	0.0385	IESPGM.PTET51.1.184.33250	PTET.51.1.G1840026	0	0	185	0	0	116	15.595	0	0	21.885	0	0	200	0	0	179
PTET.51.1.G0390115	IESPGM.PTET51.1.39.180226	0.0116	0.0217	IESPGM.PTET51.1.184.15487	PTET.51.1.G1840015	0	0	18	0	0	8	3.985	0	0	3.875	0	0	3	0	0	3
PTET.51.1.G0390119	IESPGM.PTET51.1.39.184674	0.0133	0.04	IESPGM.PTET51.1.184.11520	PTET.51.1.G1840011	0.0185	1	53	0.0164	1	60	4.51	0	0	15.12	0	0	168	0	0	112
PTET.51.1.G0390148	IESPGM.PTET51.1.39.261104	0.0093	0.0141	IESPGM.PTET51.1.135.30571	PTET.51.1.G1350012	0	0	3	0	0	4	0.46	0	0	0.2	0	0	4	0	0	1
PTET.51.1.G0390199	IESPGM.PTET51.1.39.370910	0.0353	0.0411	IESPGM.PTET51.1.135.139307	PTET.51.1.G1350062	0	0	1	0	0	0	0.055	0	0	0.335	0	0	13	0	0	7
PTET.51.1.G0390031	IESPGM.PTET51.1.39.58413	0.027	0.0278	IESPGM.PTET51.1.56.374675	PTET.51.1.G0560231	0	0	3	0	0	1	0.39	0	0.0116	0.125	0	0	2	0	0	1
PTET.51.1.G0390031	IESPGM.PTET51.1.39.58964	0.0312	0.0141	IESPGM.PTET51.1.56.374127	PTET.51.1.G0560231	0	0	4	0	0	4	0.39	0	0	0.125	0	0	2	0	0	1
PTET.51.1.G0390037	IESPGM.PTET51.1.39.68236	0.0222	0.0678	IESPGM.PTET51.1.56.366076	PTET.51.1.G0560224	0	0	7	0.1667	3	15	1.835	0	0	1.65	0	0	13	0	0	15
PTET.51.1.G0400132	IESPGM.PTET51.1.40.215048	0.011	0.0161	IESPGM.PTET51.1.102.171869	PTET.51.1.G1020116	0	0	2	0	0	0	0.105	0	0	0.185	0	0	1	0	0	3
PTET.51.1.G0400143	IESPGM.PTET51.1.40.230702	0.0308	0.0141	IESPGM.PTET51.1.102.195026	PTET.51.1.G1020130	0	0	41	0	0	26	2.795	0	0	1.28	0	0	11	0	0	2
PTET.51.1.G0400019	IESPGM.PTET51.1.40.30669	0.0101	0.019	IESPGM.PTET51.1.102.30307	PTET.51.1.G1020022	0	0	1645	0	0	1551	174.53	0	0	162.74	0	0	1988	0	0	1914
PTET.51.1.G0400193	IESPGM.PTET51.1.40.308802	0.0106	0.0154	IESPGM.PTET51.1.102.266028	PTET.51.1.G1020178	0	0	4	0	0	5	0.405	0	0	0.205	0	0	1	0	0	0
PTET.51.1.G0400210	IESPGM.PTET51.1.40.346279	0.0123	0.0337	IESPGM.PTET51.1.166.185462	PTET.51.1.G1660103	0	0	30	0	0	47	1.96	0	0	0.575	0	0	13	0	0	14
PTET.51.1.G0400214	IESPGM.PTET51.1.40.352459	0.013	0.0568	IESPGM.PTET51.1.166.178547	PTET.51.1.G1660101	0	0	3	0	0	4	1.575	0	0	1.89	0	0	1	0	0	2
PTET.51.1.G0400241	IESPGM.PTET51.1.40.405181	0.0108	0.0116	IESPGM.PTET51.1.166.106407	PTET.51.1.G1660069	0	0	577	0	0	738	184.26	0	0	325.86	0	0	1554	0	0	1637
PTET.51.1.G0410059	IESPGM.PTET51.1.41.107470	0.0135	0.0119	IESPGM.PTET51.1.29.146123	PTET.51.1.G0290078	0	0	1	0	0	4	0.395	0	0.0303	0.735	0	0	7	0	0	6
PTET.51.1.G0410061	IESPGM.PTET51.1.41.108873	0.0163	0.0706	IESPGM.PTET51.1.29.147535	PTET.51.1.G0290080	0	0	4	0	0	0	0.13	0	0	0.085	0	0	3	0	0	4
PTET.51.1.G0410101	IESPGM.PTET51.1.41.185945	0.0109	0.0141	IESPGM.PTET51.1.29.210503	PTET.51.1.G0290118	0	0	6	0	0	5	14.4	0	0	1.525	0	0	3	0	0	0
PTET.51.1.G0410101	IESPGM.PTET51.1.41.187538	0.0122	0.0128	IESPGM.PTET51.1.29.212082	PTET.51.1.G0290118	0	0	83	0	0	62	14.4	0	0	1.525	0	0	1	0	0	8
PTET.51.1.G0410101	IESPGM.PTET51.1.41.188016	0.0263	0.0256	IESPGM.PTET51.1.29.212559	PTET.51.1.G0290118	0	0	131	0	0	94	14.4	0	0	1.525	0	0	7	0	0	11
PTET.51.1.G0420116	IESPGM.PTET51.1.42.177658	0.026	0.0196	IESPGM.PTET51.1.14.439974	PTET.51.1.G0140255	0	0	29	0	0	13	1.2	0	0	0.255	0	0	1	0	0	5
PTET.51.1.G0420137	IESPGM.PTET51.1.42.206772	0.0137	0.0317	IESPGM.PTET51.1.14.401489	PTET.51.1.G0140230	0	0	10	0	0	7	1.875	0	0	1.48	0	0	19	0	0	16
PTET.51.1.G0420191	IESPGM.PTET51.1.42.289710	0.0114	0.0116	IESPGM.PTET51.1.14.273638	PTET.51.1.G0140164	0	0	56	0	0	66	12.255	0	0	10.815	0	0	28	0	0	44
PTET.51.1.G0420213	IESPGM.PTET51.1.42.327405	0.0156	0.0108	IESPGM.PTET51.1.14.236747	PTET.51.1.G0140141	0	0	197	0	0	187	31.26	0	0	20.575	0	0	108	0	0	99
PTET.51.1.G0420241	IESPGM.PTET51.1.42.371502	0.019	0.0125	IESPGM.PTET51.1.14.174641	PTET.51.1.G0140109	0	0	0	0	0	1	0.295	0	0	0.42	0	0	1	0	0	3
PTET.51.1.G0420274	IESPGM.PTET51.1.42.428036	0.0385	0.0116	IESPGM.PTET51.1.14.111537	PTET.51.1.G0140072	0	0	5	0	0	8	1.63	0	0.0208	2.275	0	0	9	0	0	8
PTET.51.1.G0420274	IESPGM.PTET51.1.42.428485	0.0353	0.0135	IESPGM.PTET51.1.14.111088	PTET.51.1.G0140072	0	0	17	0	0	17	1.63	0	0.0114	2.275	0	0	29	0	0	22
PTET.51.1.G0430150	IESPGM.PTET51.1.43.257626	0.0137	0.0127	IESPGM.PTET51.1.125.69151	PTET.51.1.G1250042	0	0	478	0.0023	1	430	34.18	0	0	4.52	0	0	83	0	0	67
PTET.51.1.G0430156	IESPGM.PTET51.1.43.265029	0.0109	0.012	IESPGM.PTET51.1.125.76441	PTET.51.1.G1250049	0	0	11	0	0	6	1.37	0	0	2.405	0	0	13	0	0	14
PTET.51.1.G0430257	IESPGM.PTET51.1.43.403263	0.0111	0.0286	IESPGM.PTET51.1.125.202617	PTET.51.1.G1250144	0	0	0	0	0	0	1.515	0	0.0125	2.12	0	0	3	0	0	1
PTET.51.1.G0430265	IESPGM.PTET51.1.43.416213	0.0159	0.0154	IESPGM.PTET51.1.125.216160	PTET.51.1.G1250153	0	0	46	0	0	40	4.28	0	0	5.205	0	0	34	0	0	53
PTET.51.1.G0440102	IESPGM.PTET51.1.44.162868	0.0267	0.0103	IESPGM.PTET51.1.18.410138	PTET.51.1.G0180223	0	0	34	0	0	28	0.78	0	0	0.31	0	0	8	0	0	7
PTET.51.1.G0440102	IESPGM.PTET51.1.44.167359	0.019	0.0086	IESPGM.PTET51.1.18.405644	PTET.51.1.G0180223	0	0	4	0	0	1	0.78	0	0	0.31	0	0	0	0	0	2
PTET.51.1.G0440102	IESPGM.PTET51.1.44.167986	0.012	0.009	IESPGM.PTET51.1.18.405017	PTET.51.1.G0180223	0	0	3	0	0	1	0.78	0	0	0.31	0	0	0	0	0	3
PTET.51.1.G0440107	IESPGM.PTET51.1.44.184016	0.0137	0.0139	IESPGM.PTET51.1.18.383236	PTET.51.1.G0180213	0	0	8	0	0	5	0.825	0	0	0.52	0	0	8	0	0	15
PTET.51.1.G0440141	IESPGM.PTET51.1.44.249392	0.0118	0.0122	IESPGM.PTET51.1.18.318521	PTET.51.1.G0180180	0	0	4	0	0	4	0.23	0	0	0.27	0	0	2	0	0	2
PTET.51.1.G0440260	IESPGM.PTET51.1.44.455941	0.0127	0.0161	IESPGM.PTET51.1.18.78672	PTET.51.1.G0180031	0	0	17	0	0	4	1.145	0	0	0.67	0	0	5	0	0	3
PTET.51.1.G0040263	IESPGM.PTET51.1.4.478932	0.0267	0.012	IESPGM.PTET51.1.53.341435	PTET.51.1.G0530214	0	0	2	0	0	2	0.19	0	0	1.02	0	0	13	0	0	8
PTET.51.1.G0450009	IESPGM.PTET51.1.45.20841	0.8	0.6988	IESPGM.PTET51.1.33.31575	PTET.51.1.G0330013	0	0	1	0	0	0	0.055	0	0	0.83	0	0	9	0	0	3
PTET.51.1.G0450175	IESPGM.PTET51.1.45.249508	0.0137	0.0114	IESPGM.PTET51.1.33.271887	PTET.51.1.G0330180	0	0	19	0	0	6	0.37	0	0	0.2	0	0	4	0	0	2
PTET.51.1.G0450292	IESPGM.PTET51.1.45.422711	0.0114	0.0145	IESPGM.PTET51.1.33.464052	PTET.51.1.G0330315	0	0	3	0	0	10	0.425	0	0	0.465	0	0	4	0	0	5
PTET.51.1.G0040310	IESPGM.PTET51.1.4.566901	0.011	0.0116	IESPGM.PTET51.1.53.278362	PTET.51.1.G0530171	0	0	183	0	0	189	39.315	0	0	35.92	0	0	163	0	0	205
PTET.51.1.G0450064	IESPGM.PTET51.1.45.98120	0.0161	0.0108	IESPGM.PTET51.1.33.109575	PTET.51.1.G0330067	0	0	8	0	0	5	0.685	0	0	8.075	0	0	55	0	0	69
PTET.51.1.G0040335	IESPGM.PTET51.1.4.602216	0.0106	0.0135	IESPGM.PTET51.1.53.241049	PTET.51.1.G0530145	0	0	8	0	0	17	2.89	0	0	3.04	0	0	25	0	0	35
PTET.51.1.G0460107	IESPGM.PTET51.1.46.165510	0.0152	0.0208	IESPGM.PTET51.1.101.180526	PTET.51.1.G1010113	0	0	1	0	0	4	0.48	0	0	0.655	0	0	5	0	0	1
PTET.51.1.G0470063	IESPGM.PTET51.1.47.131173	0.0105	0.0192	IESPGM.PTET51.1.83.152536	PTET.51.1.G0830072	0	0	0	0	0	1	0.275	0	0.0108	0.47	0	0	0	0	0	3
PTET.51.1.G0470068	IESPGM.PTET51.1.47.150053	0.0132	0.0108	IESPGM.PTET51.1.83.113059	PTET.51.1.G0830059	0	0	19	0	0	24	2.08	0	0	1.725	0	0	8	0	0	7
PTET.51.1.G0470146	IESPGM.PTET51.1.47.284836	0.0122	0.0122	IESPGM.PTET51.1.143.45784	PTET.51.1.G1430033	0	0	3804	0	0	4184	957.075	0	0	845.215	0	0	3122	0	0	3503
PTET.51.1.G0470151	IESPGM.PTET51.1.47.301178	0.0084	0.0106	IESPGM.PTET51.1.143.64766	PTET.51.1.G1430040	0	0	780	0	0	798	114.815	0	0.0206	81.025	0	0	598	0	0	573
PTET.51.1.G0470156	IESPGM.PTET51.1.47.316956	0.0106	0.0241	IESPGM.PTET51.1.143.70264	PTET.51.1.G1430043	0	0	16	0	0	15	3.065	0	0	0.325	0	0	1	0	0	0
PTET.51.1.G0470164	IESPGM.PTET51.1.47.325068	0.0118	0.0125	IESPGM.PTET51.1.143.78487	PTET.51.1.G1430052	0	0	5	0	0	18	0.715	0	0	10.08	0	0	148	0	0	203
PTET.51.1.G0470028	IESPGM.PTET51.1.47.50758	0.0137	0.0135	IESPGM.PTET51.1.83.35009	PTET.51.1.G0830021	0	0	14	0	0	20	1.26	0	0.0213	12.705	0	0	97	0	0	60
PTET.51.1.G0040434	IESPGM.PTET51.1.4.786871	0.0122	0.0123	IESPGM.PTET51.1.53.130818	PTET.51.1.G0530076	0	0	266	0	0	322	36.92	0	0	32.335	0	0	229	0	0	259
PTET.51.1.G0480047	IESPGM.PTET51.1.48.108019	0.0141	0.0152	IESPGM.PTET51.1.34.413924	PTET.51.1.G0340245	0	0	1	0	0	1	0.625	0	0	0.36	0	0	0	0	0	0
PTET.51.1.G0480136	IESPGM.PTET51.1.48.236560	0.0095	0.0114	IESPGM.PTET51.1.34.257949	PTET.51.1.G0340159	0	0	12	0	0	10	1.45	0	0	5.595	0	0	49	0	0	55
PTET.51.1.G0480142	IESPGM.PTET51.1.48.241860	0.011	0.0361	IESPGM.PTET51.1.34.245197	PTET.51.1.G0340153	0	0	4	0	0	2	0.2	0	0.0175	0.24	0	0	1	0	0	2
PTET.51.1.G0480148	IESPGM.PTET51.1.48.248971	0.0326	0.0137	IESPGM.PTET51.1.34.237484	PTET.51.1.G0340146	0	0	6	0	0	8	0.775	0	0	0.67	0	0	8	0	0	5
PTET.51.1.G0480253	IESPGM.PTET51.1.48.443357	0.0215	0.0625	IESPGM.PTET51.1.34.106861	PTET.51.1.G0340062	0	0	40	0	0	89	17.26	0	0	8.275	0	0	23	0	0	40
PTET.51.1.G0480256	IESPGM.PTET51.1.48.446915	0.0282	0.0114	IESPGM.PTET51.1.34.110384	PTET.51.1.G0340065	0	0	18	0	0	6	1.195	0	0	3.27	0	0	34	0	0	15
PTET.51.1.G0480261	IESPGM.PTET51.1.48.452945	0.0122	0.0104	IESPGM.PTET51.1.34.114527	PTET.51.1.G0340069	0	0	333	0	0	394	49.455	0	0	57.36	0	0	780	0	0	804
PTET.51.1.G0490117	IESPGM.PTET51.1.49.186363	0.0597	0.1538	IESPGM.PTET51.1.17.303730	PTET.51.1.G0170173	0	0	0	0	0	2	0.1	0	0.0132	1.32	0	0	16	0	0	15
PTET.51.1.G0490138	IESPGM.PTET51.1.49.243710	0.0192	0.026	IESPGM.PTET51.1.17.248465	PTET.51.1.G0170150	0	0	23	0	0	36	3.285	0	0	7.74	0	0	60	0	0	72
PTET.51.1.G0500116	IESPGM.PTET51.1.50.185046	0.022	0.0385	IESPGM.PTET51.1.38.230538	PTET.51.1.G0380135	0	0	25	0	0	42	2.395	0	0	7.58	0	0	82	0	0	63
PTET.51.1.G0500131	IESPGM.PTET51.1.50.205466	0.0105	0.0101	IESPGM.PTET51.1.38.252996	PTET.51.1.G0380150	0	0	48	0	0	83	9.33	0	0	0.565	0	0	1	0	0	5
PTET.51.1.G0500018	IESPGM.PTET51.1.50.26347	0.0123	0.0238	IESPGM.PTET51.1.38.48864	PTET.51.1.G0380035	1	2	0	0	0	3	0.1	0	0	3.37	0	0	17	0	0	8
PTET.51.1.G0510092	IESPGM.PTET51.1.51.182784	0.0105	0.0278	IESPGM.PTET51.1.150.108603	PTET.51.1.G1500056	0	0	258	0	0	280	19.685	0	0	0.75	0	0	7	0	0	14
PTET.51.1.G0510094	IESPGM.PTET51.1.51.185888	0.0114	0.0099	IESPGM.PTET51.1.150.105499	PTET.51.1.G1500054	0	0	10	0	0	10	1.02	0	0	2.385	0	0	16	0	0	18
PTET.51.1.G0510109	IESPGM.PTET51.1.51.213538	0.0132	0.0122	IESPGM.PTET51.1.150.83162	PTET.51.1.G1500041	0	0	19	0	0	8	1.105	0	0	3.45	0	0	19	0	0	14
PTET.51.1.G0510162	IESPGM.PTET51.1.51.336123	0.0104	0.0087	IESPGM.PTET51.1.57.136890	PTET.51.1.G0570070	0	0	8	0	0	7	0.535	0	0.0097	0.16	0	0	3	0	0	3
PTET.51.1.G0510162	IESPGM.PTET51.1.51.341432	0.0143	0.011	IESPGM.PTET51.1.57.142211	PTET.51.1.G0570070	0	0	1	0	0	0	0.535	0	0	0.16	0	0	1	0	0	0
PTET.51.1.G0520171	IESPGM.PTET51.1.52.278210	0.0135	0.0118	IESPGM.PTET51.1.60.196896	PTET.51.1.G0600106	0	0	1	0	0	0	0.7	0	0	1.53	0	0	6	0	0	10
PTET.51.1.G0520248	IESPGM.PTET51.1.52.384005	0.0139	0.0139	IESPGM.PTET51.1.60.89354	PTET.51.1.G0600045	0	0	157	0	0	142	20.255	0	0	3.185	0	0	17	0	0	18
PTET.51.1.G0520248	IESPGM.PTET51.1.52.384020	0.0145	0.0145	IESPGM.PTET51.1.60.89339	PTET.51.1.G0600045	0	0	182	0	0	170	20.255	0	0	3.185	0	0	19	0	0	18
PTET.51.1.G0520040	IESPGM.PTET51.1.52.54953	0.0098	0.0132	IESPGM.PTET51.1.60.409293	PTET.51.1.G0600236	0	0	27	0	0	40	4.105	0	0	1.415	0	0	12	0	0	16
PTET.51.1.G0520065	IESPGM.PTET51.1.52.91059	0.0235	0.0118	IESPGM.PTET51.1.60.362444	PTET.51.1.G0600206	0	0	8	0	0	6	1.23	0	0.0167	0.605	0	0	3	0	0	1
PTET.51.1.G0530077	IESPGM.PTET51.1.53.132617	0.0149	0.0109	IESPGM.PTET51.1.4.785073	PTET.51.1.G0040433	0	0	65	0	0	99	5.195	0	0	11.865	0	0	205	0	0	231
PTET.51.1.G0530119	IESPGM.PTET51.1.53.194002	0.0128	0.0161	IESPGM.PTET51.1.4.683519	PTET.51.1.G0040373	0	0	2	0	0	0	0.07	0	0	3.075	0	0	25	0	0	33
PTET.51.1.G0530119	IESPGM.PTET51.1.53.194026	0.0106	0.026	IESPGM.PTET51.1.4.683495	PTET.51.1.G0040373	0	0	2	0	0	0	0.07	0	0	3.075	0	0	28	0	0	33
PTET.51.1.G0530031	IESPGM.PTET51.1.53.53528	0.0095	0.0135	IESPGM.PTET51.1.180.62311	PTET.51.1.G1800035	0	0	576	0	0	565	119.145	0	0	98.48	0	0	511	0	0	493
PTET.51.1.G0540112	IESPGM.PTET51.1.54.199693	0.0147	0.0185	IESPGM.PTET51.1.72.176410	PTET.51.1.G0720099	0	0	5	0	0	12	1.075	0	0	1.37	0	0	9	0	0	3
PTET.51.1.G0540213	IESPGM.PTET51.1.54.367333	0.011	0.0111	IESPGM.PTET51.1.72.321892	PTET.51.1.G0720182	0	0	228	0	0	196	50.675	0	0	59.72	0	0	425	0	0	259
PTET.51.1.G0540047	IESPGM.PTET51.1.54.72934	0.0122	0.0179	IESPGM.PTET51.1.72.80802	PTET.51.1.G0720043	0	0	36	0	0	30	4.7	0	0	3.11	0	0	31	0	0	40
PTET.51.1.G0550083	IESPGM.PTET51.1.55.115421	0.0096	0.0244	IESPGM.PTET51.1.160.29268	PTET.51.1.G1600021	0	0	9	0	0	4	1.255	0	0.013	1.555	0	0	11	0	0	10
PTET.51.1.G0550127	IESPGM.PTET51.1.55.207205	0.0217	0.0123	IESPGM.PTET51.1.108.51684	PTET.51.1.G1080035	0	0	14	0	0	5	1.35	0	0	1.425	0	0	23	0	0	11
PTET.51.1.G0550156	IESPGM.PTET51.1.55.257898	0.0597	0.0154	IESPGM.PTET51.1.108.95894	PTET.51.1.G1080065	0	0	2	0	0	0	0.04	0	0	0.37	0	0	0	0	0	4
PTET.51.1.G5560048	IESPGM.PTET51.1.556.84195	0.0128	0.033	IESPGM.PTET51.1.169.108129	PTET.51.1.G1690048	0	0	9	0	0	21	1.36	0	0.0135	0.6	0	0	12	0	0	11
PTET.51.1.G0050381	IESPGM.PTET51.1.5.610074	0.0125	0.0164	IESPGM.PTET51.1.16.499410	PTET.51.1.G0160313	0	0	5	0	0	4	0.505	0	0	0.415	0	0	9	0	0	9
PTET.51.1.G0560107	IESPGM.PTET51.1.56.162655	0.0299	0.0132	IESPGM.PTET51.1.58.147047	PTET.51.1.G0580078	0	0	13	0	0	32	2.97	0	0	0.865	0	0	2	0	0	11
PTET.51.1.G0570067	IESPGM.PTET51.1.57.129131	0.0127	0.009	IESPGM.PTET51.1.51.328283	PTET.51.1.G0510159	0	0	32	0	0	39	4.31	0	0	7.27	0	0	62	0	0	74
PTET.51.1.G0570111	IESPGM.PTET51.1.57.205927	0.0119	0.0099	IESPGM.PTET51.1.99.33416	PTET.51.1.G0990022	0	0	50	0	0	60	4.155	0	0	5.09	0	0	33	0	0	32
PTET.51.1.G0570155	IESPGM.PTET51.1.57.278370	0.0125	0.0143	IESPGM.PTET51.1.99.111366	PTET.51.1.G0990070	0	0	14	0	0	11	1.85	0	0	1.785	0	0	23	0	0	13
PTET.51.1.G0570158	IESPGM.PTET51.1.57.283839	0.0217	0.0667	IESPGM.PTET51.1.99.117155	PTET.51.1.G0990074	0.0256	2	76	0	0	115	0.695	0	0	139.41	0	0	401	0	0	389
PTET.51.1.G0570047	IESPGM.PTET51.1.57.92237	0.0116	0.0127	IESPGM.PTET51.1.51.365059	PTET.51.1.G0510176	0	0	144	0	0	132	17.38	0	0	8.62	0	0	71	0	0	90
PTET.51.1.G0580056	IESPGM.PTET51.1.58.107442	0.0132	0.0123	IESPGM.PTET51.1.56.135410	PTET.51.1.G0560086	0	0	9	0	0	9	2.18	0	0	1	0	0	6	0	0	4
PTET.51.1.G0580114	IESPGM.PTET51.1.58.203283	0.0123	0.013	IESPGM.PTET51.1.56.212208	PTET.51.1.G0560139	0	0	21	0	0	18	2.215	0	0	4.615	0	0	27	0	0	35
PTET.51.1.G0580249	IESPGM.PTET51.1.58.439803	0.0095	0.0182	IESPGM.PTET51.1.83.352033	PTET.51.1.G0830188	0	0	3	0	0	2	0.46	0	0	0.1	0	0	0	0	0	0
PTET.51.1.G0590086	IESPGM.PTET51.1.59.123087	0.0119	0.0217	IESPGM.PTET51.1.10.255220	PTET.51.1.G0100154	0	0	13	0	0	13	1.365	0	0	2.14	0	0	11	0	0	16
PTET.51.1.G0590009	IESPGM.PTET51.1.59.12970	0.0122	0.0375	IESPGM.PTET51.1.10.161284	PTET.51.1.G0100085	0	0	8	0	0	5	0.94	0	0.0204	0.325	0	0	1	0	0	5
PTET.51.1.G0590160	IESPGM.PTET51.1.59.253811	0.0097	0.0411	IESPGM.PTET51.1.10.364924	PTET.51.1.G0100225	0	0	26	0	0	10	3.45	0	0.0111	3.265	0	0	28	0	0	14
PTET.51.1.G0590215	IESPGM.PTET51.1.59.344197	0.0411	0.0488	IESPGM.PTET51.1.10.446751	PTET.51.1.G0100279	0	0	11	0	0	9	0.855	0	0	0.64	0	0	8	0	0	2
PTET.51.1.G0590256	IESPGM.PTET51.1.59.419984	0.0096	0.0116	IESPGM.PTET51.1.10.518416	PTET.51.1.G0100320	0	0	88	0	0	105	9.835	0	0	6.565	0	0	32	0	0	25
PTET.51.1.G0590032	IESPGM.PTET51.1.59.46905	0.05	0.1892	IESPGM.PTET51.1.10.184556	PTET.51.1.G0100102	0	0	1	0	0	0	0.085	0	0	0.83	0	0	2	0	0	11
PTET.51.1.G0590062	IESPGM.PTET51.1.59.86883	0.0571	0.0267	IESPGM.PTET51.1.10.221520	PTET.51.1.G0100130	0	0	0	0	0	1	0.045	0	0	0.05	0	0	0	0	0	1
PTET.51.1.G0600072	IESPGM.PTET51.1.60.135953	0.012	0.0141	IESPGM.PTET51.1.52.326087	PTET.51.1.G0520210	0	0	1	0	0	4	0.68	0	0	1.92	0	0	15	0	0	17
PTET.51.1.G0600241	IESPGM.PTET51.1.60.417425	0.1	0.0781	IESPGM.PTET51.1.52.44706	PTET.51.1.G0520035	0	0	0	0	0	0	0.015	0	0	1.695	0	0	25	0	0	14
PTET.51.1.G0610060	IESPGM.PTET51.1.61.100266	0.0256	0.0125	IESPGM.PTET51.1.28.369470	PTET.51.1.G0280232	0	0	0	0	0	0	0.08	0	0	0.26	0	0	7	0	0	2
PTET.51.1.G0060080	IESPGM.PTET51.1.6.115286	0.0167	0.0312	IESPGM.PTET51.1.3.705866	PTET.51.1.G0030420	0	0	10	0	0	16	1.14	0	0.0128	1.765	0	0	19	0	0	14
PTET.51.1.G0060006	IESPGM.PTET51.1.6.11879	0.02	0.02	IESPGM.PTET51.1.3.842801	PTET.51.1.G0030514	0	0	4	0	0	2	0.435	0	0	0.72	0	0	8	0	0	7
PTET.51.1.G0610196	IESPGM.PTET51.1.61.319365	0.0118	0.0143	IESPGM.PTET51.1.28.133465	PTET.51.1.G0280085	0	0	7	0	0	7	0.33	0	0	0.385	0	0	1	0	0	0
PTET.51.1.G0610225	IESPGM.PTET51.1.61.361610	0.0196	0.0116	IESPGM.PTET51.1.28.91110	PTET.51.1.G0280060	0	0	27	0	0	13	2.445	0	0	0.255	0	0	1	0	0	2
PTET.51.1.G0610244	IESPGM.PTET51.1.61.385424	0.0225	0.0135	IESPGM.PTET51.1.28.61774	PTET.51.1.G0280038	0.0182	1	54	0	0	64	124.995	0	0.0217	305.595	0	0	62	0	0	71
PTET.51.1.G0060008	IESPGM.PTET51.1.6.14442	0.013	0.0161	IESPGM.PTET51.1.3.838834	PTET.51.1.G0030512	0	0	2	0	0	1	0.24	0	0	0.5	0	0	4	0	0	3
PTET.51.1.G0060108	IESPGM.PTET51.1.6.163778	0.0116	0.0339	IESPGM.PTET51.1.3.652362	PTET.51.1.G0030389	0	0	2	0	0	1	0.18	0	0	0.785	0	0	6	0	0	8
PTET.51.1.G0060109	IESPGM.PTET51.1.6.165622	0.0115	0.0114	IESPGM.PTET51.1.3.650485	PTET.51.1.G0030388	0	0	173	0	0	155	20.97	0	0	7.95	0	0	55	0	0	74
PTET.51.1.G0620102	IESPGM.PTET51.1.62.138466	0.0128	0.0141	IESPGM.PTET51.1.24.197042	PTET.51.1.G0240109	0	0	736	0	0	1030	48.205	0	0	38.415	0	0	510	0	0	716
PTET.51.1.G0620126	IESPGM.PTET51.1.62.175810	0.0217	0.0364	IESPGM.PTET51.1.24.249805	PTET.51.1.G0240144	0	0	5	0	0	21	1.16	0	0	0.25	0	0	4	0	0	5
PTET.51.1.G0060145	IESPGM.PTET51.1.6.233075	0.0274	0.0156	IESPGM.PTET51.1.3.560773	PTET.51.1.G0030340	0	0	7	0	0	14	0.48	0	0	0.74	0	0	5	0	0	11
PTET.51.1.G0620209	IESPGM.PTET51.1.62.337852	0.0299	0.027	IESPGM.PTET51.1.24.403680	PTET.51.1.G0240236	0	0	16	0.2	1	4	0.39	0	0	1.655	0	0	15	0	0	10
PTET.51.1.G0620239	IESPGM.PTET51.1.62.381016	0.0137	0.0115	IESPGM.PTET51.1.24.478010	PTET.51.1.G0240272	0	0	1011	0	0	887	438.005	0	0	0.545	0	0	5	0	0	3
PTET.51.1.G0620254	IESPGM.PTET51.1.62.406413	0.0147	0.0448	IESPGM.PTET51.1.24.507810	PTET.51.1.G0240292	0	0	26	0	0	45	3.475	0	0	4.615	0	0	43	0	0	65
PTET.51.1.G0620048	IESPGM.PTET51.1.62.62978	0.0306	0.0361	IESPGM.PTET51.1.24.82674	PTET.51.1.G0240046	0	0	2	0	0	1	0.055	0	0.0119	0.625	0	0	4	0	0	10
PTET.51.1.G0060205	IESPGM.PTET51.1.6.327384	0.0227	0.0106	IESPGM.PTET51.1.3.451159	PTET.51.1.G0030276	0	0	1052	0	0	911	96.245	0	0	0.095	0	0	0	0	0	0
PTET.51.1.G0060024	IESPGM.PTET51.1.6.33412	0.0127	0.0204	IESPGM.PTET51.1.3.819581	PTET.51.1.G0030495	0	0	73	0	0	97	8.685	0	0	10.575	0	0	95	0	0	88
PTET.51.1.G0630224	IESPGM.PTET51.1.63.372786	0.0172	0.0115	IESPGM.PTET51.1.73.352343	PTET.51.1.G0730217	0	0	9	0	0	17	3.2	0	0	9.66	0	0	31	0	0	35
PTET.51.1.G0640146	IESPGM.PTET51.1.64.251092	0.0405	0.0417	IESPGM.PTET51.1.79.206901	PTET.51.1.G0790139	0	0	72	0	0	59	10.555	0	0.0135	11.18	0	0	112	0	0	78
PTET.51.1.G0640176	IESPGM.PTET51.1.64.299151	0.0128	0.027	IESPGM.PTET51.1.79.253596	PTET.51.1.G0790167	0	0	26	0	0	24	4.93	0	0	9.875	0	0	53	0	0	52
PTET.51.1.G0640215	IESPGM.PTET51.1.64.369575	0.0141	0.0133	IESPGM.PTET51.1.79.302679	PTET.51.1.G0790199	0	0	18	0	0	10	0.835	0	0	0.375	0	0	6	0	0	1
PTET.51.1.G0650099	IESPGM.PTET51.1.65.174332	0.0101	0.0145	IESPGM.PTET51.1.98.176212	PTET.51.1.G0980120	0	0	1	0	0	4	0.095	0	0	0.06	0	0	1	0	0	1
PTET.51.1.G0650114	IESPGM.PTET51.1.65.199748	0.0149	0.0175	IESPGM.PTET51.1.98.143908	PTET.51.1.G0980101	0	0	22	0	0	6	1.405	0	0	1.04	0	0	23	0	0	23
PTET.51.1.G0650184	IESPGM.PTET51.1.65.324132	0.0154	0.0185	IESPGM.PTET51.1.98.49937	PTET.51.1.G0980040	0	0	5	0	0	5	0.88	0	0	0.355	0	0	4	0	0	2
PTET.51.1.G0650196	IESPGM.PTET51.1.65.337049	0.0513	0.1954	IESPGM.PTET51.1.98.37817	PTET.51.1.G0980028	0	0	8	0	0	18	1.085	0	0.0123	0.895	0	0	11	0	0	17
PTET.51.1.G0650058	IESPGM.PTET51.1.65.99251	0.0115	0.013	IESPGM.PTET51.1.98.243748	PTET.51.1.G0980156	0	0	1	0	0	1	2.385	0	0	10.62	0	0	0	0	0	4
PTET.51.1.G0660113	IESPGM.PTET51.1.66.180675	0.0137	0.0135	IESPGM.PTET51.1.71.233220	PTET.51.1.G0710151	0	0	9	0	0	9	0.745	0	0	0.175	0	0	2	0	0	1
PTET.51.1.G0660210	IESPGM.PTET51.1.66.328080	0.0308	0.0208	IESPGM.PTET51.1.71.49672	PTET.51.1.G0710032	0	0	209	0	0	180	14.495	0	0	22.34	0	0	280	0	0	281
PTET.51.1.G0660214	IESPGM.PTET51.1.66.331932	0.0217	0.0274	IESPGM.PTET51.1.71.53491	PTET.51.1.G0710036	0	0	45	0	0	42	8.165	0	0	21.915	0	0	157	0	0	120
PTET.51.1.G0060399	IESPGM.PTET51.1.6.648508	0.0253	0.0119	IESPGM.PTET51.1.3.80600	PTET.51.1.G0030056	0	0	3	0	0	6	0.85	0	0	1.065	0	0	6	0	0	7
PTET.51.1.G0670082	IESPGM.PTET51.1.67.150462	0.0263	0.0152	IESPGM.PTET51.1.76.170222	PTET.51.1.G0760104	0	0	16	0	0	9	1.8	0	0	0.505	0	0	5	0	0	1
PTET.51.1.G0670093	IESPGM.PTET51.1.67.166923	0.0217	0.0127	IESPGM.PTET51.1.76.185029	PTET.51.1.G0760112	0	0	67	0	0	28	4.345	0	0	2.2	0	0	34	0	0	22
PTET.51.1.G0680081	IESPGM.PTET51.1.68.116106	0.0128	0.0125	IESPGM.PTET51.1.178.91511	PTET.51.1.G1780065	0	0	40	0	0	19	3.975	0	0	5.04	0	0	43	0	0	40
PTET.51.1.G0680117	IESPGM.PTET51.1.68.204042	0.0278	0.0152	IESPGM.PTET51.1.163.52784	PTET.51.1.G1630025	0	0	17	0	0	5	0.555	0	0	0.485	0	0	18	0	0	3
PTET.51.1.G0680142	IESPGM.PTET51.1.68.257021	0.02	0.0102	IESPGM.PTET51.1.163.81385	PTET.51.1.G1630044	0	0	116	0	0	134	14	0	0	9.135	0	0	55	0	0	57
PTET.51.1.G0680058	IESPGM.PTET51.1.68.82467	0.0235	0.012	IESPGM.PTET51.1.178.62543	PTET.51.1.G1780045	0	0	50	0	0	85	5.18	0	0	6.77	0	0	110	0	0	84
PTET.51.1.G0690078	IESPGM.PTET51.1.69.166478	0.022	0.0112	IESPGM.PTET51.1.19.255774	PTET.51.1.G0190158	0	0	1	0	0	0	0.405	0	0	0.68	0	0	2	0	0	4
PTET.51.1.G0690120	IESPGM.PTET51.1.69.235074	0.0152	0.0169	IESPGM.PTET51.1.19.154144	PTET.51.1.G0190098	0	0	3	0	0	5	0.63	0	0	3.78	0	0	20	0	0	24
PTET.51.1.G0700050	IESPGM.PTET51.1.70.70170	0.0122	0.0147	IESPGM.PTET51.1.78.73719	PTET.51.1.G0780050	0	0	8	0	0	11	1.265	0	0	2.01	0	0	13	0	0	11
PTET.51.1.G0710093	IESPGM.PTET51.1.71.136653	0.0122	0.0317	IESPGM.PTET51.1.66.221204	PTET.51.1.G0660140	0	0	6	0	0	3	0.56	0	0	0.815	0	0	5	0	0	15
PTET.51.1.G0710197	IESPGM.PTET51.1.71.301464	0.0116	0.0122	IESPGM.PTET51.1.66.45204	PTET.51.1.G0660030	0.0333	1	29	0	0	14	5.17	0	0	17.245	0	0	68	0	0	105
PTET.51.1.G0070092	IESPGM.PTET51.1.7.140763	0.011	0.039	IESPGM.PTET51.1.11.130552	PTET.51.1.G0110092	0	0	137	0	0	152	26.44	0	0	20.325	0	0	233	0	0	224
PTET.51.1.G0070096	IESPGM.PTET51.1.7.146229	0.0455	0.0241	IESPGM.PTET51.1.11.138415	PTET.51.1.G0110097	0	0	1	0	0	0	0.775	0	0	2.475	0	0	39	0	0	27
PTET.51.1.G0720066	IESPGM.PTET51.1.72.113332	0.0172	0.02	IESPGM.PTET51.1.54.117250	PTET.51.1.G0540070	0	0	7	0	0	6	0.94	0	0	0.1	0	0	1	0	0	0
PTET.51.1.G0720087	IESPGM.PTET51.1.72.153687	0.0115	0.0119	IESPGM.PTET51.1.54.163196	PTET.51.1.G0540093	0	0	5	0	0	5	2.415	0	0.0118	1.84	0	0	9	0	0	5
PTET.51.1.G0720087	IESPGM.PTET51.1.72.153718	0.0215	0.0132	IESPGM.PTET51.1.54.163227	PTET.51.1.G0540093	0.25	1	3	0	0	2	2.415	0	0	1.84	0	0	8	0	0	5
PTET.51.1.G0720096	IESPGM.PTET51.1.72.172942	0.011	0.0125	IESPGM.PTET51.1.54.194715	PTET.51.1.G0540109	0	0	6	0	0	6	1.86	0	0	6.32	0	0	70	0	0	53
PTET.51.1.G0720100	IESPGM.PTET51.1.72.180773	0.0137	0.0185	IESPGM.PTET51.1.54.204085	PTET.51.1.G0540113	0	0	3	0	0	6	0.14	0	0	1	0	0	9	0	0	22
PTET.51.1.G0720120	IESPGM.PTET51.1.72.217919	0.0105	0.0106	IESPGM.PTET51.1.54.240860	PTET.51.1.G0540134	0	0	29	0	0	30	2.33	0	0	1.54	0	0	14	0	0	12
PTET.51.1.G0720196	IESPGM.PTET51.1.72.344281	0.0303	0.0185	IESPGM.PTET51.1.54.395536	PTET.51.1.G0540227	0	0	23	0	0	23	1.245	0	0	0.73	0	0	13	0	0	12
PTET.51.1.G0720030	IESPGM.PTET51.1.72.56492	0.0288	0.0145	IESPGM.PTET51.1.54.53722	PTET.51.1.G0540035	0	0	2	0	0	5	0.17	0	0	0.03	0	0	0	0	0	0
PTET.51.1.G0730070	IESPGM.PTET51.1.73.127627	0.0091	0.0098	IESPGM.PTET51.1.63.106005	PTET.51.1.G0630066	0	0	52	0	0	19	5.24	0	0	4.185	0	0	38	0	0	28
PTET.51.1.G0730102	IESPGM.PTET51.1.73.183086	0.0132	0.0119	IESPGM.PTET51.1.63.164124	PTET.51.1.G0630103	0	0	3	0	0	13	2.005	0	0	1.19	0	0	7	0	0	7
PTET.51.1.G0070223	IESPGM.PTET51.1.7.348195	0.0556	0.0182	IESPGM.PTET51.1.11.334034	PTET.51.1.G0110210	0	0	39	0	0	30	4.075	0	0.0143	0.355	0	0	14	0	0	21
PTET.51.1.G0740077	IESPGM.PTET51.1.74.131498	0.023	0.0114	IESPGM.PTET51.1.159.172930	PTET.51.1.G1590100	0	0	0	0	0	0	0.2	0	0	1.605	0	0	30	0	0	20
PTET.51.1.G0740139	IESPGM.PTET51.1.74.245034	0.0233	0.0122	IESPGM.PTET51.1.136.77676	PTET.51.1.G1360041	0	0	10	0	0	3	0.39	0	0	0.225	0	0	0	0	0	0
PTET.51.1.G0740049	IESPGM.PTET51.1.74.82371	0.0108	0.026	IESPGM.PTET51.1.159.102608	PTET.51.1.G1590063	0	0	13	0	0	7	0.38	0	0	0.65	0	0	7	0	0	5
PTET.51.1.G0070034	IESPGM.PTET51.1.7.50192	0.0238	0.0196	IESPGM.PTET51.1.11.53101	PTET.51.1.G0110040	0	0	8	0	0	5	0.295	0	0	0.03	0	0	0	0	0	0
PTET.51.1.G0750121	IESPGM.PTET51.1.75.202912	0.0109	0.02	IESPGM.PTET51.1.112.148677	PTET.51.1.G1120090	0	0	1	0	0	0	0.625	0	0	1.305	0	0	2	0	0	1
PTET.51.1.G0070327	IESPGM.PTET51.1.7.522003	0.0213	0.012	IESPGM.PTET51.1.11.503622	PTET.51.1.G0110318	0	0	0	0	0	0	0.12	0	0	0.13	0	0	0	0	0	0
PTET.51.1.G0750181	IESPGM.PTET51.1.75.305358	0.0108	0.0119	IESPGM.PTET51.1.112.250527	PTET.51.1.G1120149	0	0	3069	0	0	3147	368.9	0	0.0172	173.015	0	0	1100	0	0	1194
PTET.51.1.G0750049	IESPGM.PTET51.1.75.89918	0.0312	0.0141	IESPGM.PTET51.1.112.16037	PTET.51.1.G1120006	0	0	3	0	0	3	0.75	0	0	3.215	0	0	33	0	0	31
PTET.51.1.G0760065	IESPGM.PTET51.1.76.111460	0.0312	0.0109	IESPGM.PTET51.1.67.71322	PTET.51.1.G0670041	0	0	9	0	0	6	0.63	0	0.0137	0.235	0	0	1	0	0	3
PTET.51.1.G0760075	IESPGM.PTET51.1.76.124526	0.0112	0.027	IESPGM.PTET51.1.67.85621	PTET.51.1.G0670050	0	0	3	0	0	7	0.375	0	0	3.94	0	0	42	0	0	28
PTET.51.1.G0760084	IESPGM.PTET51.1.76.144838	0.0109	0.0141	IESPGM.PTET51.1.67.119890	PTET.51.1.G0670063	0	0	2	0	0	0	0.04	0	0	0.09	0	0	1	0	0	3
PTET.51.1.G0760125	IESPGM.PTET51.1.76.207822	0.022	0.012	IESPGM.PTET51.1.67.173301	PTET.51.1.G0670098	0	0	14	0	0	16	1.065	0	0.0109	7.395	0	0	61	0	0	61
PTET.51.1.G0760212	IESPGM.PTET51.1.76.340404	0.3909	0.3553	IESPGM.PTET51.1.67.309010	PTET.51.1.G0670188	0	0	0	0	0	1	0.04	0	0.0159	0.405	0	0	1	0	0	4
PTET.51.1.G0770009	IESPGM.PTET51.1.77.16494	0.0328	0.0588	IESPGM.PTET51.1.90.306519	PTET.51.1.G0900206	0	0	7	0	0	12	0.75	0	0	0.29	0	0	1	0	0	7
PTET.51.1.G0770020	IESPGM.PTET51.1.77.35999	0.0253	0.0156	IESPGM.PTET51.1.90.290860	PTET.51.1.G0900195	0	0	4	0	0	10	1.335	0	0	0.535	0	0	6	0	0	5
PTET.51.1.G0770051	IESPGM.PTET51.1.77.81042	0.0098	0.0217	IESPGM.PTET51.1.90.244202	PTET.51.1.G0900163	0	0	1	0	0	0	0.145	0	0	0.315	0	0	3	0	0	0
PTET.51.1.G0780157	IESPGM.PTET51.1.78.272686	0.0114	0.012	IESPGM.PTET51.1.70.283161	PTET.51.1.G0700160	0	0	23	0	0	24	5.775	0	0	31.075	0	0	70	0	0	91
PTET.51.1.G0780032	IESPGM.PTET51.1.78.47613	0.0309	0.0122	IESPGM.PTET51.1.70.43184	PTET.51.1.G0700033	0	0	2	0	0	8	0.73	0	0	1.095	0	0	8	0	0	7
PTET.51.1.G0780059	IESPGM.PTET51.1.78.97762	0.0127	0.0135	IESPGM.PTET51.1.70.88243	PTET.51.1.G0700057	0	0	3	0	0	3	0.67	0	0.0263	0.665	0	0	0	0	0	4
PTET.51.1.G0790193	IESPGM.PTET51.1.79.289655	0.0116	0.0127	IESPGM.PTET51.1.64.352676	PTET.51.1.G0640205	0	0	11	0	0	13	1.23	0	0	1.535	0	0	10	0	0	20
PTET.51.1.G0800096	IESPGM.PTET51.1.80.130207	0.0135	0.0132	IESPGM.PTET51.1.138.27771	PTET.51.1.G1380016	0	0	8	0	0	17	1.475	0	0	1.06	0	0	6	0	0	13
PTET.51.1.G0800186	IESPGM.PTET51.1.80.256112	0.0135	0.0115	IESPGM.PTET51.1.138.155828	PTET.51.1.G1380104	0	0	4	0	0	2	0.39	0	0	0.225	0	0	2	0	0	0
PTET.51.1.G0080122	IESPGM.PTET51.1.8.190020	0.0345	0.0133	IESPGM.PTET51.1.1.284769	PTET.51.1.G0010159	0	0	95	0	0	114	12.075	0	0.0115	1.23	0	0	20	0	0	8
PTET.51.1.G0820203	IESPGM.PTET51.1.82.317841	0.0095	0.0132	IESPGM.PTET51.1.20.316768	PTET.51.1.G0200184	0	0	3	0	0	0	1	0	0	1.885	0	0	5	0	0	3
PTET.51.1.G0820203	IESPGM.PTET51.1.82.318274	0.0227	0.0106	IESPGM.PTET51.1.20.317201	PTET.51.1.G0200184	0	0	2	0	0	4	1	0	0	1.885	0	0	3	0	0	7
PTET.51.1.G0820203	IESPGM.PTET51.1.82.321843	0.013	0.0137	IESPGM.PTET51.1.20.320770	PTET.51.1.G0200184	0	0	12	0	0	9	1	0	0.0099	1.885	0	0	18	0	0	12
PTET.51.1.G0080020	IESPGM.PTET51.1.8.28488	0.0125	0.0118	IESPGM.PTET51.1.1.68962	PTET.51.1.G0010036	0	0	17	0	0	8	1.95	0	0	1.5	0	0	8	0	0	14
PTET.51.1.G0830072	IESPGM.PTET51.1.83.153252	0.0128	0.0115	IESPGM.PTET51.1.47.130457	PTET.51.1.G0470063	0	0	1	0	0	1	0.47	0	0	0.275	0	0	2	0	0	0
PTET.51.1.G0830087	IESPGM.PTET51.1.83.177851	0.0109	0.0441	IESPGM.PTET51.1.47.193058	PTET.51.1.G0470095	0	0	5	0	0	7	0.705	0	0	0.395	0	0	4	0	0	6
PTET.51.1.G0830116	IESPGM.PTET51.1.83.230596	0.0128	0.0149	IESPGM.PTET51.1.58.341749	PTET.51.1.G0580184	0	0	3	0	0	14	0.58	0	0	0.76	0	0	5	0	0	3
PTET.51.1.G0830051	IESPGM.PTET51.1.83.90351	0.0132	0.0135	IESPGM.PTET51.1.47.123262	PTET.51.1.G0470062	0	0	1	0	0	0	0.175	0	0	0.005	0	0	0	0	0	0
PTET.51.1.G0840115	IESPGM.PTET51.1.84.200568	0.0704	0.1077	IESPGM.PTET51.1.117.154644	PTET.51.1.G1170090	0	0	35	0.0417	1	23	37.1	0	0.0149	74.65	0	0	42	0	0	67
PTET.51.1.G0840162	IESPGM.PTET51.1.84.279975	0.0465	0.0204	IESPGM.PTET51.1.117.241342	PTET.51.1.G1170142	0	0	25	0	0	15	0.95	0	0	6.875	0	0	133	0	0	97
PTET.51.1.G0840179	IESPGM.PTET51.1.84.317724	0.0128	0.0156	IESPGM.PTET51.1.117.262794	PTET.51.1.G1170154	0	0	5	0	0	14	1.33	0	0.0154	1.27	0	0	10	0	0	4
PTET.51.1.G0840032	IESPGM.PTET51.1.84.50553	0.0106	0.0137	IESPGM.PTET51.1.117.33040	PTET.51.1.G1170017	0	0	27	0	0	23	3.605	0	0	7.47	0	0	60	0	0	42
PTET.51.1.G0080311	IESPGM.PTET51.1.8.478493	0.0247	0.0123	IESPGM.PTET51.1.1.626011	PTET.51.1.G0010377	0	0	1	0	0	0	0.375	0	0.0175	0.58	0	0	2	0	0	2
PTET.51.1.G0080317	IESPGM.PTET51.1.8.491805	0.0108	0.0169	IESPGM.PTET51.1.1.647630	PTET.51.1.G0010389	0	0	3	0	0	2	0.34	0	0	0.375	0	0	2	0	0	6
PTET.51.1.G0850092	IESPGM.PTET51.1.85.142114	0.0164	0.0122	IESPGM.PTET51.1.111.55584	PTET.51.1.G1110026	0	0	1	0	0	4	0.61	0	0	0.56	0	0	2	0	0	5
PTET.51.1.G0080334	IESPGM.PTET51.1.8.517221	0.0267	0.0137	IESPGM.PTET51.1.1.676791	PTET.51.1.G0010410	0	0	8	0	0	3	0.585	0	0.0215	0.65	0	0	4	0	0	5
PTET.51.1.G0850128	IESPGM.PTET51.1.85.197122	0.0118	0.0132	IESPGM.PTET51.1.111.133609	PTET.51.1.G1110071	0	0	13	0	0	15	0.85	0	0.0115	0.635	0	0	10	0	0	11
PTET.51.1.G0850174	IESPGM.PTET51.1.85.275318	0.0225	0.0111	IESPGM.PTET51.1.111.214106	PTET.51.1.G1110123	0	0	8	0	0	3	1.07	0	0	1.78	0	0	23	0	0	7
PTET.51.1.G0850182	IESPGM.PTET51.1.85.285265	0.0116	0.0154	IESPGM.PTET51.1.111.222696	PTET.51.1.G1110132	0	0	1	0	0	2	0.105	0	0	1.15	0	0	15	0	0	13
PTET.51.1.G0080381	IESPGM.PTET51.1.8.613618	0.033	0.039	IESPGM.PTET51.1.1.776243	PTET.51.1.G0010464	0	0	21	0	0	21	1.635	0	0.013	1.97	0	0	12	0	0	18
PTET.51.1.G0860096	IESPGM.PTET51.1.86.149618	0.0154	0.0133	IESPGM.PTET51.1.158.213467	PTET.51.1.G1580104	0	0	5	0	0	3	0.71	0	0	0.975	0	0	9	0	0	8
PTET.51.1.G0860138	IESPGM.PTET51.1.86.198378	0.0132	0.0145	IESPGM.PTET51.1.158.162165	PTET.51.1.G1580068	0	0	2	0	0	4	0.265	0	0	1.095	0	0	12	0	0	6
PTET.51.1.G0860165	IESPGM.PTET51.1.86.245048	0.0102	0.0139	IESPGM.PTET51.1.158.103408	PTET.51.1.G1580046	0	0	23	0	0	16	2.97	0	0	4.325	0	0	39	0	0	14
PTET.51.1.G0080006	IESPGM.PTET51.1.8.6277	0.0115	0.0137	IESPGM.PTET51.1.1.31724	PTET.51.1.G0010021	0	0	2	0	0	0	0.155	0	0	1.915	0	0	6	0	0	10
PTET.51.1.G0860021	IESPGM.PTET51.1.86.34438	0.0104	0.0127	IESPGM.PTET51.1.95.116146	PTET.51.1.G0950072	0	0	119	0	0	102	12.525	0	0	11.84	0	0	85	0	0	85
PTET.51.1.G0870081	IESPGM.PTET51.1.87.150706	0.0353	0.0513	IESPGM.PTET51.1.23.239707	PTET.51.1.G0230143	0	0	12	0	0	13	1.14	0	0	2.71	0	0	29	0	0	33
PTET.51.1.G0870097	IESPGM.PTET51.1.87.177006	0.0189	0.01	IESPGM.PTET51.1.23.205409	PTET.51.1.G0230128	0	0	1626	0	0	1333	342.585	0	0	224.645	0	0	1110	0	0	938
PTET.51.1.G0870097	IESPGM.PTET51.1.87.177029	0.0093	0.0108	IESPGM.PTET51.1.23.205386	PTET.51.1.G0230128	0	0	1560	0	0	1274	342.585	0	0	224.645	0	0	1070	0	0	906
PTET.51.1.G0870103	IESPGM.PTET51.1.87.184129	0.0101	0.0128	IESPGM.PTET51.1.23.198239	PTET.51.1.G0230122	0	0	1	0	0	0	1.555	0	0	0.98	0	0	1	0	0	2
PTET.51.1.G0870039	IESPGM.PTET51.1.87.83514	0.0108	0.0278	IESPGM.PTET51.1.4.266316	PTET.51.1.G0040154	0	0	11	0	0	2	0.415	0	0	0.43	0	0	5	0	0	3
PTET.51.1.G0880080	IESPGM.PTET51.1.88.148550	0.0118	0.0217	IESPGM.PTET51.1.124.98657	PTET.51.1.G1240056	0	0	77	0	0	25	3.535	0	0	19.745	0	0	222	0	0	171
PTET.51.1.G0880148	IESPGM.PTET51.1.88.266789	0.0154	0.0154	IESPGM.PTET51.1.124.199145	PTET.51.1.G1240113	0	0	6	0	0	4	0.56	0	0	0.43	0	0	2	0	0	4
PTET.51.1.G0880148	IESPGM.PTET51.1.88.266987	0.0169	0.0139	IESPGM.PTET51.1.124.199349	PTET.51.1.G1240113	0	0	4	0	0	5	0.56	0	0	0.43	0	0	6	0	0	5
PTET.51.1.G0080057	IESPGM.PTET51.1.8.88729	0.0125	0.0152	IESPGM.PTET51.1.1.129746	PTET.51.1.G0010073	0	0	201	0	0	247	23.255	0	0	23.205	0	0	164	0	0	219
PTET.51.1.G0880042	IESPGM.PTET51.1.88.91089	0.0145	0.0147	IESPGM.PTET51.1.124.45337	PTET.51.1.G1240018	0	0	1	0	0	13	0.42	0	0.0317	0.09	0	0	0	0	0	1
PTET.51.1.G0890087	IESPGM.PTET51.1.89.130816	0.0132	0.0119	IESPGM.PTET51.1.119.85522	PTET.51.1.G1190059	0	0	80	0	0	42	16.855	0	0.0198	1.36	0	0	9	0	0	7
PTET.51.1.G0890129	IESPGM.PTET51.1.89.205175	0.0137	0.0222	IESPGM.PTET51.1.119.148890	PTET.51.1.G1190098	0	0	0	0	0	0	0.095	0	0	0.155	0	0	3	0	0	0
PTET.51.1.G0890143	IESPGM.PTET51.1.89.229230	0.0164	0.0119	IESPGM.PTET51.1.119.180500	PTET.51.1.G1190122	0	0	458	0	0	433	46.365	0	0	337.445	0	0	3532	0	0	3710
PTET.51.1.G0900133	IESPGM.PTET51.1.90.199656	0.039	0.0125	IESPGM.PTET51.1.77.128687	PTET.51.1.G0770082	0	0	2	0	0	5	0.445	0	0	0.785	0	0	5	0	0	3
PTET.51.1.G0900207	IESPGM.PTET51.1.90.308831	0.0299	0.0175	IESPGM.PTET51.1.77.14179	PTET.51.1.G0770008	0	0	12	0	0	16	1.7	0	0	0.1	0	0	0	0	0	0
PTET.51.1.G0900038	IESPGM.PTET51.1.90.56286	0.0217	0.038	IESPGM.PTET51.1.77.288737	PTET.51.1.G0770169	0	0	5	0	0	2	0.32	0	0	0.685	0	0	15	0	0	8
PTET.51.1.G0900052	IESPGM.PTET51.1.90.78593	0.0122	0.0123	IESPGM.PTET51.1.191.19414	PTET.51.1.G1910017	0	0	0	0	0	3	0.845	0	0	2.185	0	0	11	0	0	7
PTET.51.1.G0910166	IESPGM.PTET51.1.91.309807	0.0139	0.0147	IESPGM.PTET51.1.92.297127	PTET.51.1.G0920178	0	0	9	0	0	6	0.385	0	0	0.24	0	0	4	0	0	9
PTET.51.1.G0920087	IESPGM.PTET51.1.92.154172	0.0488	0.0308	IESPGM.PTET51.1.91.149070	PTET.51.1.G0910082	0	0	135	0	0	177	14.05	0	0	34.71	0	0	539	0	0	430
PTET.51.1.G0920100	IESPGM.PTET51.1.92.173126	0.0247	0.0164	IESPGM.PTET51.1.91.168059	PTET.51.1.G0910094	0	0	4	0	0	4	0.255	0	0.0333	0.825	0	0	6	0	0	12
PTET.51.1.G0920119	IESPGM.PTET51.1.92.204077	0.0115	0.0123	IESPGM.PTET51.1.91.198993	PTET.51.1.G0910108	0	0	0	0	0	2	0.035	0	0	0.17	0	0	1	0	0	3
PTET.51.1.G0920137	IESPGM.PTET51.1.92.221167	0.0361	0.0128	IESPGM.PTET51.1.91.211488	PTET.51.1.G0910118	0	0	0	0	0	0	11.585	0	0	28.43	0	0	0	0	0	0
PTET.51.1.G0920183	IESPGM.PTET51.1.92.312754	0.0241	0.0114	IESPGM.PTET51.1.91.325433	PTET.51.1.G0910171	0	0	7	0	0	8	2.395	0	0	1.905	0	0	8	0	0	4
PTET.51.1.G0930131	IESPGM.PTET51.1.93.208935	0.0139	0.0247	IESPGM.PTET51.1.118.99442	PTET.51.1.G1180068	0	0	4	0	0	3	0.305	0	0.0303	1.09	0	0	6	0	0	4
PTET.51.1.G0930153	IESPGM.PTET51.1.93.239713	0.0106	0.0104	IESPGM.PTET51.1.118.72368	PTET.51.1.G1180048	0	0	1917	0	0	1915	167.71	0	0	149.5	0	0	1222	0	0	1266
PTET.51.1.G0930170	IESPGM.PTET51.1.93.264641	0.0102	0.0244	IESPGM.PTET51.1.118.51554	PTET.51.1.G1180035	0	0	26	0	0	18	1.585	0	0.011	3.23	0	0	36	0	0	28
PTET.51.1.G0090182	IESPGM.PTET51.1.9.335465	0.0215	0.0147	IESPGM.PTET51.1.26.256722	PTET.51.1.G0260149	0	0	38	0	0	40	4.055	0	0	3.305	0	0	26	0	0	21
PTET.51.1.G0930005	IESPGM.PTET51.1.93.7447	0.0161	0.0196	IESPGM.PTET51.1.118.278782	PTET.51.1.G1180174	0	0	2	0	0	0	0.275	0	0	0.745	0	0	11	0	0	17
PTET.51.1.G0090220	IESPGM.PTET51.1.9.387217	0.0123	0.0161	IESPGM.PTET51.1.26.308973	PTET.51.1.G0260183	0	0	8	0	0	11	0.985	0	0	1.91	0	0	12	0	0	10
PTET.51.1.G0940119	IESPGM.PTET51.1.94.185115	0.0217	0.0299	IESPGM.PTET51.1.81.152618	PTET.51.1.G0810093	0	0	0	0	0	1	0.02	0	0	0	0	0	0	0	0	1
PTET.51.1.G0090302	IESPGM.PTET51.1.9.526087	0.0366	0.0508	IESPGM.PTET51.1.26.408887	PTET.51.1.G0260260	0	0	5	0	0	7	0.275	0	0	1.385	0	0	19	0	0	22
PTET.51.1.G0950032	IESPGM.PTET51.1.95.51425	0.0135	0.0122	IESPGM.PTET51.1.86.113915	PTET.51.1.G0860071	0.0179	1	55	0	0	47	4.305	0	0	3.295	0	0	28	0	0	38
PTET.51.1.G0950034	IESPGM.PTET51.1.95.55468	0.0115	0.0122	IESPGM.PTET51.1.86.110143	PTET.51.1.G0860069	0	0	2	0	0	8	0.685	0	0	5.905	0	0	48	0	0	52
PTET.51.1.G0960009	IESPGM.PTET51.1.96.13739	0.0112	0.0127	IESPGM.PTET51.1.106.266039	PTET.51.1.G1060169	0	0	8	0	0	6	0.38	0	0	0.675	0	0	10	0	0	6
PTET.51.1.G0960126	IESPGM.PTET51.1.96.220010	0.0127	0.0112	IESPGM.PTET51.1.106.75971	PTET.51.1.G1060059	0	0	12	0	0	10	0.26	0	0.0225	0.245	0	0	8	0	0	2
PTET.51.1.G0960159	IESPGM.PTET51.1.96.263935	0.0132	0.0233	IESPGM.PTET51.1.106.28865	PTET.51.1.G1060018	0	0	21	0	0	27	1.85	0	0	1.47	0	0	30	0	0	32
PTET.51.1.G0970082	IESPGM.PTET51.1.97.112396	0.0233	0.0244	IESPGM.PTET51.1.12.139809	PTET.51.1.G0120077	0	0	0	0	0	0	0.045	0	0	0.07	0	0	0	0	0	0
PTET.51.1.G0970082	IESPGM.PTET51.1.97.113534	0.027	0.0149	IESPGM.PTET51.1.12.138671	PTET.51.1.G0120077	0	0	0	0	0	0	0.045	0	0.013	0.07	0	0	0	0	0	0
PTET.51.1.G0980097	IESPGM.PTET51.1.98.136626	0.0122	0.0169	IESPGM.PTET51.1.65.207269	PTET.51.1.G0650118	0	0	64	0	0	65	10.67	0	0	7.855	0	0	64	0	0	67
PTET.51.1.G0980184	IESPGM.PTET51.1.98.286412	0.0152	0.0128	IESPGM.PTET51.1.65.55866	PTET.51.1.G0650027	0	0	144	0	0	122	264.785	0	0	358.75	0	0	205	0	0	202
PTET.51.1.G0990095	IESPGM.PTET51.1.99.147646	0.0099	0.0101	IESPGM.PTET51.1.57.311003	PTET.51.1.G0570173	0	0	16	0	0	9	2.065	0	0	1.08	0	0	3	0	0	8
PTET.51.1.G0990126	IESPGM.PTET51.1.99.191780	0.0115	0.0104	IESPGM.PTET51.1.57.352891	PTET.51.1.G0570202	0	0	3	0	0	1	0.11	0	0	4.495	0	0	61	0	0	52
PTET.51.1.G0990010	IESPGM.PTET51.1.99.20168	0.0118	0.0164	IESPGM.PTET51.1.57.192415	PTET.51.1.G0570098	0	0	32	0	0	21	3.035	0	0.0308	6.2	0	0	68	0	0	50
PTET.51.1.G0990030	IESPGM.PTET51.1.99.44326	0.028	0.0137	IESPGM.PTET51.1.57.215784	PTET.51.1.G0570120	0	0	1369	0	0	1008	146.025	0	0	95.685	0	0	948	0	0	829

## Sheet: Legend S5
Supplemental Table S5. Genes with incompletely excised IESs show a reduced expression level compared to their ohnolog from the most recent genome duplication carrying a homologous IES which is perfectly excised, based on RNA collected from independent lines cultured at 25°C with presumably similar IES retention profiles as the DNA samples of the same temperature. Columns without any prefix refer …
