# Supplementary material for: Environmentally induced plasticity of programmed DNA elimination boosts somatic variability in Paramecium tetraurelia
Source: HighWire-hosted journal article supplement (doi:10.1101/gr.245332.118), 2019-09-23
Supplement: Supplemental_Figures_and_Tables.zip [file Supplemental_Table_S6.xlsx]

## Sheet: Table S6
GO.ID	Molecular Function	Annotated	Observed	Expected	classicFisher	padjust
GO:0005216	ion channel activity	156	138	85.42	1.2e-13	3.684e-11
GO:0004871	signal transducer activity	93	83	50.92	3.2e-13	9.792e-11
GO:0005524	ATP binding	164	126	89.8	2.6e-09	7.93e-07
GO:0005515	protein binding	2710	1551	1483.9	6.2e-06	0.0018848
GO:0004872	receptor activity	68	55	37.23	1.1e-05	0.003333
GO:0005262	calcium channel activity	22	21	12.05	3.3e-05	0.009966
GO:0030246	carbohydrate binding	61	48	33.4	8.3e-05	0.024983
GO.ID	Biological Process	Annotated	Expected	Expected	classicFisher	padjust
GO:0007165	signal transduction	229	162	127.79	7.3e-12	4.0296e-05
GO:0006464	cellular protein modification process	2945	1765	1643.35	8.1e-10	0.0044631
GO:0007275	multicellular organism development	50	47	27.9	2.1e-09	0.001155
GO:0006812	cation transport	224	153	125	1.4e-06	0.0007686
GO:0006468	protein phosphorylation	2676	1573	1493.25	2.0e-05	0.01096
GO:0070588	calcium ion transmembrane transport	21	20	11.72	8.3e-05	0.045401

## Sheet: Legend S6
Supplemental Table S6. Enriched GO-terms for IES-containing genes as output by the topGO R package (Alexa and Rahnenfuhrer, 2016). IES-genes (predefined list of interesting genes) were tested against the full set of P. tetraurelia macronuclear genes (v2) for enrichment of Gene Ontology (GO) terms. P-values were adjusted for multiple comparisons with the Benjamini-Hochberg procedure (BH).
Reference
Alexa A, and Rahnenfuhrer J. 2016. "topGO: Enrichment analysis for Gene Ontology. R package version 2.28. 0." CRAN
