# Supplementary material for: Environmentally induced plasticity of programmed DNA elimination boosts somatic variability in Paramecium tetraurelia
Source: HighWire-hosted journal article supplement (doi:10.1101/gr.245332.118), 2019-09-23
Supplement: Supplemental_Figures_and_Tables.zip [file Supplemental_Table_S7.xlsx]

## Sheet: Table S7
	Dcl5_KD-Sensitive	Dcl5_KD-Insensitive	Column Total	Dcl5-IESs (%)	P-value	odds ratio	Lower C.I. 95	Upper C.I. 95
TPR-Genes	122	1013	1135	10.7489	1.053e-12	2.14766	1.75546	2.60896
Non-TPR-Genes	1971	35149	37120	5.30981
Row Total	2093	36162	38255
	Dcl2/3_KD-Sensitive	Dcl2/3_KD-Insensitive	Column Total	Dc2/3-IESs (%)	P-value	odds ratio	Lower C.I. 95	Upper C.I. 95
TPR-Genes	13	1122	1135	1.14537	1.272e-15	0.186342	0.0987446	0.320676
Non-TPR-Genes	2173	34947	37120	5.85399
Row Total	2186	36069	38255

## Sheet: Legend S7
Supplemental Table S7. Enrichment test for epigenetically controlled IESs in Tetratricopeptide repeat-containing proteins (TPR genes). The grand total represents the number of intragenic IESs. Overrepresentation of Dcl5-sensitive IESs in TPR genes (top). Underrepresentation of Dcl2/3-sensitive IESs in TPR genes (bottom). P-value, Fisher's Exact Test for Count Data. C.I., 95 percent Confidence Int…
